# Supplementary material for: Photochromism of phenazine-2,3-diol derivatives through excited state intermolecular proton transfer based on keto–enol tautomerization
Source: Royal Society of Chemistry journal article supplement (doi:10.1039/d4ob00387j), 2024-01-01
Supplement: d4ob00387j1.pdf [file d4ob00387j1.pdf]

## Electronic Supplementary Information

### **Photochromism of phenazine-2,3-diol derivatives through excited state intermolecular proton transfer based on keto–enol tautomerization**

Kazuki Ohira, Kumpei Kozuka, Naoki Kaneda, Masahiro Yamamoto, Keiichi Imato and Yousuke Ooyama\*

*Applied Chemistry Program, Graduate School of Advanced Science and Engineering, Hiroshima University, 1-4-1 Kagamiyama, Higashi-Hiroshima 739-8527, Japan.*

*E-mail: yooyama@hiroshima-u.ac.jp*

## 1. Methods

All solvents and reagents were used as received.  $^1\text{H}$  NMR and  $^{13}\text{C}$  NMR spectra were recorded using Varian-400 (400 MHz) and Varian-500 (500 MHz) FT NMR spectrometer. FT-IR spectra were recorded using a Shimadzu IRTracer-100. High-resolution mass spectral data were acquired using a Thermo Fisher Scientific LTQ Orbitrap XL. Photoabsorption spectra were recorded using Shimadzu UV-3600-plus spectrophotometers. Fluorescence spectra were measured using a Hitachi F-4500 and HORIBA FluoroMax-4 spectrophotometer. The fluorescence quantum yields ( $\Phi_{\text{FL}}$ ) were determined with a Hamamatsu C9920-01 instrument equipped with CCD by use of a calibrated integrating sphere system. Fluorescence decay measurements were performed using a HORIBA DeltaFlex modular fluorescence lifetime system, using a Nano LED pulsed diode excitation source (366 nm and 451 nm). Phosphorescence decay measurements were performed using HORIBA FluoroMax-4 spectrophotometer. Thermogravimetry and differential thermal analysis (TG-DTA) were conducted under nitrogen atmosphere at a heating rate of  $10\text{ }^\circ\text{C min}^{-1}$  using a Rigaku Thermo plus EV02 TG-DTA8122. Differential scanning calorimetric (DSC) measurements were performed under nitrogen atmosphere using a Hitachi DSC7000X. Powder X-ray diffraction measurements were performed on a Rigaku MiniFlex600-C/CM diffractometer with  $\text{Cu K}\alpha$  radiator.

## 2. Synthesis

Phenazine-2,3-diol derivatives **PD1**, **PD2**, and **PD3** were synthesized by a facile synthetic protocol as shown in Scheme S1. **PD1** was prepared by the cyclodehydration of the *o*-phenylenediamine with 2,5-dihydroxy-1,4-benzoquinone. The reactions of **PD1** with chloromethyl methyl ether gave the derivatives **PD2** and **PD3**. These dyes were successfully characterized by  $^1\text{H}$  NMR,  $^{13}\text{C}$  NMR, FTIR, and high-resolution mass spectrometric analysis.

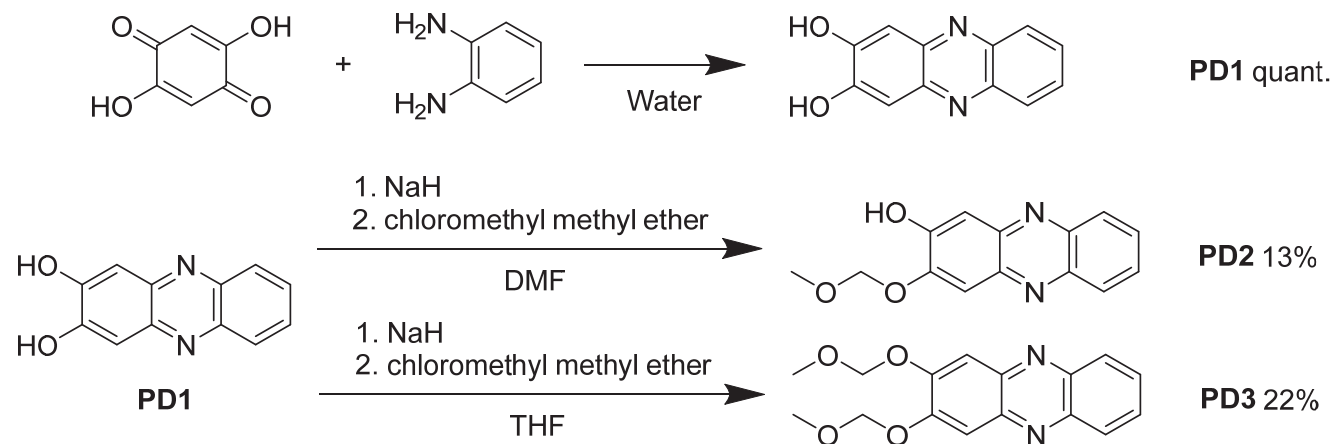

**Scheme. S1** Synthetic routes of **PD1–3**.

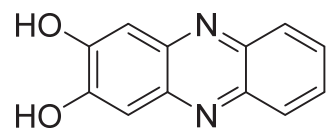

**PD1** was synthesized according to procedures described in ref. S1.

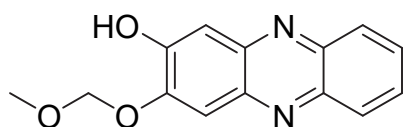

**PD2** A solution of sodium hydride abt. 60 % oil suspension (41 mg) and **PD1** (218 mg, 1.03 mmol) in DMF (50 mL) was stirred at 0 °C for 30 min. Then, chloromethyl methyl ether (75  $\mu$ L, 1.00 mmol) was added to the solution, and the mixture was stirred at 0 °C overnight. After concentrating under reduced pressure, the residue was chromatographed on silica gel (ethyl acetate/hexane = 1/4 as eluent). The resulting residue was dissolved in THF and subjected to reprecipitation by hexane to afford **PD2** as a white yellow solid (219 mg, 50% yield); m.p. 184 °C; IR (ATR):  $\tilde{\nu}$  = 2785, 1636, 1601, 1570, 1537, 1516  $\text{cm}^{-1}$ ;  $^1\text{H}$  NMR (500 MHz, acetone- $d_6$ ):  $\delta$  = 9.32 (s, br, 1H, OH) 8.07–8.15 (m, 2H, aromatic), 7.74–7.85 (m, 2H, aromatic), 7.63 (s, 1H, aromatic), 7.43 (s, 1H, aromatic), 5.57 (s, 2H,  $\text{CH}_2$ ), 3.57 (s, 3H,  $\text{CH}_3$ ) ppm;  $^{13}\text{C}$  NMR (125 MHz,  $\text{CDCl}_3$ ): 152.00, 143.09, 143.07, 142.68, 142.25, 130.00, 129.92, 129.74, 129.48, 109.45, 109.09, 96.06, 56.96 ppm; HRMS (ESI):  $m/z$  found 257.09195  $[\text{M}+\text{H}]^+$ , calculated for  $\text{C}_{14}\text{H}_{13}\text{N}_2\text{O}_3$   $[\text{M}+\text{H}]^+$ : 257.09207.

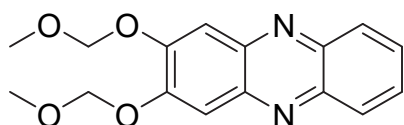

**PD3** A solution of sodium hydride abt. 60 % oil suspension (83 mg) and **PD1** (216 mg, 1.02 mmol) in DMF (50 mL) was stirred at 0 °C for 30 min. Then, chloromethyl methyl ether (150  $\mu$ L, 2.00 mmol) was added to the solution, and the mixture was stirred at 0 °C overnight. After concentrating under reduced pressure, the residue was chromatographed on silica gel (ethyl acetate/hexane = 1/4 as eluent). The resulting residue was dissolved in THF and subjected to reprecipitation by hexane to afford **PD3** as a white solid (158 mg, 53% yield); m.p. 137 °C; IR (ATR):  $\tilde{\nu}$  = 2785, 1636, 1601, 1570, 1537, 1516  $\text{cm}^{-1}$ ;  $^1\text{H}$  NMR (500 MHz, acetone- $d_6$ ):  $\delta$  = 8.11–8.16 (m, 2H, aromatic), 7.80–7.84 (m, 2H, aromatic), 7.65 (s, 2H, aromatic), 5.55 (s, 4H,  $\text{CH}_2$ ), 3.57 (s, 6H,  $\text{CH}_3$ ) ppm;  $^{13}\text{C}$  NMR (125 MHz, acetone- $d_6$ ):  $\delta$  = 153.08, 143.13, 142.53, 130.00, 129.98, 110.17, 95.97, 56.81, 56.80 ppm; HRMS (APCI):  $m/z$  found 301.11872  $[\text{M}+\text{H}]^+$ , calculated for  $\text{C}_{16}\text{H}_{17}\text{N}_2\text{O}_4$   $[\text{M}+\text{H}]^+$ : 301.11828.

### 3. X-Ray crystallographic analysis

The reflection data of **PZ1** and **PZ2** have been reported in Ref. S1, with the S3 Cambridge Crystallographic Data Centre (CCDC 2194829 for **PZ1** and CCDC 2194831 for **PZ2**).

The reflection data of **PD1** (keto form) and **PD2** were collected at 100 K and 300 K on a RIGAKU XtaLAB Synergy R/DW diffractometer using Mo K $\alpha$  radiation ( $\lambda = 0.71073 \text{ \AA}$ ). The structures were resolved using direct methods with SHELXT 2018/2 and refined using full-matrix least-squares techniques against  $F^2$  (SHELXL 2018/3). Hydrogen atoms were fixed geometrically and not refined. Crystallographic data have been deposited in the S3 Cambridge Crystallographic Data Centre (CCDC 2328436 (100K) and 2328438 (300 K) for **PD1** and CCDC 2328440 (100 K) and 2328442 (300K) for **PD2**).

**Crystal of PD1:** A suitable crystal of **PD1 (keto form)**, appearing as a dark red block and plate, was obtained through the sublimation of **PD1** black powder at a pressure of  $6.7 \times 10^{-2} \text{ Pa}$  and a temperature of 235 °C.

Crystallographic data (keto form, measured at 100 K): CCDC 2328436, C<sub>12</sub>H<sub>8</sub>N<sub>2</sub>O<sub>2</sub>,  $M = 212.21$ , monoclinic,  $a = 3.7249(2)$ ,  $b = 9.6327(4)$ ,  $c = 12.9466(5) \text{ \AA}$ ,  $\beta = 92.843(3)^\circ$ ,  $V = 463.96(4) \text{ \AA}^3$ ,  $D_{\text{calcd}} = 1.519 \text{ g cm}^{-3}$ , space group  $P2_1$  (no.4),  $Z = 2$ , 4946 reflections measured, 2365 unique ( $R_{\text{int}} = 0.0186$ ), which were used in all calculations. The final  $R_1(\text{reflections}) = 0.0349$  (2153) [ $I > 2\sigma(I)$ ],  $wR_2(\text{reflections}) = 0.0999$  (2365). GOF = 1.110 (Table S1).

Crystallographic data (keto form, measured at 300 K): CCDC 2328438, C<sub>12</sub>H<sub>8</sub>N<sub>2</sub>O<sub>2</sub>,  $M = 212.21$ , monoclinic,  $a = 3.7817(2)$ ,  $b = 9.7180(6)$ ,  $c = 12.9407(6) \text{ \AA}$ ,  $\beta = 92.150(5)^\circ$ ,  $V = 475.24(4) \text{ \AA}^3$ ,  $D_{\text{calcd}} = 1.483 \text{ g cm}^{-3}$ , space group  $P2_1$  (no.4),  $Z = 2$ , 2171 reflections measured, 2332 unique ( $R_{\text{int}} = 0.0264$ ), which were used in all calculations. The final  $R_1(\text{reflections}) = 0.0466$  (1698) [ $I > 2\sigma(I)$ ],  $wR_2(\text{reflections}) = 0.1192$  (2332). GOF = 1.043 (Table S1).

**Crystal of PD2:** A suitable crystal of **PD2 (enol form)**, appearing as a clear yellow needle, was recrystallized from an ethanol solvent as an air-stable, clear yellow needle crystal.

Crystallographic data (enol form, measured at 100 K): CCDC 2328440, C<sub>14</sub>H<sub>12</sub>N<sub>2</sub>O<sub>3</sub>, *M* = 256.26, monoclinic, *a* = 23.2329(10), *b* = 4.8344(2), *c* = 23.5477(11) Å, *β* = 116.157(6)°, *V* = 2374.0(2) Å<sup>3</sup>, *D*<sub>calcd</sub> = 1.434 g cm<sup>-3</sup>, space group *P*2<sub>1</sub>/*n* (no.14), *Z* = 8, 12554 reflections measured, 5665 unique (*R*<sub>int</sub> = 0.0326), which were used in all calculations. The final *R*<sub>1</sub>(reflections) = 0.0425 (4321) [*I* > 2σ(*I*)], *wR*<sub>2</sub>(reflections) = 0.1078 (5665). GOF = 1.061 (Table S1).

Crystallographic data (enol form, measured at 300 K): CCDC 2328442, C<sub>14</sub>H<sub>12</sub>N<sub>2</sub>O<sub>3</sub>, *M* = 256.26, monoclinic, *a* = 23.4299(13), *b* = 4.9040(2), *c* = 23.6545(14) Å, *β* = 115.944(7)°, *V* = 2444.0(3) Å<sup>3</sup>, *D*<sub>calcd</sub> = 1.393 g cm<sup>-3</sup>, space group *P*2<sub>1</sub>/*n* (no.14), *Z* = 8, 5544 reflections measured, 6994 unique (*R*<sub>int</sub> = 0.0412), which were used in all calculations. The final *R*<sub>1</sub>(reflections) = 0.0490 (3855) [*I* > 2σ(*I*)], *wR*<sub>2</sub>(reflections) = 0.1313 (6994). GOF = 1.003 (Table S1).

**Table S1** Crystal data and structure refinement parameters for **PD1** [CCDC 2328436 (100 K) and 2328438 (300 K)] and **PD2** [CCDC 2328440 (100 K) and 2328442 (300 K)].

| Compound                                                                           | <b>PD1</b><br>(measured at 100 K)                               | <b>PD1</b><br>(measured at 300 K)                               | <b>PD2</b><br>(measured at 100 K)                               | <b>PD2</b><br>(measured at 300 K)                               |
|------------------------------------------------------------------------------------|-----------------------------------------------------------------|-----------------------------------------------------------------|-----------------------------------------------------------------|-----------------------------------------------------------------|
| Molecular formula                                                                  | C <sub>12</sub> H <sub>8</sub> N <sub>2</sub> O <sub>2</sub>    | C <sub>12</sub> H <sub>8</sub> N <sub>2</sub> O <sub>2</sub>    | C <sub>14</sub> H <sub>12</sub> N <sub>2</sub> O <sub>3</sub>   | C <sub>14</sub> H <sub>12</sub> N <sub>2</sub> O <sub>3</sub>   |
| Formula weight                                                                     | 212.20                                                          | 212.20                                                          | 256.26                                                          | 256.26                                                          |
| Number of reflections used for unit cell determination (2 $\theta$ range/°)        | 4946(5.26-63.55)                                                | 2171(5.25-63.73)                                                | 12554(5.21-59.81)                                               | 5544(3.85-57.77)                                                |
| Temperature/K                                                                      | 100.00(10)                                                      | 299.50(18)                                                      | 100.00(10)                                                      | 299.68(16)                                                      |
| Crystal System                                                                     | monoclinic                                                      | monoclinic                                                      | monoclinic                                                      | monoclinic                                                      |
| Space group                                                                        | <i>P</i> 2 <sub>1</sub>                                         | <i>P</i> 2 <sub>1</sub>                                         | <i>P</i> 2 <sub>1</sub> / <i>n</i>                              | <i>P</i> 2 <sub>1</sub> / <i>n</i>                              |
| <i>a</i> /Å                                                                        | 3.7249(2)                                                       | 3.7817(2)                                                       | 23.2329(10)                                                     | 23.4299(13)                                                     |
| <i>b</i> /Å                                                                        | 9.6327(4)                                                       | 9.7180(6)                                                       | 4.8344(2)                                                       | 4.9040(2)                                                       |
| <i>c</i> /Å                                                                        | 12.9466(5)                                                      | 12.9407(6)                                                      | 23.5477(11)                                                     | 23.6545(14)                                                     |
| $\alpha$ /°                                                                        | 90                                                              | 90                                                              | 90                                                              | 90                                                              |
| $\beta$ /°                                                                         | 92.843(3)                                                       | 92.150(5)                                                       | 116.157(6)                                                      | 115.944(7)                                                      |
| $\gamma$ /°                                                                        | 90                                                              | 90                                                              | 90                                                              | 90                                                              |
| <i>V</i> /Å <sup>3</sup>                                                           | 463.96(4)                                                       | 475.24(4)                                                       | 2374.0(2)                                                       | 2444.0(3)                                                       |
| <i>Z</i>                                                                           | 2                                                               | 2                                                               | 8                                                               | 8                                                               |
| <i>D</i> <sub>c</sub> /g cm <sup>-3</sup>                                          | 1.519                                                           | 1.483                                                           | 1.434                                                           | 1.393                                                           |
| <i>F</i> (000)                                                                     | 220                                                             | 220                                                             | 1072                                                            | 1072                                                            |
| Radiation                                                                          | Mo-K $\alpha$ ( $\lambda$ = 0.71073 Å)                          |
| Crystal size/mm <sup>3</sup>                                                       | 0.217×0.109×0.071                                               | 0.298×0.068×0.024                                               | 0.15×0.07×0.07                                                  | 0.144×0.041×0.013                                               |
| Range of indices <i>h</i> ; <i>k</i> ; <i>l</i>                                    | -5, 5; -11, 13; -19, 19                                         | -5, 4; -10, 14; -18, 19                                         | -31, 29; -5, 6; -24, 30                                         | -31, 33; -7, 5; -31, 34                                         |
| Reflections collected (unique)                                                     | 2365                                                            | 2332                                                            | 5665                                                            | 6994                                                            |
| Reflection observed with <i>I</i> <sub>0</sub> >2 $\sigma$ <i>I</i> <sub>0</sub>   | 2153                                                            | 1698                                                            | 4321                                                            | 3855                                                            |
| Number of parameters                                                               | 146                                                             | 146                                                             | 347                                                             | 347                                                             |
| Final <i>R</i> indexes [ <i>I</i> <sub>0</sub> >2 $\sigma$ <i>I</i> <sub>0</sub> ] | <i>R</i> <sub>1</sub> = 0.0349, <i>wR</i> <sub>2</sub> = 0.0981 | <i>R</i> <sub>1</sub> = 0.0466, <i>wR</i> <sub>2</sub> = 0.1192 | <i>R</i> <sub>1</sub> = 0.0425, <i>wR</i> <sub>2</sub> = 0.1011 | <i>R</i> <sub>1</sub> = 0.0490, <i>wR</i> <sub>2</sub> = 0.1105 |
| Final <i>R</i> indexes [all data]                                                  | <i>R</i> <sub>1</sub> = 0.0384, <i>wR</i> <sub>2</sub> = 0.0999 | <i>R</i> <sub>1</sub> = 0.0688, <i>wR</i> <sub>2</sub> = 0.1294 | <i>R</i> <sub>1</sub> = 0.0610, <i>wR</i> <sub>2</sub> = 0.1078 | <i>R</i> <sub>1</sub> = 0.1106, <i>wR</i> <sub>2</sub> = 0.1313 |
| Goodness-of-fit on <i>F</i> <sup>2</sup>                                           | 1.110                                                           | 1.043                                                           | 1.061                                                           | 1.003                                                           |
| Max. Shift/Error in final cycle                                                    | 0.000                                                           | 0.000                                                           | 0.001                                                           | 0.001                                                           |
| Max. peak in final diff. map/e Å <sup>-3</sup>                                     | 0.339                                                           | 0.268                                                           | 0.282                                                           | 0.230                                                           |
| Min. peak in final diff. map/e Å <sup>-3</sup>                                     | -0.233                                                          | -0.235                                                          | -0.197                                                          | -0.157                                                          |

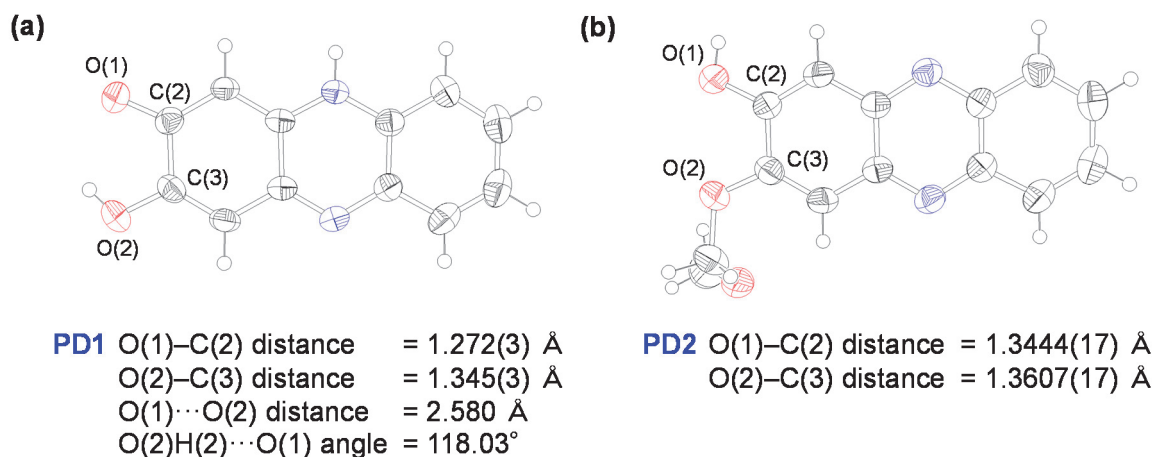

**Fig. S1** X-ray crystal structures of (a) **PD1** and (b) **PD2**, measured at 300 K. Ellipsoids are shown at the 50 % probability level.

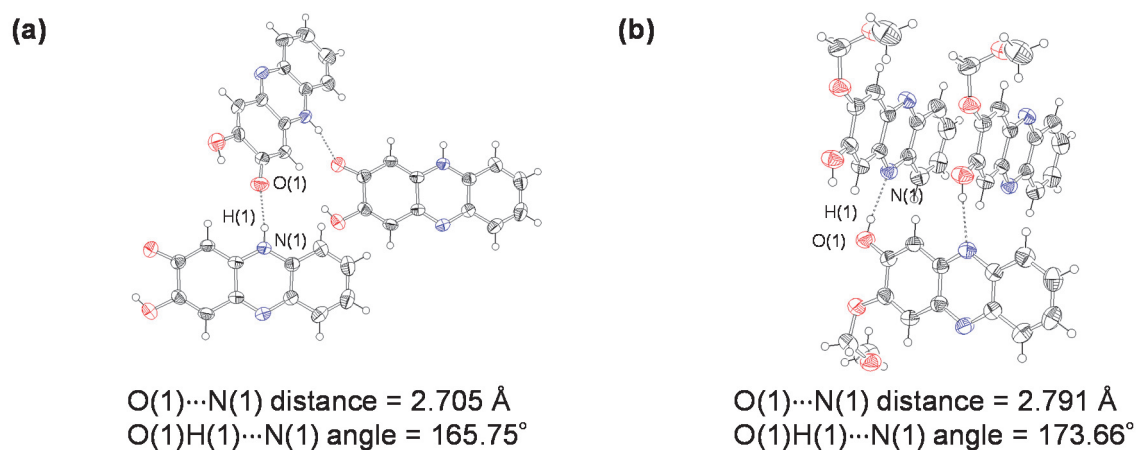

**Fig. S2** Crystal packing structures of (a) **PD1** and (b) **PD2**, measured at 300 K. Ellipsoids are shown at the 50 % probability level.

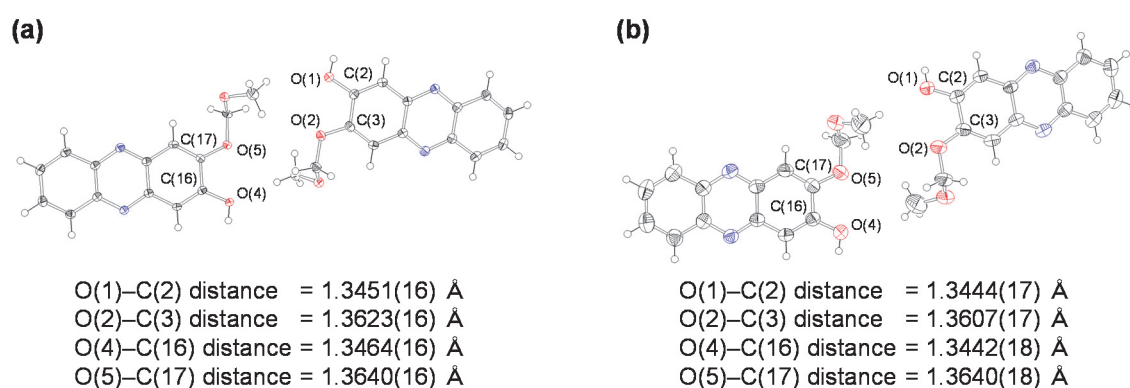

**Fig. S3** X-ray crystal structures of **PD2**, measured at (a) 100 K and (b) 300 K. Ellipsoids are shown at the 50 % probability level.



#### 4. NMR measurements

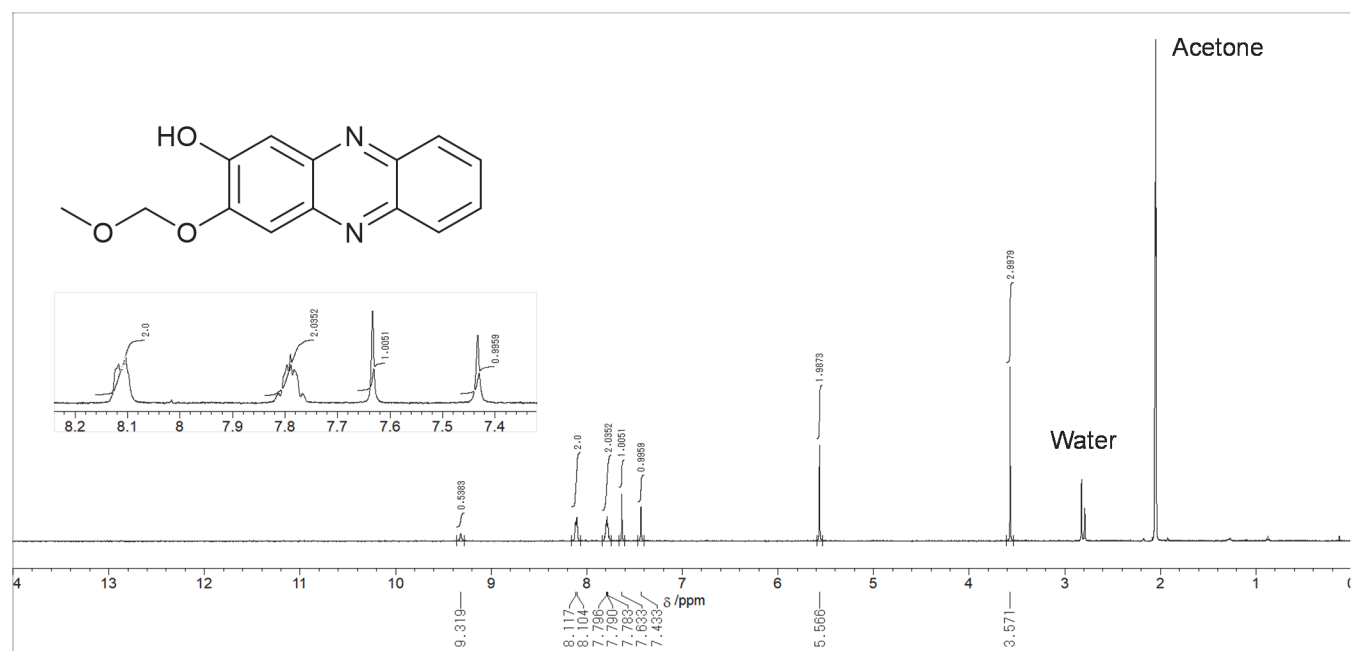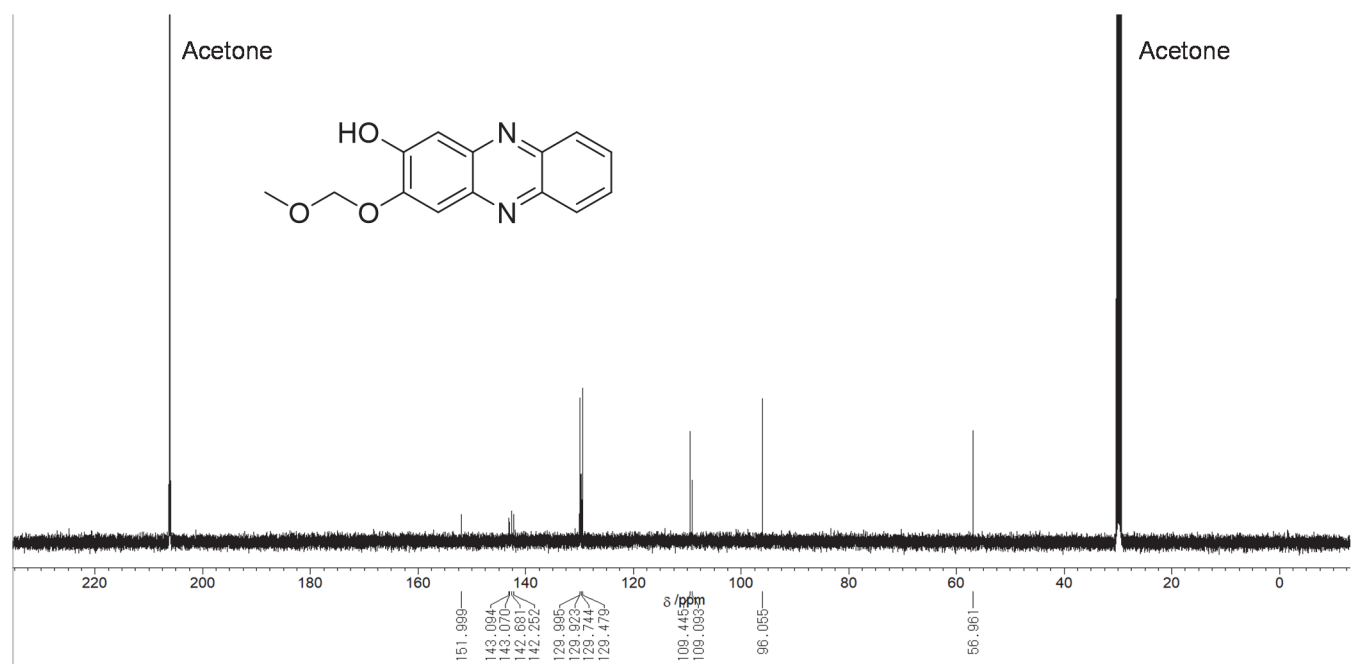

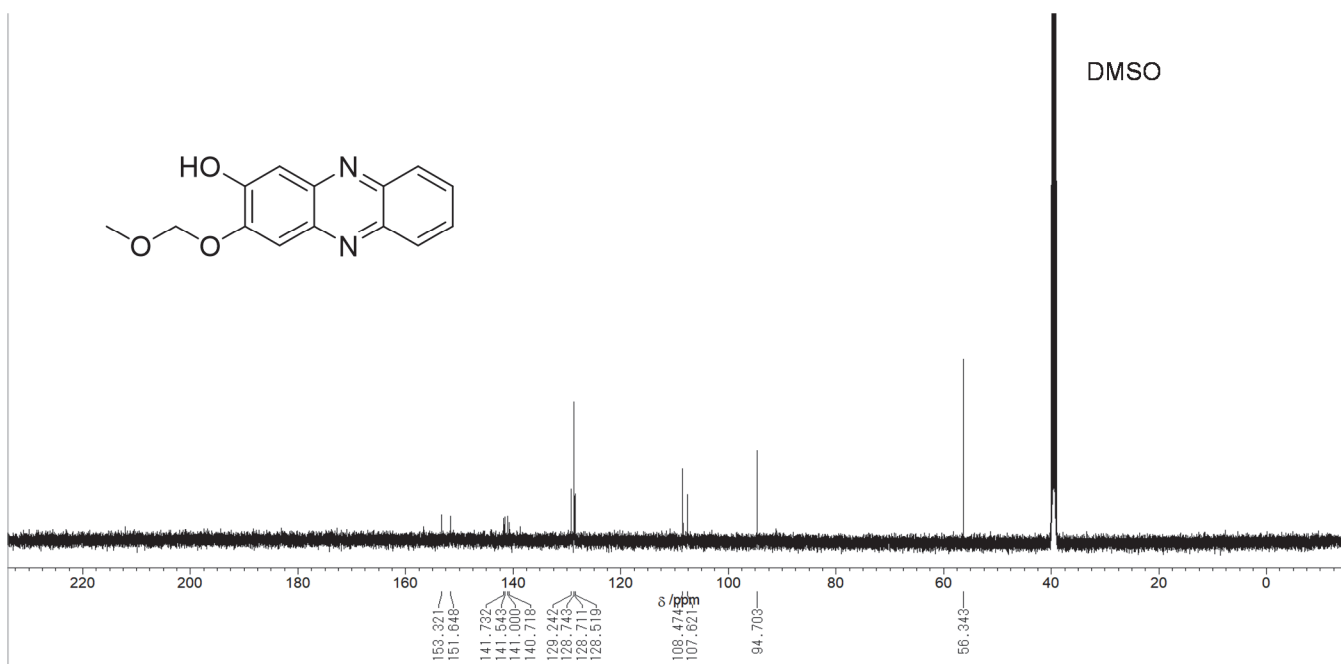

Fig. S6  $^{13}\text{C}$  NMR spectrum of PD2 in DMSO- $d_6$ .

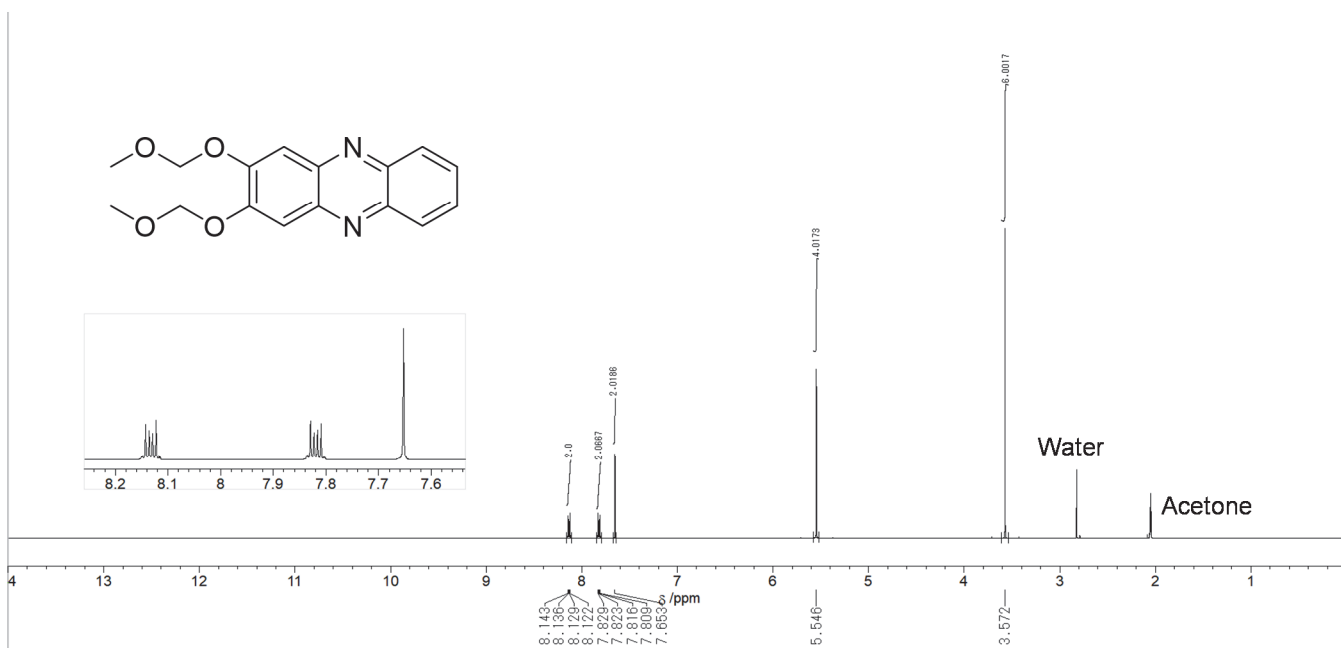

Fig. S7  $^1\text{H}$  NMR spectrum of PD3 in Acetone- $d_6$ .

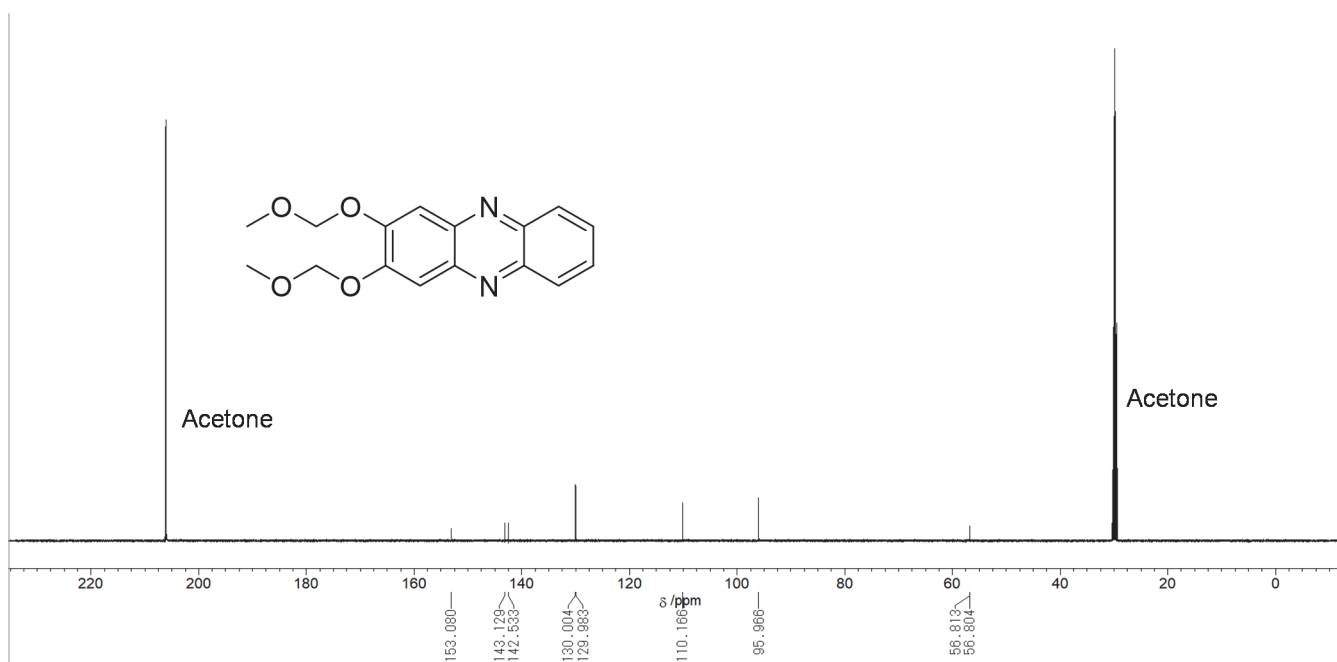

**Fig. S8**  $^{13}\text{C}$  NMR spectrum of PD3 in Acetone- $d_6$ .

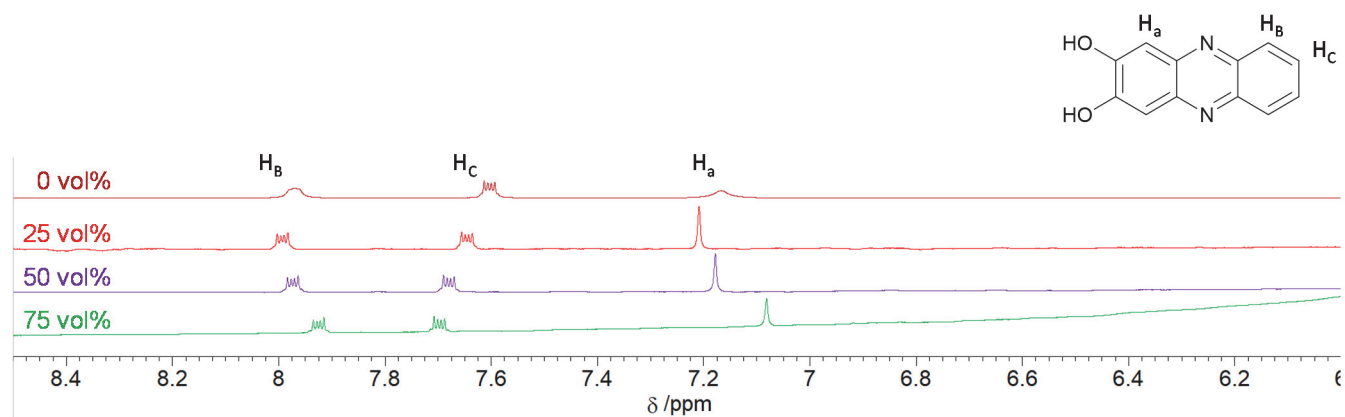

**Fig. S9**  $^1\text{H}$  NMR spectra of PD1 in THF- $d_8$  containing H $_2$ O (0–75 vol%). The intensity of H $_A$  peaks doesn't change with increasing H $_2$ O concentration (1→0.97→1.04→0.97).

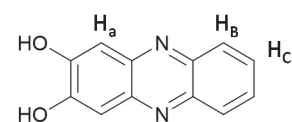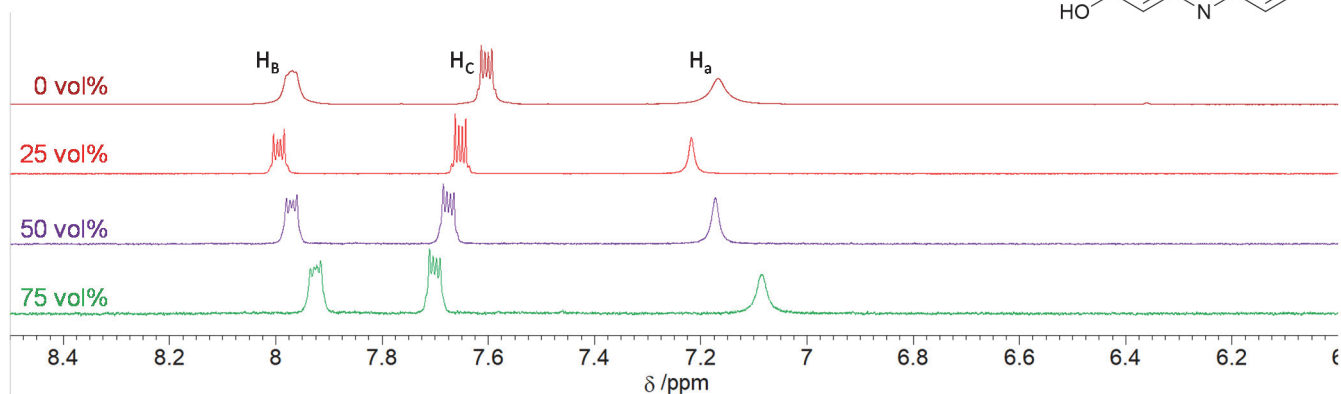

**Fig. S10**  $^1\text{H}$  NMR spectra of **PD1** in  $\text{THF-}d_8$  containing  $\text{D}_2\text{O}$  (0–75 vol%). The intensity of  $\text{H}_\text{A}$  peaks decrease as increasing  $\text{D}_2\text{O}$  concentration (1→0.84→0.82→0.78). NMR measurements were performed immediately after sample preparation.

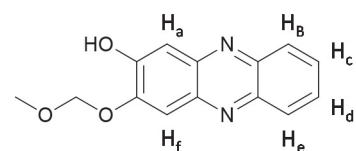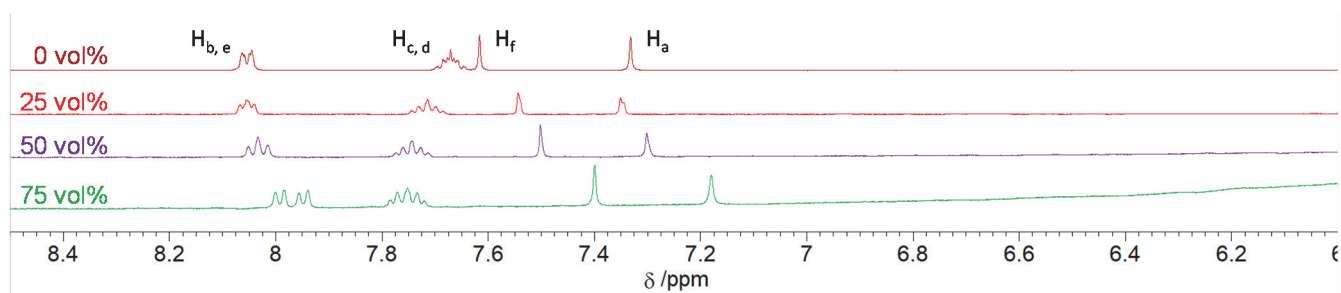

**Fig. S11**  $^1\text{H}$  NMR spectra of **PD2** in  $\text{THF-}d_8$  containing  $\text{H}_2\text{O}$  (0–75 vol%). The intensities of  $\text{H}_\text{A}$  and  $\text{H}_\text{F}$  peaks don't change with increasing  $\text{H}_2\text{O}$  concentration ( $\text{H}_\text{A}$ : 1→0.98→0.92→0.88,  $\text{H}_\text{F}$ : 1→1.01→1→0.96). NMR measurements were performed immediately after sample preparation. The baseline distortion of 75 vol% spectrum is because of water.

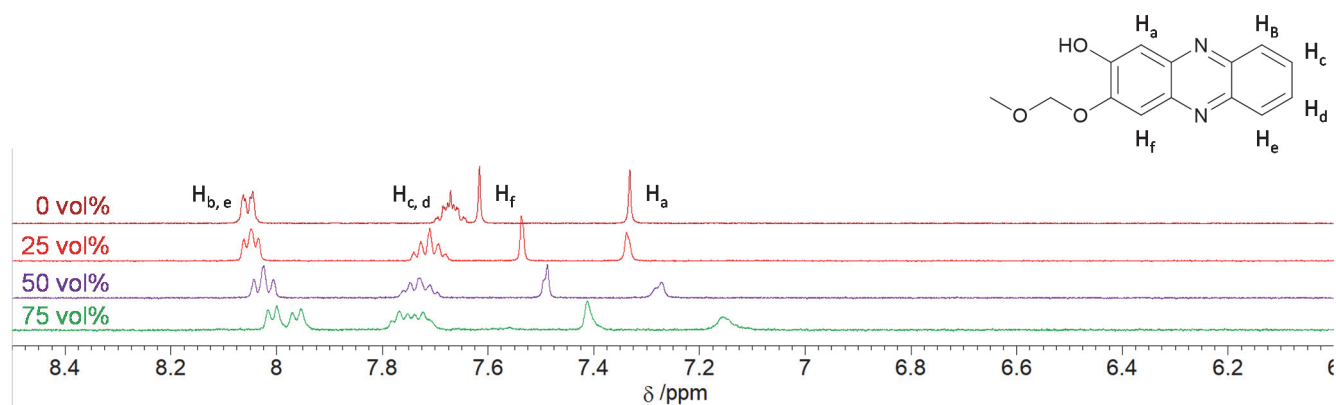

**Fig. S12**  $^1\text{H}$  NMR spectra of **PD2** in  $\text{THF-}d_8$  containing  $\text{D}_2\text{O}$  (0–75 vol%). The intensity of  $\text{H}_A$  peaks decrease as increasing  $\text{D}_2\text{O}$  concentration ( $1 \rightarrow 0.91 \rightarrow 0.85 \rightarrow 0.82$ ) whereas that of  $\text{H}_F$  signals have no change ( $1 \rightarrow 1.04 \rightarrow 1.05 \rightarrow 0.98$ ). NMR measurements were performed immediately after sample preparation.

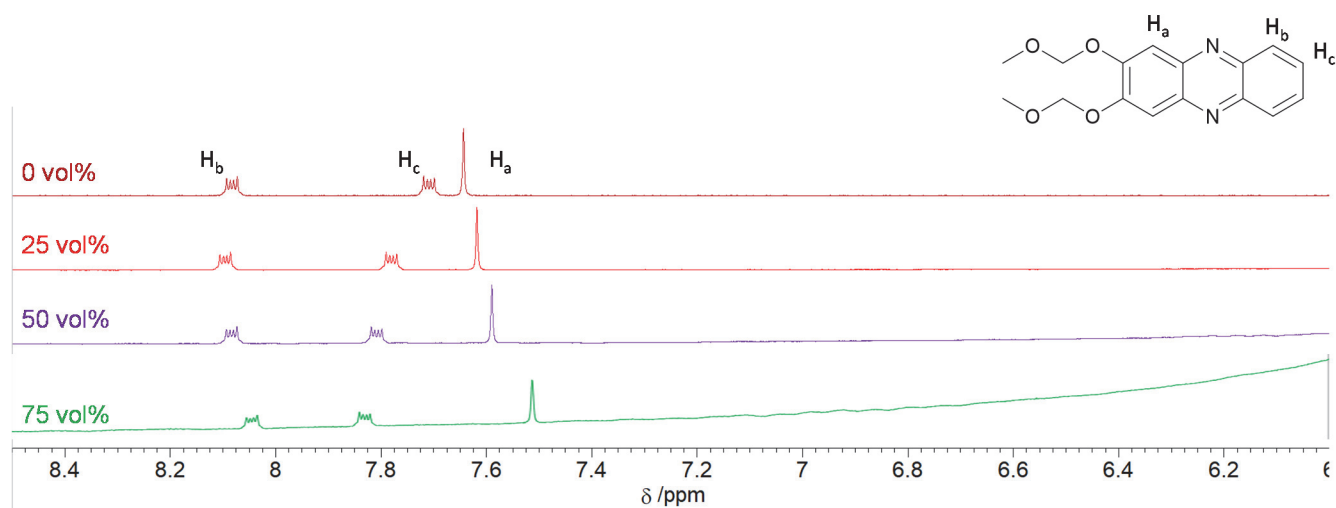

**Fig. S13**  $^1\text{H}$  NMR spectra of **PD3** in  $\text{THF-}d_8$  containing  $\text{H}_2\text{O}$  (0–75 vol%). The intensity of  $\text{H}_A$  peaks doesn't change with increasing  $\text{H}_2\text{O}$  concentration ( $1 \rightarrow 1.01 \rightarrow 1.02 \rightarrow 1.04$ ). NMR measurements were performed immediately after sample preparation. The baseline distortion of 75 vol% spectrum is because of water.

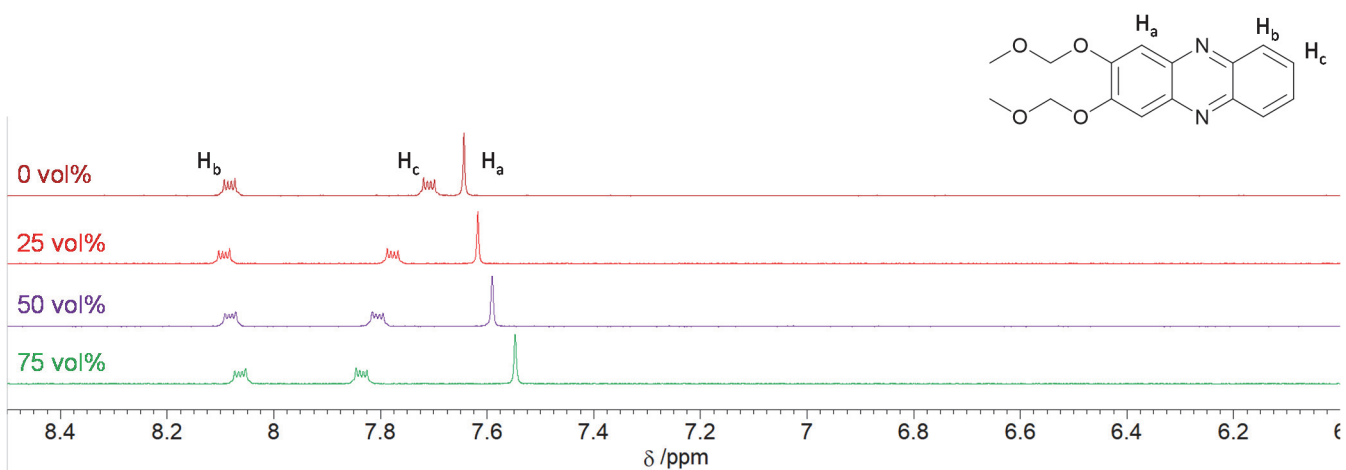

**Fig. S14** <sup>1</sup>H NMR spectra of **PD3** in THF-*d*<sub>8</sub> containing D<sub>2</sub>O (0–75 vol%). The intensity of H<sub>A</sub> peaks doesn't change with increasing D<sub>2</sub>O concentration (1→1.01→1.04→1.03). NMR measurements were performed immediately after sample preparation.

## 5. Theoretical calculations

The Gaussian 16 program<sup>S2</sup> was used for density functional theory (DFT) and time-dependent DFT (TD-DFT) calculations. For the convenience of calculations, the methoxymethyl groups of **PD2-E**, **PD2-K**, and **PD3** were replaced with the methoxy groups. The S<sub>0</sub> geometries of *anti*-**PD1-E**, *syn*-**PD1-E**, *anti*-**PD1-K**, *syn*-**PD1-K**, *anti*-**PD2-E**, *syn*-**PD2-E**, **PD2-K**, and **PD3** were optimized with frequency calculations at the B3LYP/6-311G(d,p) level. There are no imaginary frequencies for all optimized structures. The TD-DFT calculations for *anti*-**PD1-E**, *syn*-**PD1-E**, *anti*-**PD1-K**, *syn*-**PD1-K**, *anti*-**PD2-E**, *syn*-**PD2-E**, **PD2-K**, and **PD3** were performed using the optimized S<sub>0</sub> geometry at the B3LYP/6-311G(d,p) level.

**Table S2** Cartesian coordinates of *anti*-PD1-E.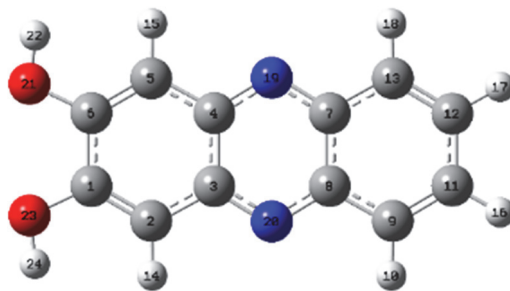

| Tag | Symbol | X         | Y         | Z        |
|-----|--------|-----------|-----------|----------|
| 1   | C      | -2.869691 | -0.722496 | 0.000000 |
| 2   | C      | -1.688539 | -1.408956 | 0.000000 |
| 3   | C      | -0.439022 | -0.723078 | 0.000000 |
| 4   | C      | -0.439022 | 0.723078  | 0.000000 |
| 5   | C      | -1.688539 | 1.408956  | 0.000000 |
| 6   | C      | -2.869691 | 0.722496  | 0.000000 |
| 7   | C      | 1.845435  | 0.720318  | 0.000000 |
| 8   | C      | 1.845435  | -0.720318 | 0.000000 |
| 9   | C      | 3.091720  | -1.410729 | 0.000000 |
| 10  | H      | 3.063222  | -2.493756 | 0.000000 |
| 11  | C      | 4.268012  | -0.712019 | 0.000000 |
| 12  | C      | 4.268012  | 0.712019  | 0.000000 |
| 13  | C      | 3.091720  | 1.410729  | 0.000000 |
| 14  | H      | -1.666905 | -2.493455 | 0.000000 |
| 15  | H      | -1.666905 | 2.493455  | 0.000000 |
| 16  | H      | 5.213998  | -1.241560 | 0.000000 |
| 17  | H      | 5.213998  | 1.241560  | 0.000000 |
| 18  | H      | 3.063222  | 2.493756  | 0.000000 |
| 19  | N      | 0.698276  | 1.420527  | 0.000000 |
| 20  | N      | 0.698276  | -1.420527 | 0.000000 |
| 21  | O      | -4.094720 | 1.301959  | 0.000000 |
| 22  | H      | -3.987983 | 2.259638  | 0.000000 |
| 23  | O      | -4.094720 | -1.301959 | 0.000000 |
| 24  | H      | -3.987983 | -2.259638 | 0.000000 |



**Table S3** Cartesian coordinates of *syn*-PD1-E.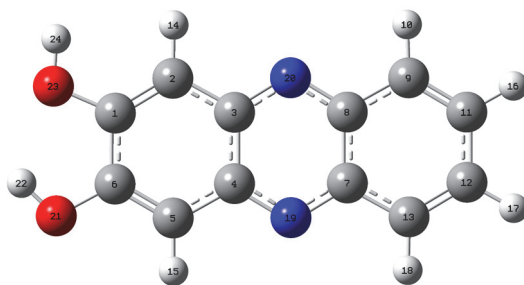

| Tag | Symbol | X         | Y         | Z        |
|-----|--------|-----------|-----------|----------|
| 1   | C      | 2.850320  | 0.700126  | 0.000000 |
| 2   | C      | 1.685421  | 1.405464  | 0.000000 |
| 3   | C      | 0.435679  | 0.715991  | 0.000000 |
| 4   | C      | 0.435956  | -0.732199 | 0.000000 |
| 5   | C      | 1.678578  | -1.429944 | 0.000000 |
| 6   | C      | 2.857057  | -0.741554 | 0.000000 |
| 7   | C      | -1.850815 | -0.719214 | 0.000000 |
| 8   | C      | -1.848053 | 0.721383  | 0.000000 |
| 9   | C      | -3.092117 | 1.415915  | 0.000000 |
| 10  | H      | -3.060835 | 2.498871  | 0.000000 |
| 11  | C      | -4.269987 | 0.720289  | 0.000000 |
| 12  | C      | -4.273484 | -0.704233 | 0.000000 |
| 13  | C      | -3.099661 | -1.406422 | 0.000000 |
| 14  | H      | 1.667929  | 2.489780  | 0.000000 |
| 15  | H      | 1.671990  | -2.511793 | 0.000000 |
| 16  | H      | -5.214725 | 1.252017  | 0.000000 |
| 17  | H      | -5.221007 | -1.231022 | 0.000000 |
| 18  | H      | -3.073885 | -2.489438 | 0.000000 |
| 19  | N      | -0.707365 | -1.422986 | 0.000000 |
| 20  | N      | -0.698665 | 1.417281  | 0.000000 |
| 21  | O      | 4.047365  | -1.386859 | 0.000000 |
| 22  | H      | 4.749937  | -0.723309 | 0.000000 |
| 23  | O      | 4.104915  | 1.246081  | 0.000000 |
| 24  | H      | 4.051205  | 2.207441  | 0.000000 |

**Table S4** Cartesian coordinates of *anti*-PD1-K.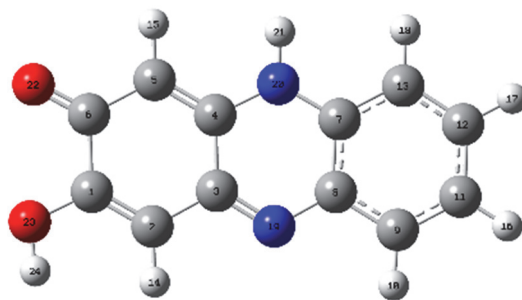

| Tag | Symbol | X         | Y         | Z         |
|-----|--------|-----------|-----------|-----------|
| 1   | C      | 2.943336  | -0.710779 | -0.000330 |
| 2   | C      | 1.766209  | -1.384980 | -0.000345 |
| 3   | C      | 0.506841  | -0.695078 | -0.000156 |
| 4   | C      | 0.542708  | 0.778086  | -0.000260 |
| 5   | C      | 1.721941  | 1.464119  | 0.000041  |
| 6   | C      | 3.003494  | 0.793179  | 0.000329  |
| 7   | C      | -1.880781 | 0.697945  | -0.000375 |
| 8   | C      | -1.809634 | -0.717034 | 0.000220  |
| 9   | C      | -3.009946 | -1.450847 | 0.000714  |
| 10  | H      | -2.932663 | -2.531141 | 0.001137  |
| 11  | C      | -4.232899 | -0.805904 | 0.000554  |
| 12  | C      | -4.285115 | 0.596919  | -0.000010 |
| 13  | C      | -3.121491 | 1.348535  | -0.000503 |
| 14  | H      | 1.721928  | -2.469282 | -0.000461 |
| 15  | H      | 1.747619  | 2.548287  | 0.000197  |
| 16  | H      | -5.151235 | -1.380243 | 0.000910  |
| 17  | H      | -5.244185 | 1.101493  | -0.000130 |
| 18  | H      | -3.162563 | 2.433000  | -0.000924 |
| 19  | N      | -0.605816 | -1.381669 | 0.000110  |
| 20  | N      | -0.688664 | 1.387506  | -0.000704 |
| 21  | H      | -0.716180 | 2.397828  | -0.001089 |
| 22  | O      | 4.081697  | 1.372422  | 0.001458  |
| 23  | O      | 4.153839  | -1.294045 | -0.000678 |
| 24  | H      | 4.046389  | -2.252767 | -0.000997 |

**Table S5** Cartesian coordinates of *syn*-PD1-K.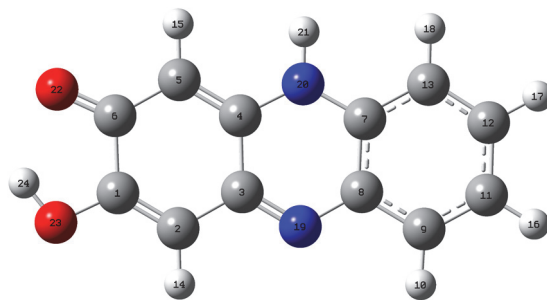

| Tag | Symbol | X         | Y         | Z         |
|-----|--------|-----------|-----------|-----------|
| 1   | C      | -2.918020 | -0.740562 | 0.000054  |
| 2   | C      | -1.749219 | -1.428135 | 0.000166  |
| 3   | C      | -0.503009 | -0.721253 | 0.000188  |
| 4   | C      | -0.543718 | 0.756422  | 0.000310  |
| 5   | C      | -1.725408 | 1.453019  | 0.000053  |
| 6   | C      | -2.971912 | 0.755829  | -0.000084 |
| 7   | C      | 1.877655  | 0.697139  | 0.000105  |
| 8   | C      | 1.817219  | -0.718421 | 0.000023  |
| 9   | C      | 3.027447  | -1.440372 | -0.000186 |
| 10  | H      | 2.961374  | -2.521302 | -0.000251 |
| 11  | C      | 4.241269  | -0.781828 | -0.000132 |
| 12  | C      | 4.280676  | 0.623220  | -0.000092 |
| 13  | C      | 3.110866  | 1.362790  | -0.000005 |
| 14  | H      | -1.719393 | -2.509522 | 0.000203  |
| 15  | H      | -1.748388 | 2.537024  | -0.000199 |
| 16  | H      | 5.165938  | -1.345994 | -0.000172 |
| 17  | H      | 5.235207  | 1.136124  | -0.000162 |
| 18  | H      | 3.140151  | 2.447661  | -0.000029 |
| 19  | N      | 0.624058  | -1.391740 | 0.000036  |
| 20  | N      | 0.677699  | 1.372426  | 0.000158  |
| 21  | H      | 0.696055  | 2.383573  | -0.000081 |
| 22  | O      | -4.099452 | 1.268796  | -0.000269 |
| 23  | O      | -4.121202 | -1.312552 | -0.000074 |
| 24  | H      | -4.741090 | -0.549405 | -0.000319 |

**Table S6** Cartesian coordinates of *anti*-PD2-E.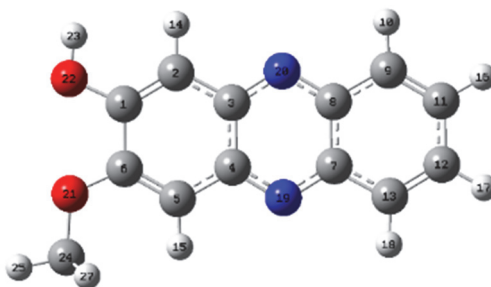

| Tag | Symbol | X         | Y         | Z         |
|-----|--------|-----------|-----------|-----------|
| 1   | C      | 2.462186  | 1.194666  | 0.000000  |
| 2   | C      | 1.214428  | 1.748016  | 0.000000  |
| 3   | C      | 0.047193  | 0.929357  | 0.000000  |
| 4   | C      | 0.208955  | -0.506769 | 0.000000  |
| 5   | C      | 1.525967  | -1.057716 | 0.000000  |
| 6   | C      | 2.627086  | -0.245353 | 0.000000  |
| 7   | C      | -2.062245 | -0.757796 | 0.000000  |
| 8   | C      | -2.222425 | 0.673149  | 0.000000  |
| 9   | C      | -3.537333 | 1.220586  | 0.000000  |
| 10  | H      | -3.629748 | 2.300059  | 0.000000  |
| 11  | C      | -4.628972 | 0.395238  | 0.000000  |
| 12  | C      | -4.470616 | -1.019520 | 0.000000  |
| 13  | C      | -3.223376 | -1.582727 | 0.000000  |
| 14  | H      | 1.074961  | 2.823843  | 0.000000  |
| 15  | H      | 1.603673  | -2.135370 | 0.000000  |
| 16  | H      | -5.627920 | 0.816481  | 0.000000  |
| 17  | H      | -5.351631 | -1.651285 | 0.000000  |
| 18  | H      | -3.074511 | -2.655880 | 0.000000  |
| 19  | N      | -0.843440 | -1.325913 | 0.000000  |
| 20  | N      | -1.159535 | 1.496871  | 0.000000  |
| 21  | O      | 3.913224  | -0.653901 | 0.000000  |
| 22  | O      | 3.613220  | 1.910633  | 0.000000  |
| 23  | H      | 3.394758  | 2.849228  | 0.000000  |
| 24  | C      | 4.168959  | -2.054216 | 0.000000  |
| 25  | H      | 5.252177  | -2.155771 | 0.000000  |
| 26  | H      | 3.754338  | -2.531674 | 0.893845  |
| 27  | H      | 3.754338  | -2.531674 | -0.893846 |

**Table S7** Cartesian coordinates of *syn*-PD2-E.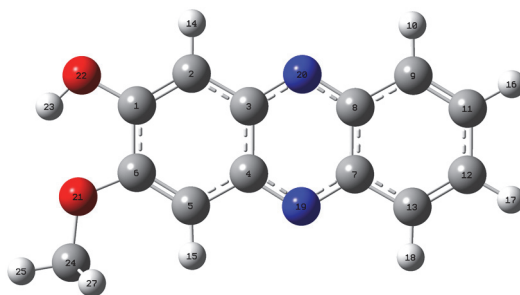

| Tag | Symbol | X         | Y         | Z         |
|-----|--------|-----------|-----------|-----------|
| 1   | C      | -2.446503 | -1.204204 | 0.000000  |
| 2   | C      | -1.202443 | -1.762602 | 0.000000  |
| 3   | C      | -0.041697 | -0.935033 | 0.000000  |
| 4   | C      | -0.200063 | 0.503802  | 0.000000  |
| 5   | C      | -1.516652 | 1.060233  | 0.000000  |
| 6   | C      | -2.601411 | 0.233751  | 0.000000  |
| 7   | C      | 2.070104  | 0.758138  | 0.000000  |
| 8   | C      | 2.229908  | -0.672855 | 0.000000  |
| 9   | C      | 3.545948  | -1.219542 | 0.000000  |
| 10  | H      | 3.638761  | -2.298916 | 0.000000  |
| 11  | C      | 4.636576  | -0.393356 | 0.000000  |
| 12  | C      | 4.477741  | 1.021836  | 0.000000  |
| 13  | C      | 3.230413  | 1.584419  | 0.000000  |
| 14  | H      | -1.080381 | -2.837594 | 0.000000  |
| 15  | H      | -1.598936 | 2.138005  | 0.000000  |
| 16  | H      | 5.635868  | -0.813866 | 0.000000  |
| 17  | H      | 5.358638  | 1.653788  | 0.000000  |
| 18  | H      | 3.081074  | 2.657530  | 0.000000  |
| 19  | N      | 0.850668  | 1.324296  | 0.000000  |
| 20  | N      | 1.169326  | -1.497549 | 0.000000  |
| 21  | O      | -3.910168 | 0.613686  | 0.000000  |
| 22  | O      | -3.560629 | -1.972237 | 0.000000  |
| 23  | H      | -4.324259 | -1.378783 | 0.000000  |
| 24  | C      | -4.210761 | 2.008107  | 0.000000  |
| 25  | H      | -5.296336 | 2.080648  | 0.000000  |
| 26  | H      | -3.807481 | 2.492104  | 0.894406  |
| 27  | H      | -3.807481 | 2.492104  | -0.894406 |

**Table S8** Cartesian coordinates of **PD2-K**.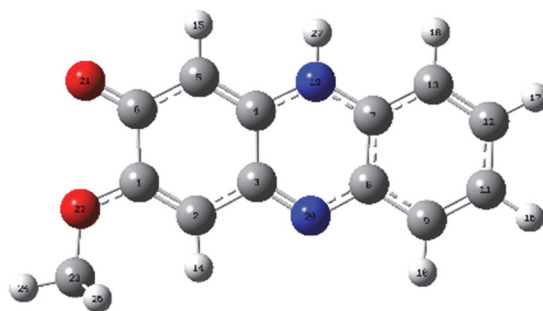

| Tag | Symbol | X         | Y         | Z         |
|-----|--------|-----------|-----------|-----------|
| 1   | C      | -2.696023 | -0.221255 | -0.000099 |
| 2   | C      | -1.598523 | -1.023369 | -0.000143 |
| 3   | C      | -0.271032 | -0.472451 | -0.000085 |
| 4   | C      | -0.139416 | 0.994482  | -0.000011 |
| 5   | C      | -1.234178 | 1.807598  | -0.000016 |
| 6   | C      | -2.582536 | 1.283621  | -0.000040 |
| 7   | C      | 2.259807  | 0.642895  | 0.000036  |
| 8   | C      | 2.029347  | -0.754871 | -0.000024 |
| 9   | C      | 3.139209  | -1.619088 | -0.000049 |
| 10  | H      | 2.940587  | -2.683812 | -0.000111 |
| 11  | C      | 4.427447  | -1.116312 | -0.000003 |
| 12  | C      | 4.637626  | 0.271372  | 0.000083  |
| 13  | C      | 3.565826  | 1.149366  | 0.000093  |
| 14  | H      | -1.656801 | -2.102841 | -0.000239 |
| 15  | H      | -1.139459 | 2.887990  | -0.000023 |
| 16  | H      | 5.275017  | -1.790781 | -0.000024 |
| 17  | H      | 5.647460  | 0.664694  | 0.000121  |
| 18  | H      | 3.728835  | 2.222332  | 0.000139  |
| 19  | N      | 1.152652  | 1.462251  | 0.000037  |
| 20  | N      | 0.757842  | -1.279594 | -0.000088 |
| 21  | O      | -3.585555 | 1.984617  | 0.000004  |
| 22  | O      | -3.967739 | -0.635448 | -0.000075 |
| 23  | C      | -4.223432 | -2.036845 | 0.000255  |
| 24  | H      | -5.306439 | -2.138869 | 0.000682  |
| 25  | H      | -3.807516 | -2.512417 | -0.893915 |
| 26  | H      | -3.806826 | -2.512149 | 0.894240  |
| 27  | H      | 1.293302  | 2.463048  | 0.000066  |

**Table S9** Cartesian coordinates of **PD3**.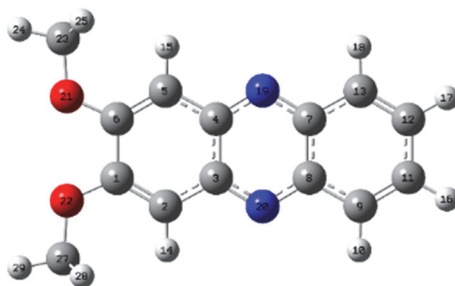

| Tag | Symbol | X         | Y         | Z         |
|-----|--------|-----------|-----------|-----------|
| 1   | C      | 2.331217  | -0.727254 | 0.000000  |
| 2   | C      | 1.148928  | -1.413916 | 0.000000  |
| 3   | C      | -0.099957 | -0.722035 | 0.000000  |
| 4   | C      | -0.099957 | 0.722035  | 0.000000  |
| 5   | C      | 1.148928  | 1.413916  | 0.000000  |
| 6   | C      | 2.331217  | 0.727254  | 0.000000  |
| 7   | C      | -2.384708 | 0.719632  | 0.000000  |
| 8   | C      | -2.384708 | -0.719632 | 0.000000  |
| 9   | C      | -3.630098 | -1.410089 | 0.000000  |
| 10  | H      | -3.601690 | -2.493159 | 0.000000  |
| 11  | C      | -4.807276 | -0.711599 | 0.000000  |
| 12  | C      | -4.807276 | 0.711599  | 0.000000  |
| 13  | C      | -3.630098 | 1.410089  | 0.000000  |
| 14  | H      | 1.108244  | -2.493577 | 0.000000  |
| 15  | H      | 1.108244  | 2.493577  | 0.000000  |
| 16  | H      | -5.753013 | -1.241626 | 0.000000  |
| 17  | H      | -5.753013 | 1.241626  | 0.000000  |
| 18  | H      | -3.601690 | 2.493159  | 0.000000  |
| 19  | N      | -1.235962 | 1.419826  | 0.000000  |
| 20  | N      | -1.235962 | -1.419826 | 0.000000  |
| 21  | O      | 3.562547  | 1.279919  | 0.000000  |
| 22  | O      | 3.562547  | -1.279919 | 0.000000  |
| 23  | C      | 3.657388  | 2.699946  | 0.000000  |
| 24  | H      | 4.722114  | 2.923992  | 0.000000  |
| 25  | H      | 3.191368  | 3.127760  | -0.893674 |
| 26  | H      | 3.191369  | 3.127760  | 0.893674  |
| 27  | C      | 3.657388  | -2.699946 | 0.000000  |
| 28  | H      | 3.191369  | -3.127760 | -0.893674 |
| 29  | H      | 4.722114  | -2.923992 | 0.000000  |
| 30  | H      | 3.191368  | -3.127760 | 0.893674  |

**Table S10** Cartesian coordinates of *anti*-PZ1.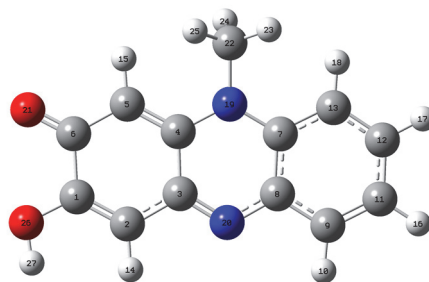

| Tag | Symbol | X        | Y        | Z        |
|-----|--------|----------|----------|----------|
| 1   | C      | -3.01329 | -0.85481 | 0.008706 |
| 2   | C      | -1.84401 | -1.53534 | 0.071829 |
| 3   | C      | -0.57355 | -0.86255 | 0.057195 |
| 4   | C      | -0.56729 | 0.608948 | 0.011604 |
| 5   | C      | -1.74836 | 1.296425 | -0.07371 |
| 6   | C      | -3.04102 | 0.64152  | -0.08469 |
| 7   | C      | 1.846161 | 0.468344 | 0.013246 |
| 8   | C      | 1.729849 | -0.94733 | 0.032746 |
| 9   | C      | 2.893695 | -1.73684 | -0.00441 |
| 10  | H      | 2.757881 | -2.81103 | 0.020344 |
| 11  | C      | 4.145401 | -1.15814 | -0.07638 |
| 12  | C      | 4.252973 | 0.237572 | -0.1212  |
| 13  | C      | 3.125781 | 1.043896 | -0.07993 |
| 14  | H      | -1.80716 | -2.61885 | 0.121194 |
| 15  | H      | -1.79361 | 2.372707 | -0.15256 |
| 16  | H      | 5.034878 | -1.77544 | -0.10749 |
| 17  | H      | 5.228797 | 0.703061 | -0.19785 |
| 18  | H      | 3.249121 | 2.115371 | -0.14571 |
| 19  | N      | 0.675988 | 1.217426 | 0.082158 |
| 20  | N      | 0.514998 | -1.58226 | 0.082579 |
| 21  | O      | -4.10397 | 1.243801 | -0.16789 |
| 22  | C      | 0.72866  | 2.67241  | 0.201816 |
| 23  | H      | 1.664235 | 2.971053 | 0.66527  |
| 24  | H      | 0.63195  | 3.159445 | -0.77349 |
| 25  | H      | -0.08659 | 3.003575 | 0.843655 |
| 26  | O      | -4.23222 | -1.42255 | 0.012843 |
| 27  | H      | -4.13687 | -2.38075 | 0.072895 |



**Table S11** Cartesian coordinates of *syn*-PZ1.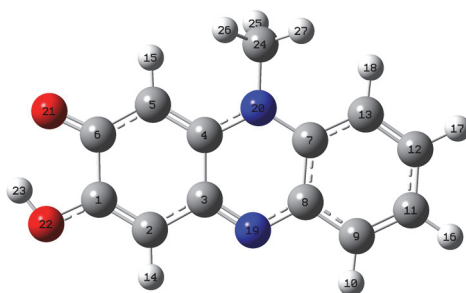

| Tag | Symbol | X        | Y        | Z        |
|-----|--------|----------|----------|----------|
| 1   | C      | 2.986276 | -0.88869 | -0.01034 |
| 2   | C      | 1.823981 | -1.57973 | -0.07106 |
| 3   | C      | 0.567697 | -0.88619 | -0.05648 |
| 4   | C      | 0.568106 | 0.590367 | -0.01071 |
| 5   | C      | 1.754184 | 1.284223 | 0.07027  |
| 6   | C      | 3.010939 | 0.599749 | 0.074651 |
| 7   | C      | -1.84467 | 0.471773 | -0.01132 |
| 8   | C      | -1.7399  | -0.94464 | -0.03404 |
| 9   | C      | -2.91369 | -1.72364 | -0.00128 |
| 10  | H      | -2.78777 | -2.79885 | -0.02869 |
| 11  | C      | -4.15762 | -1.1323  | 0.070187 |
| 12  | C      | -4.2525  | 0.265835 | 0.118809 |
| 13  | C      | -3.11884 | 1.061015 | 0.080932 |
| 14  | H      | 1.797706 | -2.66028 | -0.1158  |
| 15  | H      | 1.802204 | 2.359958 | 0.149494 |
| 16  | H      | -5.05365 | -1.74022 | 0.098219 |
| 17  | H      | -5.22417 | 0.739709 | 0.195579 |
| 18  | H      | -3.23291 | 2.133249 | 0.1497   |
| 19  | N      | -0.53565 | -1.5893  | -0.08303 |
| 20  | N      | -0.66535 | 1.207597 | -0.07435 |
| 21  | O      | 4.125527 | 1.136339 | 0.14734  |
| 22  | O      | 4.196988 | -1.44775 | -0.00974 |
| 23  | H      | 4.80714  | -0.68073 | 0.055667 |
| 24  | C      | -0.70752 | 2.665508 | -0.18847 |
| 25  | H      | -0.59881 | 3.14539  | 0.788573 |
| 26  | H      | 0.103315 | 2.99308  | -0.83704 |
| 27  | H      | -1.64483 | 2.972137 | -0.64188 |

**Table S12** Cartesian coordinates of **PZ2**.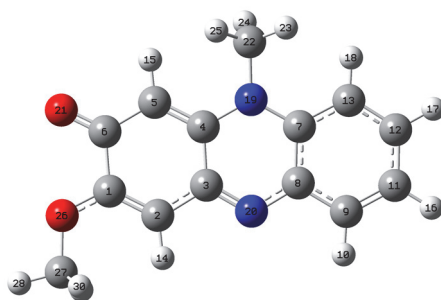

| Tag | Symbol | X        | Y        | Z        |
|-----|--------|----------|----------|----------|
| 1   | C      | 2.800432 | -0.30911 | 0.009061 |
| 2   | C      | 1.726784 | -1.13691 | -0.0528  |
| 3   | C      | 0.380505 | -0.62831 | -0.04508 |
| 4   | C      | 0.181064 | 0.829225 | -0.00949 |
| 5   | C      | 1.262255 | 1.664119 | 0.074815 |
| 6   | C      | 2.628768 | 1.181763 | 0.093926 |
| 7   | C      | -2.19363 | 0.376159 | -0.01688 |
| 8   | C      | -1.89339 | -1.0121  | -0.02595 |
| 9   | C      | -2.94439 | -1.94616 | 0.01383  |
| 10  | H      | -2.66961 | -2.99364 | -0.00284 |
| 11  | C      | -4.26145 | -1.53532 | 0.078203 |
| 12  | C      | -4.55043 | -0.16554 | 0.11264  |
| 13  | C      | -3.53755 | 0.780571 | 0.068778 |
| 14  | H      | 1.812389 | -2.21369 | -0.09627 |
| 15  | H      | 1.167852 | 2.737776 | 0.146768 |
| 16  | H      | -5.06281 | -2.26332 | 0.111218 |
| 17  | H      | -5.5789  | 0.169258 | 0.18318  |
| 18  | H      | -3.79951 | 1.827339 | 0.126614 |
| 19  | N      | -1.13059 | 1.270781 | -0.08815 |
| 20  | N      | -0.60547 | -1.48343 | -0.06829 |
| 21  | O      | 3.600497 | 1.921824 | 0.177376 |
| 22  | C      | -1.37126 | 2.705523 | -0.218   |
| 23  | H      | -2.33606 | 2.877186 | -0.68608 |
| 24  | H      | -1.34211 | 3.207746 | 0.754012 |
| 25  | H      | -0.60346 | 3.135617 | -0.85981 |
| 26  | O      | 4.085293 | -0.68396 | 0.01216  |
| 27  | C      | 4.381266 | -2.0752  | -0.06033 |
| 28  | H      | 5.46668  | -2.14726 | -0.04881 |
| 29  | H      | 3.966345 | -2.61087 | 0.799762 |
| 30  | H      | 3.991392 | -2.51271 | -0.98528 |

**Table S13** Excitation energy, oscillator strength, main transition orbital, and their contribution calculated for singlet states of **PD1–3**, **PZ1**, and **PZ2** derived from TD-DFT calculations at B3LYP/6-311G(d,p) level.

| Dye                        | State          | Excitation energy<br>/ eV | Oscillator<br>strength | Main transition orbital | contribution | Transition |
|----------------------------|----------------|---------------------------|------------------------|-------------------------|--------------|------------|
| <i>anti</i> - <b>PD1-E</b> | S <sub>1</sub> | 3.22                      | 0.025                  | HOMO→LUMO               | 0.98         | $\pi\pi^*$ |
|                            | S <sub>2</sub> | 3.22                      | 0.0012                 | HOMO-2→LUMO             | 0.99         | $n\pi^*$   |
|                            | S <sub>3</sub> | 3.62                      | 0.25                   | HOMO-1→LUMO             | 0.84         | $\pi\pi^*$ |
|                            |                |                           |                        | HOMO→LUMO+1             | 0.16         | $\pi\pi^*$ |
| <i>syn</i> - <b>PD1-E</b>  | S <sub>1</sub> | 3.20                      | 0.0012                 | HOMO-2→LUMO             | 0.99         | $n\pi^*$   |
|                            | S <sub>2</sub> | 3.20                      | 0.037                  | HOMO→LUMO               | 0.97         | $\pi\pi^*$ |
|                            | S <sub>3</sub> | 3.65                      | 0.23                   | HOMO-1→LUMO             | 0.83         | $\pi\pi^*$ |
|                            |                |                           |                        | HOMO→LUMO+1             | 0.16         | $\pi\pi^*$ |
| <i>anti</i> - <b>PD1-K</b> | S <sub>1</sub> | 2.84                      | 0.13                   | HOMO-1→LUMO             | 0.23         | $\pi\pi^*$ |
|                            |                |                           |                        | HOMO→LUMO               | 0.75         | $\pi\pi^*$ |
|                            | S <sub>2</sub> | 2.88                      | 0.00                   | HOMO-2→LUMO             | 0.97         | $n\pi^*$   |
|                            | S <sub>3</sub> | 3.41                      | 0.30                   | HOMO-1→LUMO             | 0.72         | $\pi\pi^*$ |
| HOMO→LUMO                  |                |                           |                        | 0.19                    | $\pi\pi^*$   |            |
| <i>syn</i> - <b>PD1-K</b>  | S <sub>1</sub> | 2.90                      | 0.039                  | HOMO-1→LUMO             | 0.71         | $\pi\pi^*$ |
|                            |                |                           |                        | HOMO→LUMO               | 0.27         | $\pi\pi^*$ |
|                            | S <sub>2</sub> | 3.24                      | 0.40                   | HOMO-1→LUMO             | 0.26         | $\pi\pi^*$ |
|                            |                |                           |                        | HOMO→LUMO               | 0.65         | $\pi\pi^*$ |
| S <sub>3</sub>             | 3.40           | 0.00                      | HOMO-2→LUMO            | 0.97                    | $n\pi^*$     |            |
| <i>anti</i> - <b>PD2-E</b> | S <sub>1</sub> | 3.24                      | 0.021                  | HOMO→LUMO               | 0.98         | $\pi\pi^*$ |
|                            | S <sub>2</sub> | 3.24                      | 0.0012                 | HOMO-2→LUMO             | 0.99         | $n\pi^*$   |
|                            | S <sub>3</sub> | 3.59                      | 0.28                   | HOMO-1→LUMO             | 0.85         | $\pi\pi^*$ |
|                            |                |                           |                        | HOMO→LUMO+1             | 0.15         | $\pi\pi^*$ |
| <i>syn</i> - <b>PD2-E</b>  | S <sub>1</sub> | 3.22                      | 0.036                  | HOMO→LUMO               | 0.97         | $\pi\pi^*$ |
|                            | S <sub>2</sub> | 3.22                      | 0.0012                 | HOMO-2→LUMO             | 0.99         | $n\pi^*$   |
|                            | S <sub>3</sub> | 3.64                      | 0.25                   | HOMO-1→LUMO             | 0.84         | $\pi\pi^*$ |
|                            |                |                           |                        | HOMO→LUMO+1             | 0.16         | $\pi\pi^*$ |
| <b>PD2-K</b>               | S <sub>1</sub> | 2.86                      | 0.13                   | HOMO-1→LUMO             | 0.23         | $\pi\pi^*$ |
|                            |                |                           |                        | HOMO→LUMO               | 0.74         | $\pi\pi^*$ |
|                            | S <sub>2</sub> | 2.89                      | 0.00                   | HOMO-2→LUMO             | 0.97         | $n\pi^*$   |
|                            | S <sub>3</sub> | 3.38                      | 0.32                   | HOMO-1→LUMO             | 0.72         | $\pi\pi^*$ |
| HOMO→LUMO                  |                |                           |                        | 0.20                    | $\pi\pi^*$   |            |
| <b>PD3</b>                 | S <sub>1</sub> | 3.26                      | 0.016                  | HOMO→LUMO               | 0.97         | $\pi\pi^*$ |
|                            | S <sub>2</sub> | 3.26                      | 0.0012                 | HOMO-2→LUMO             | 0.99         | $n\pi^*$   |
|                            | S <sub>3</sub> | 3.58                      | 0.30                   | HOMO-1→LUMO             | 0.86         | $\pi\pi^*$ |
|                            |                |                           |                        | HOMO→LUMO+1             | 0.14         | $\pi\pi^*$ |
| <i>anti</i> - <b>PZ1</b>   | S <sub>1</sub> | 2.86                      | 0.12                   | HOMO-1→LUMO             | 0.21         | $\pi\pi^*$ |
|                            |                |                           |                        | HOMO→LUMO               | 0.68         | $\pi\pi^*$ |

| Dye            | State          | Excitation energy<br>/ eV | Oscillator<br>strength | Main transition orbital | contribution | Transition |
|----------------|----------------|---------------------------|------------------------|-------------------------|--------------|------------|
|                | S <sub>2</sub> | 2.90                      | 0.01                   | HOMO-2→LUMO             | 0.88         | nπ*        |
|                | S <sub>3</sub> | 3.40                      | 0.29                   | HOMO-1→LUMO             | 0.71         | ππ*        |
|                |                |                           |                        | HOMO→LUMO               | 0.20         | ππ*        |
| <i>syn-PZ1</i> | S <sub>1</sub> | 2.91                      | 0.042                  | HOMO-1→LUMO             | 0.71         | ππ*        |
|                |                |                           |                        | HOMO→LUMO               | 0.27         | ππ*        |
|                | S <sub>2</sub> | 3.23                      | 0.39                   | HOMO-1→LUMO             | 0.25         | ππ*        |
|                |                |                           |                        | HOMO→LUMO               | 0.66         | ππ*        |
|                | S <sub>3</sub> | 3.40                      | 0.0019                 | HOMO-2→LUMO             | 0.97         | nπ*        |
| <b>PZ2</b>     | S <sub>1</sub> | 2.87                      | 0.12                   | HOMO-2→LUMO             | 0.11         | nπ*        |
|                |                |                           |                        | HOMO-1→LUMO             | 0.20         | ππ*        |
|                |                |                           |                        | HOMO→LUMO               | 0.66         | ππ*        |
|                | S <sub>2</sub> | 2.91                      | 0.017                  | HOMO-2→LUMO             | 0.85         | nπ*        |
|                | S <sub>3</sub> | 3.37                      | 0.30                   | HOMO-1→LUMO             | 0.72         | ππ*        |
|                |                |                           |                        | HOMO→LUMO               | 0.20         | ππ*        |

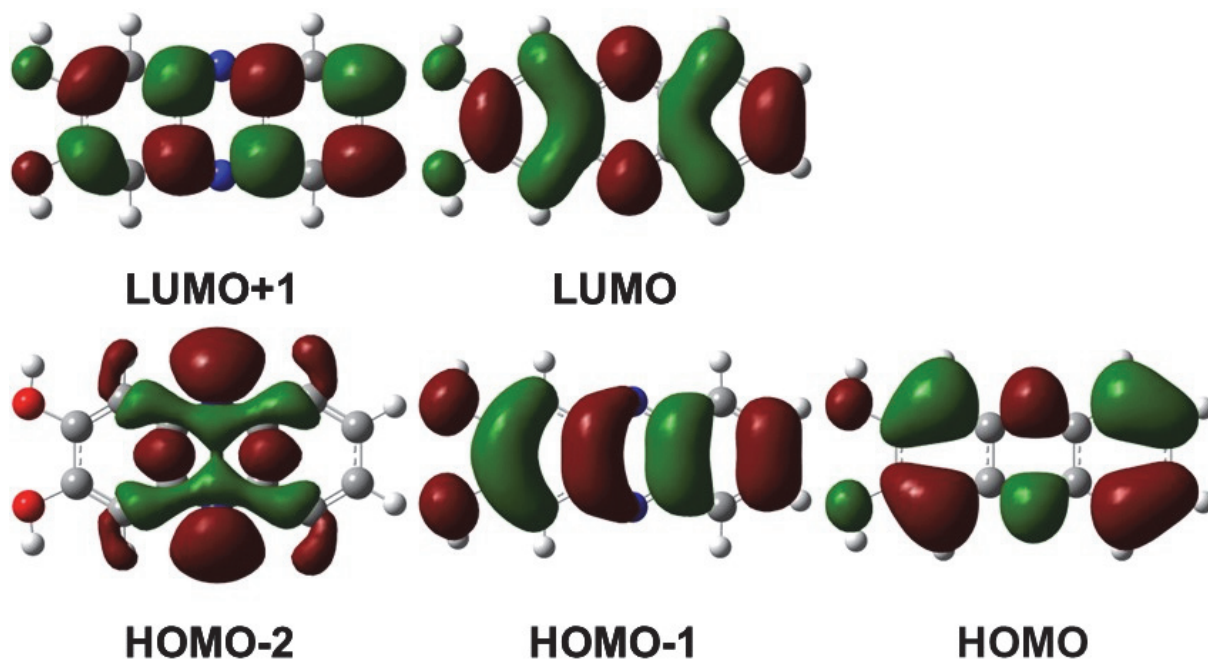

**Fig. S15** Plots of visualized orbitals based on the optimized geometry of *anti*-PD1-E derived from DFT calculations at B3LYP/6-311G(d,p) level.

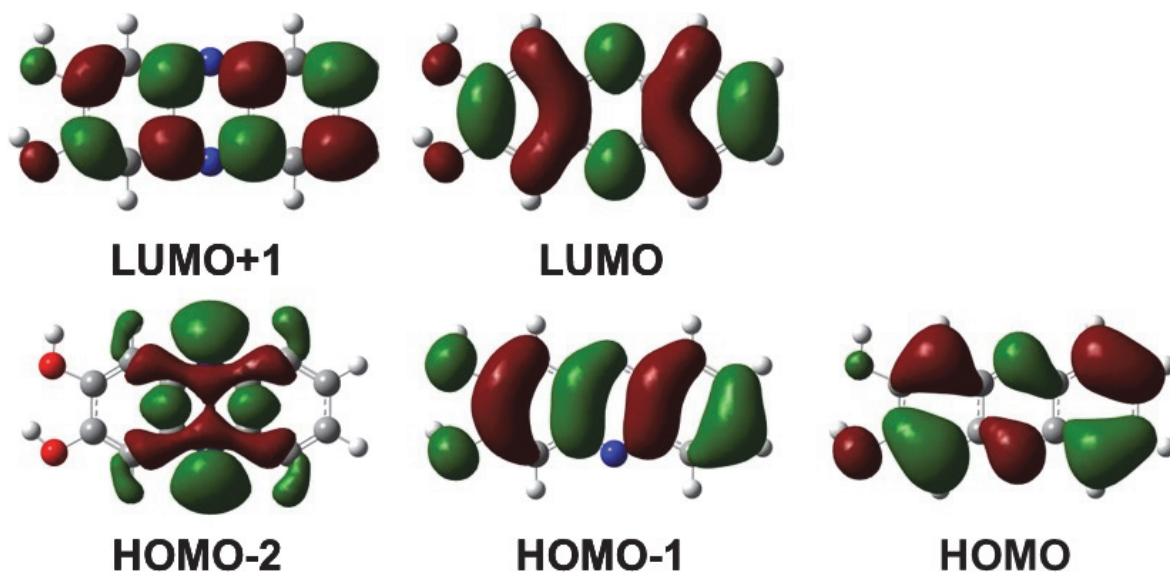

**Fig. S16** Plots of visualized orbitals based on the optimized geometry of *syn*-PD1-E derived from DFT calculations at B3LYP/6-311G(d,p) level.

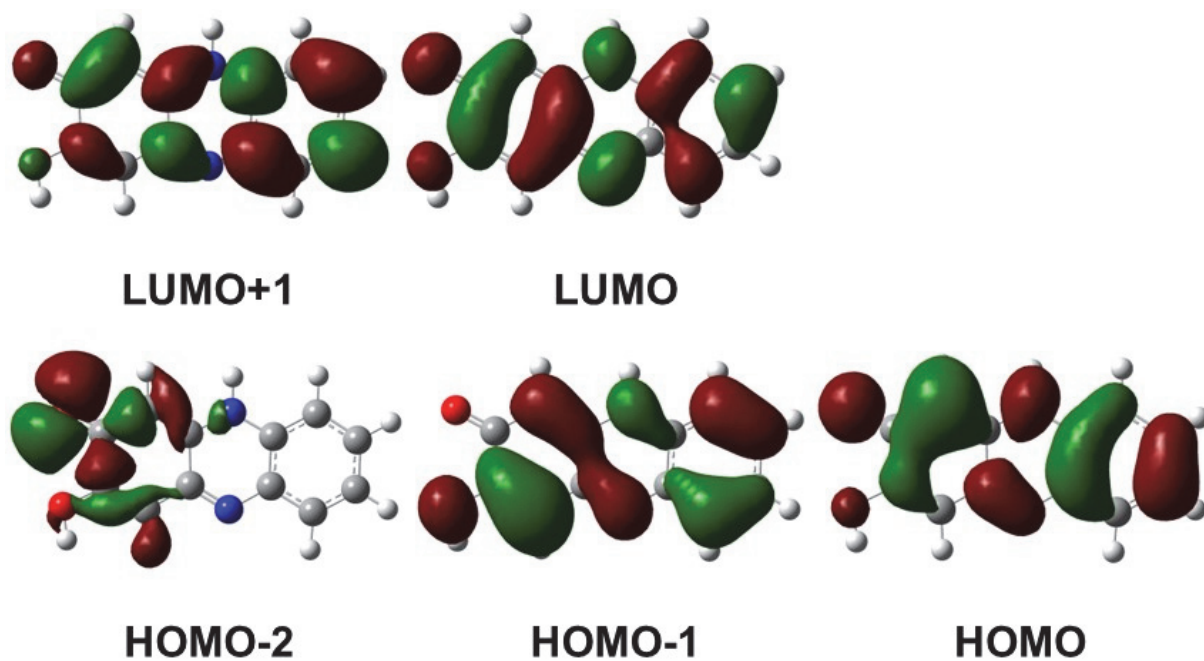

**Fig. S17** Plots of visualized orbitals based on the optimized geometry of *anti*-PD1-K derived from DFT calculations at B3LYP/6-311G(d,p) level.

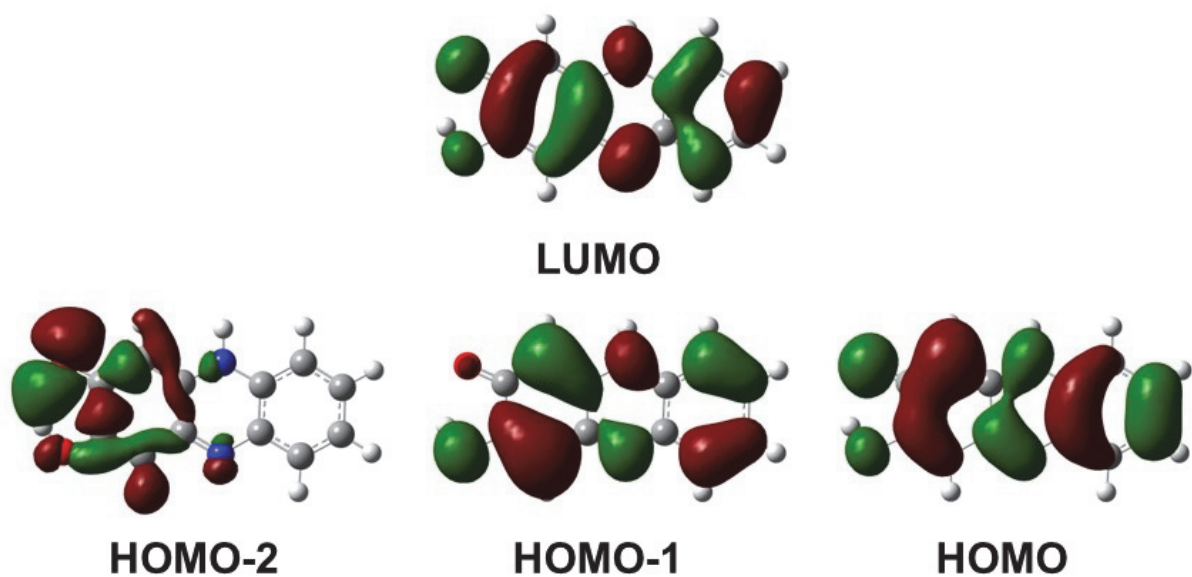

**Fig. S18** Plots of visualized orbitals based on the optimized geometry of *syn*-PD1-K derived from DFT calculations at B3LYP/6-311G(d,p) level.

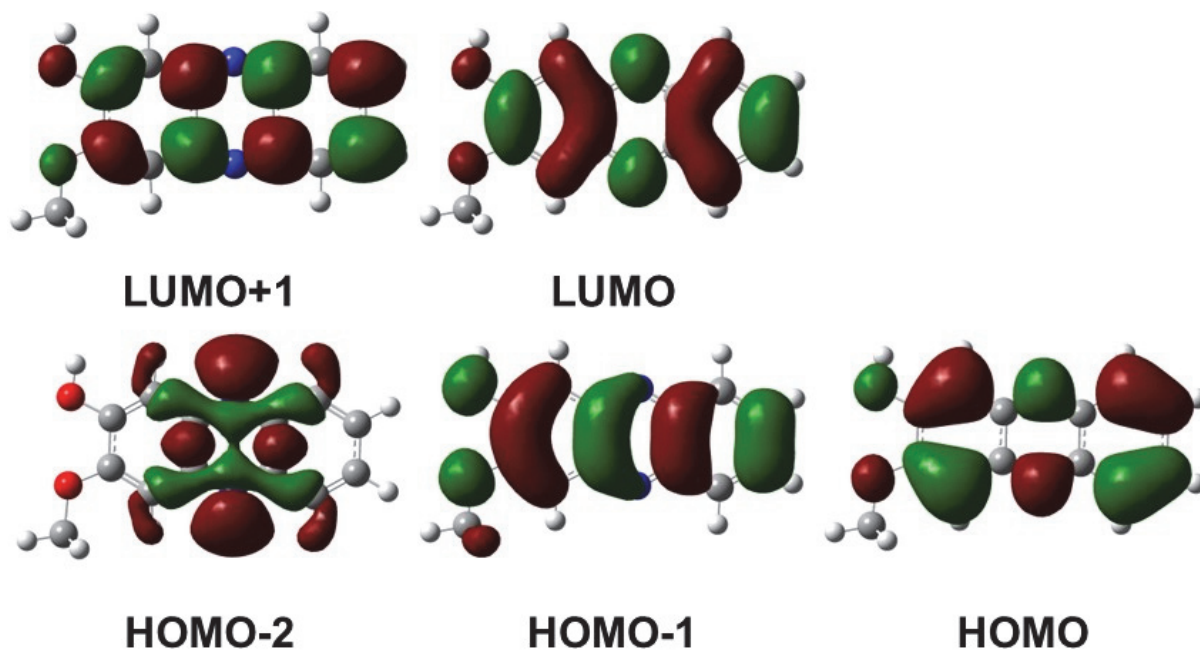

**Fig. S19** Plots of visualized orbitals based on the optimized geometry of *anti*-PD2-E derived from DFT calculations at B3LYP/6-311G(d,p) level.

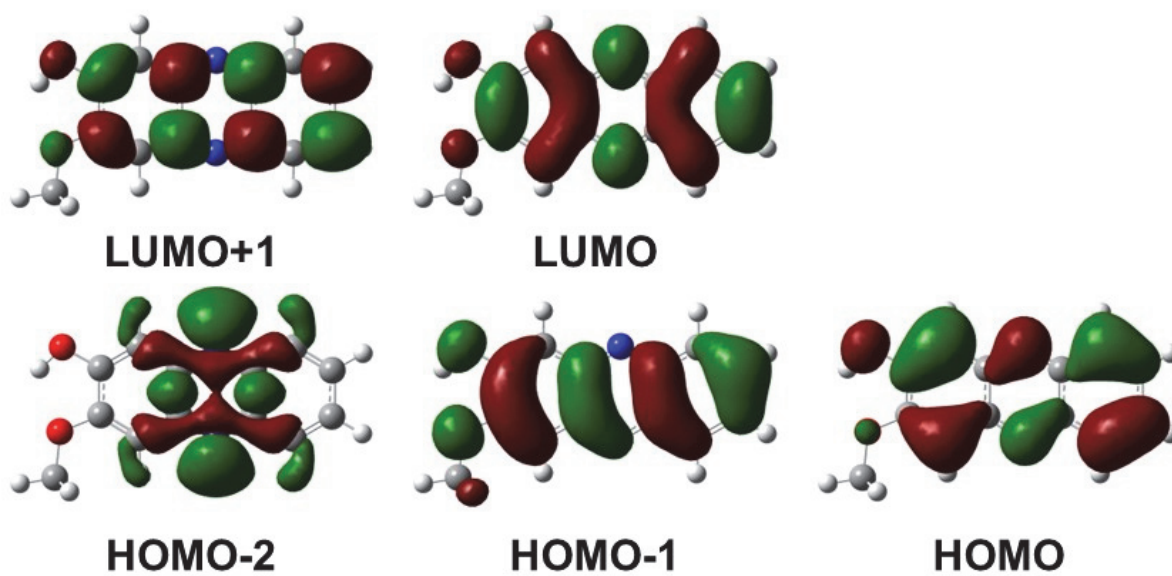

**Fig. S20** Plots of visualized orbitals based on the optimized geometry of *syn*-PD2-E derived from DFT calculations at B3LYP/6-311G(d,p) level.

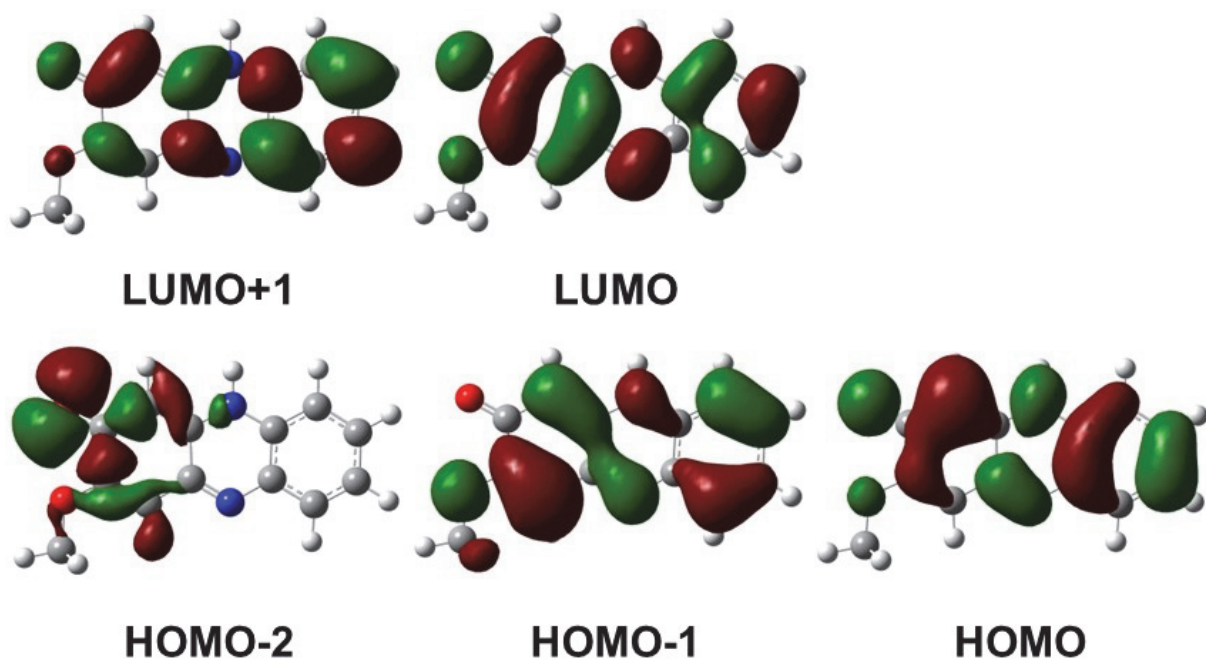

**Fig. S21** Plots of visualized orbitals based on the optimized geometry of **PD2-K** derived from DFT calculations at B3LYP/6-311G(d,p) level.

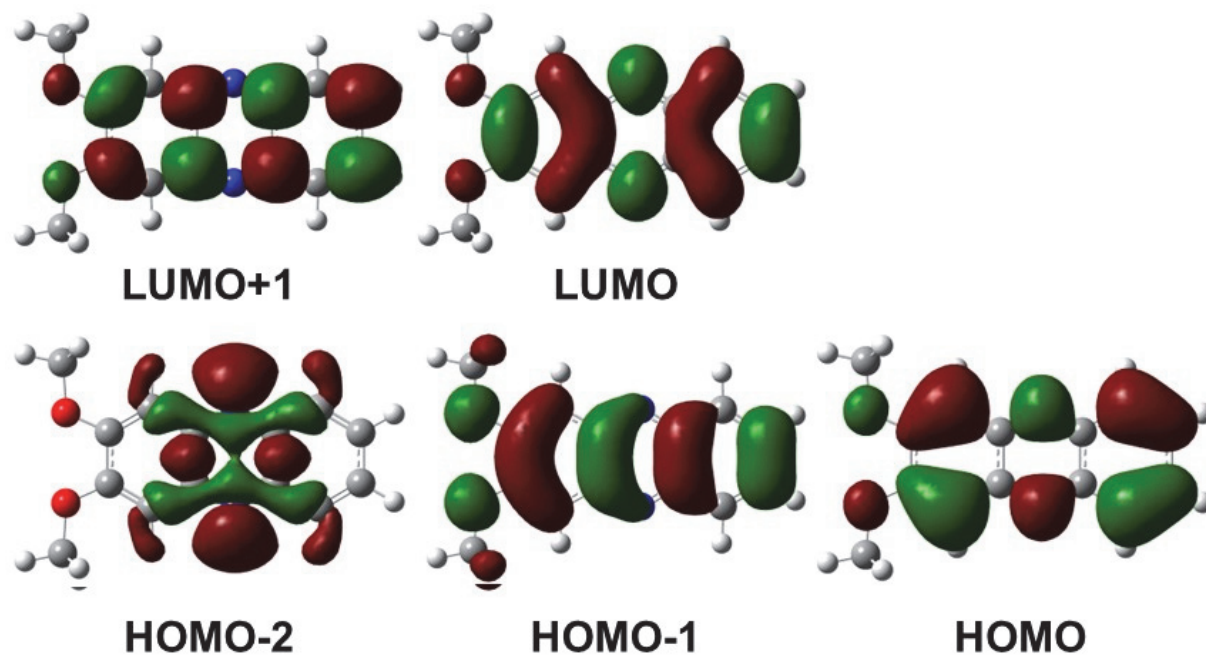

**Fig. S22** Plots of visualized orbitals based on the optimized geometry of **PD3** derived from DFT calculations at B3LYP/6-311G(d,p) level.



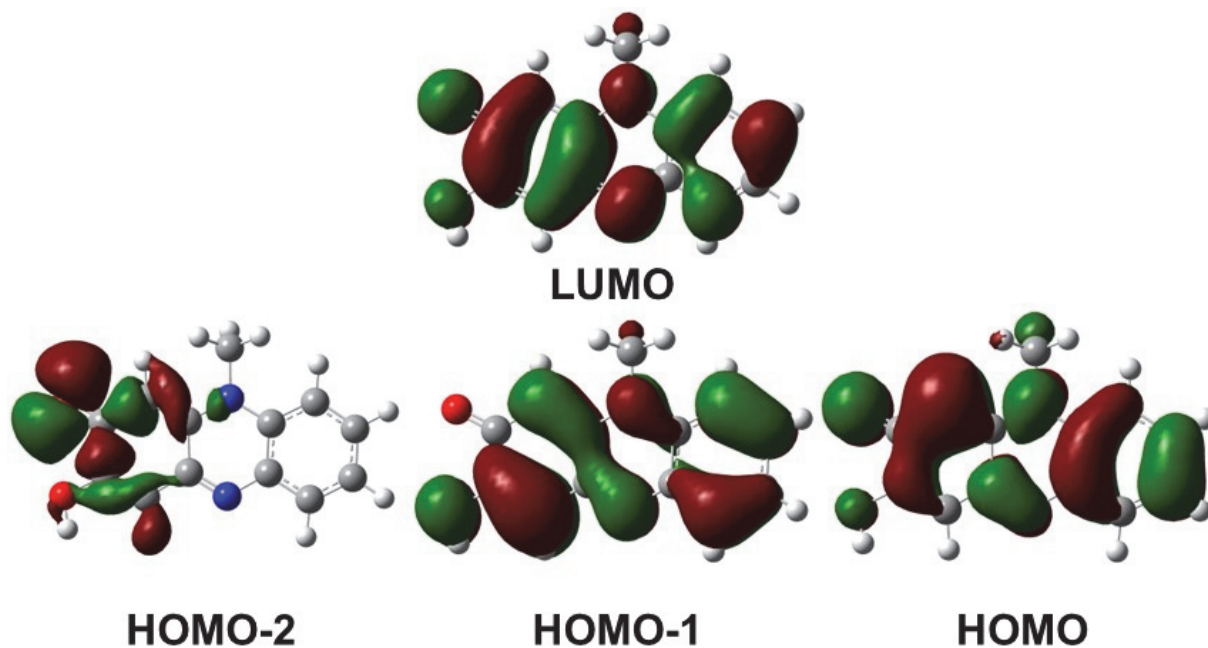

**Fig. S23** Plots of visualized orbitals based on the optimized geometry of *anti*-PZ1 derived from DFT calculations at B3LYP/6-311G(d,p) level.

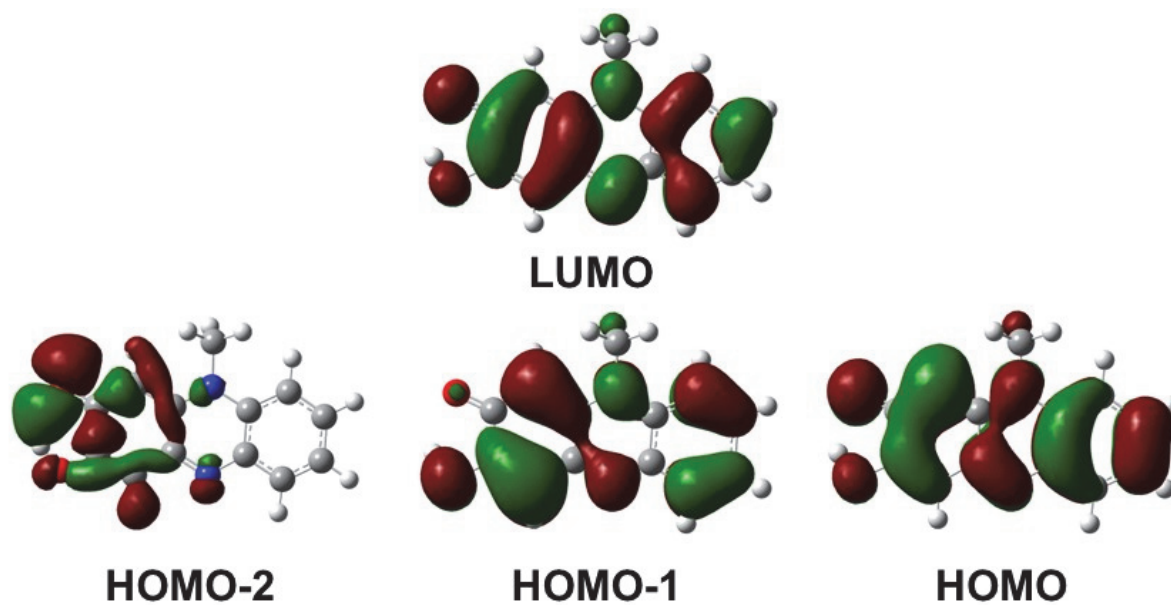

**Fig. S24** Plots of visualized orbitals based on the optimized geometry of *syn*-PZ1 derived from DFT calculations at B3LYP/6-311G(d,p) level.

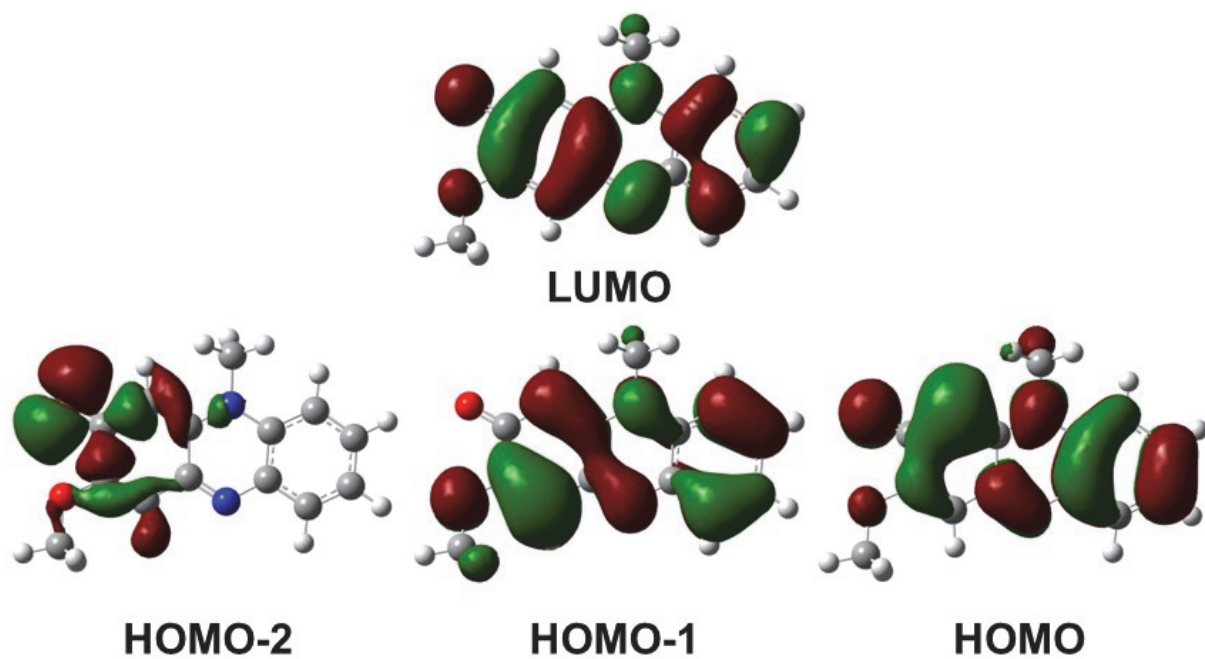

**Fig. S25** Plots of visualized orbitals based on the optimized geometry of **PZ2** derived from DFT calculations at B3LYP/6-311G(d,p) level.

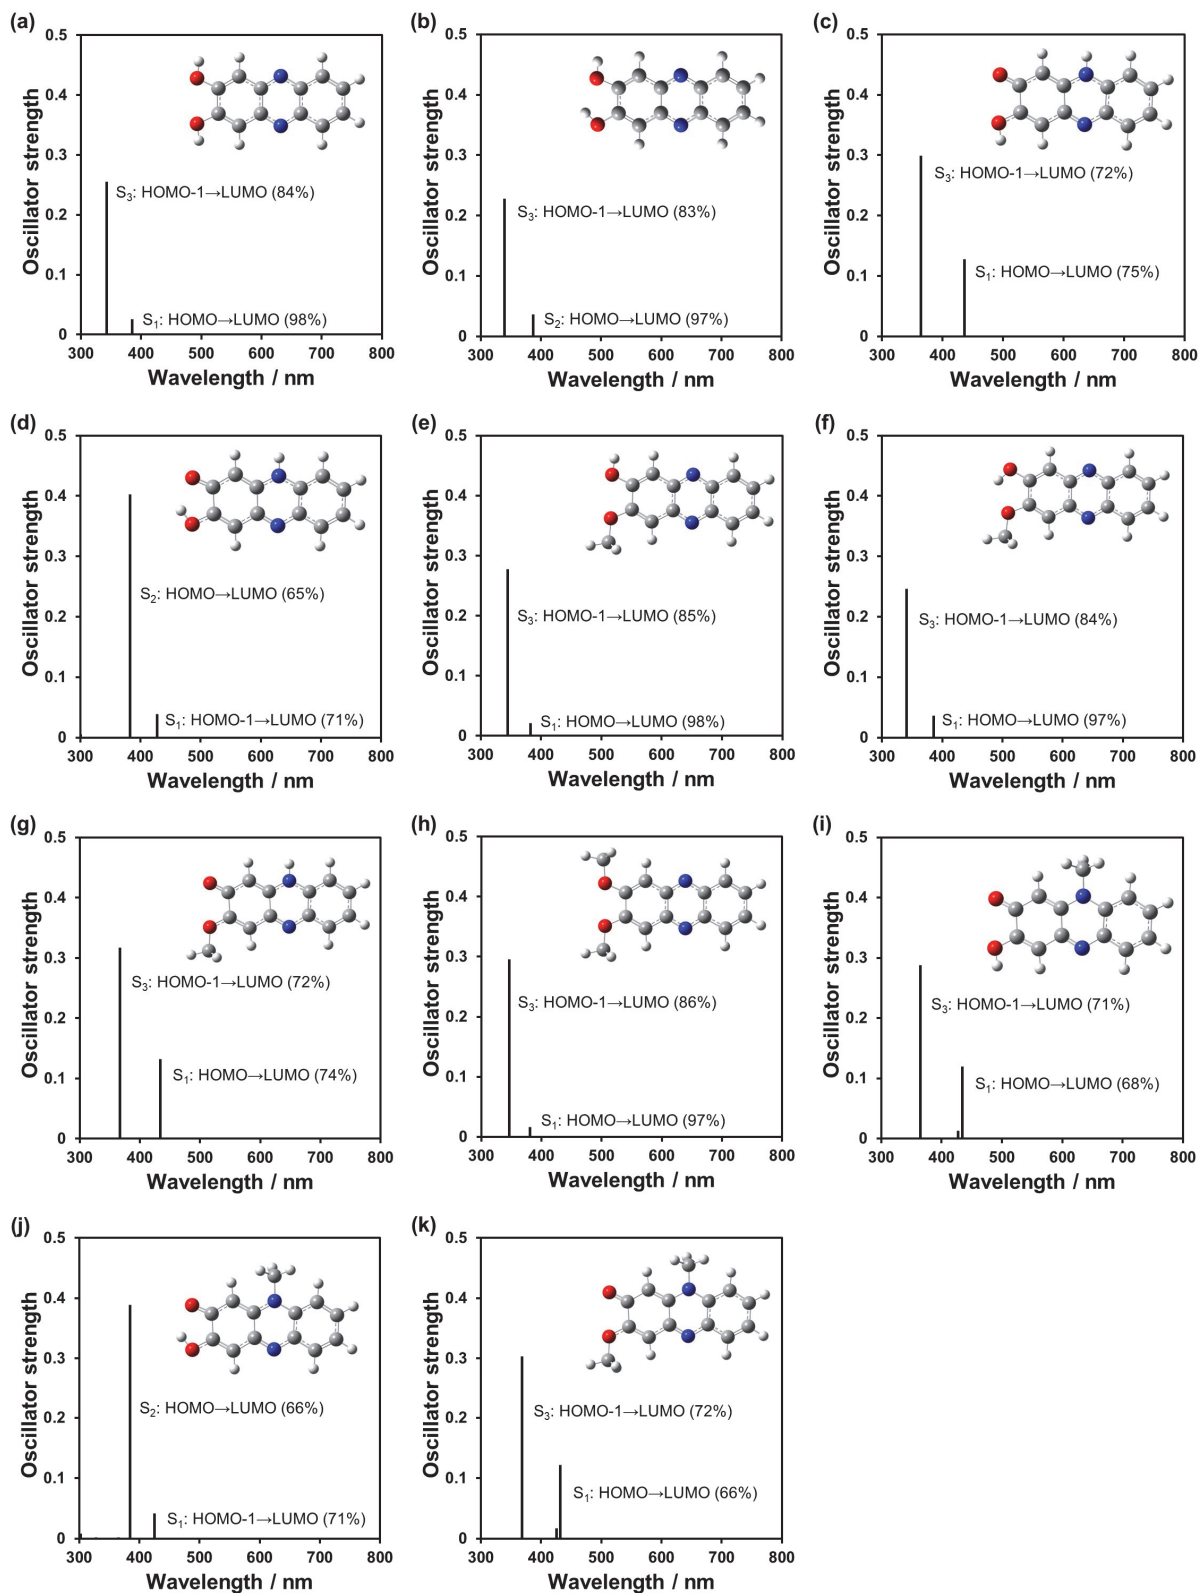

**Fig. S26** Calculated photoabsorption spectra of (a) *anti*-PD1-E, (b) *syn*-PD1-E, (c) *anti*-PD1-K, (d) *syn*-PD1-K, (e) *anti*-PD2-E, (f) *syn*-PD2-E, (g) PD2-K, (h) PD3, (i) *anti*-PZ1, (j) *syn*-PZ1, and (k) PZ2 at B3LYP/6-311G(d,p) level.

## 6. Photoabsorption and fluorescence measurements

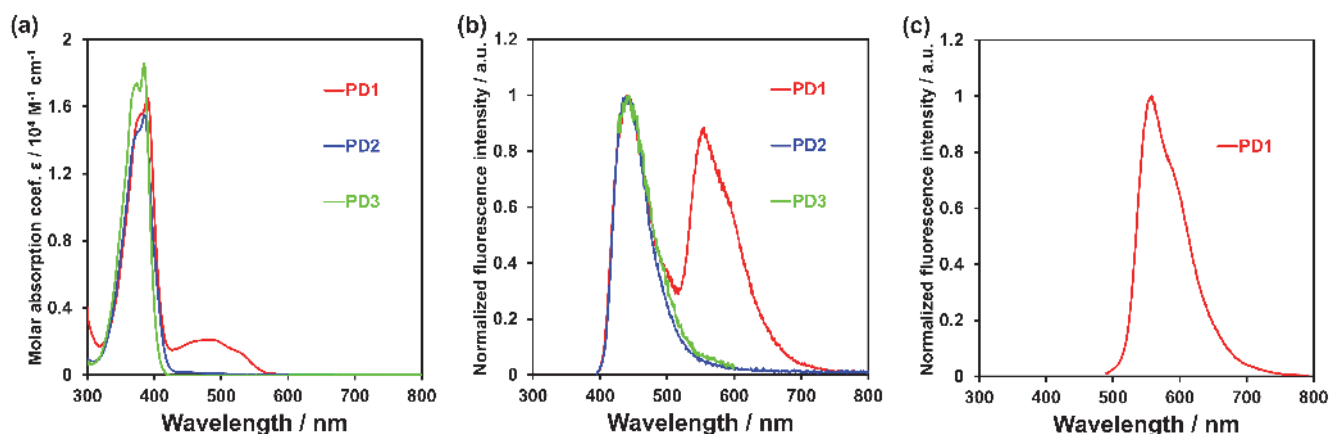

**Fig. S27** (a) Photoabsorption and (b and c) normalized fluorescence (b:  $\lambda_{\text{ex}} = 385-390 \text{ nm}$ , c:  $\lambda_{\text{ex}} = 480 \text{ nm}$ ) spectra of **PD1-3** ( $1.0 \times 10^{-4} \text{ M}$ ) in THF.

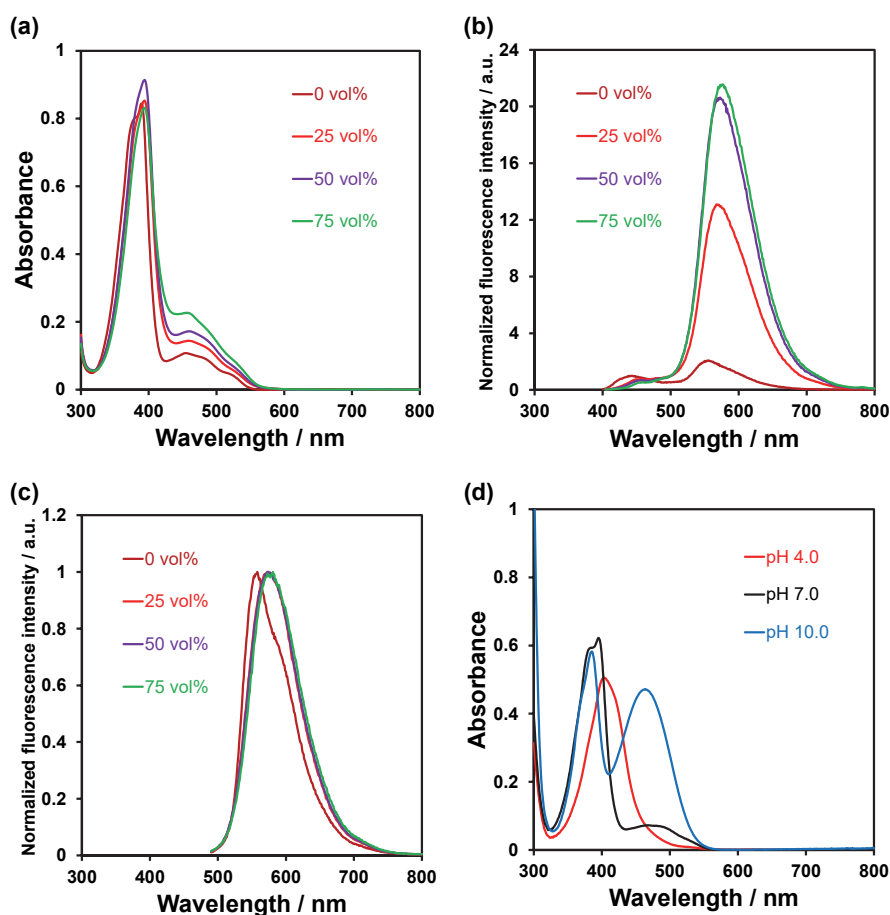

**Fig. S28** (a) Photoabsorption spectra of **PD1** ( $5.0 \times 10^{-5} \text{ M}$ ) in THF containing water (0-75 vol%). Normalized fluorescence (b:  $\lambda_{\text{ex}} = 390-394 \text{ nm}$ , c:  $\lambda_{\text{ex}} = 480 \text{ nm}$ ) spectra of **PD1** ( $5.0 \times 10^{-5} \text{ M}$ ) in THF containing water (0-75 vol%). (d) Photoabsorption spectra of **PD1** ( $5.0 \times 10^{-5} \text{ M}$ ) in DMSO before (under pH 7) and after (pH 4 and pH 10, respectively) addition of HCl aq. and NaOH aq.

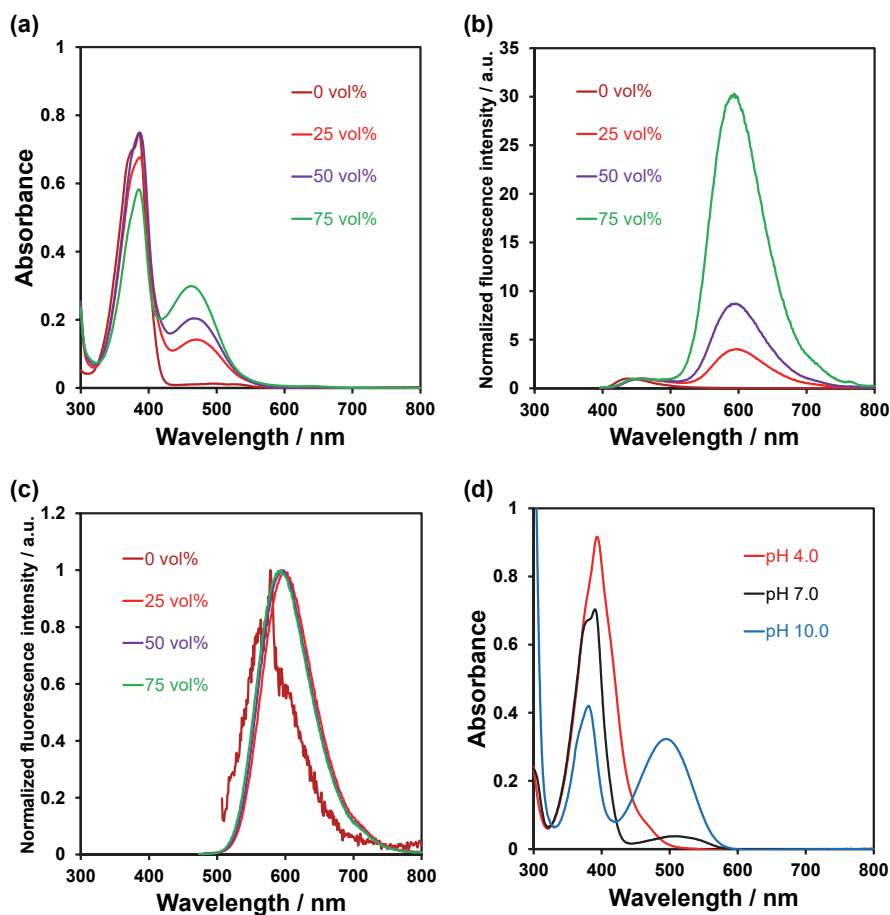

**Fig. S29** (a) Photoabsorption and (b and c) normalized fluorescence (b:  $\lambda_{\text{ex}} = 386\text{--}387$  nm, c:  $\lambda_{\text{ex}} = 463\text{--}497$  nm) spectra of **PD2** ( $5.0 \times 10^{-5}$  M) in THF containing water (0–75 vol%). (d) Photoabsorption spectra of **PD2** ( $5.0 \times 10^{-5}$  M) in DMSO before (under pH 7) and after (pH 4 and pH 10, respectively) addition of HCl aq. and NaOH aq.

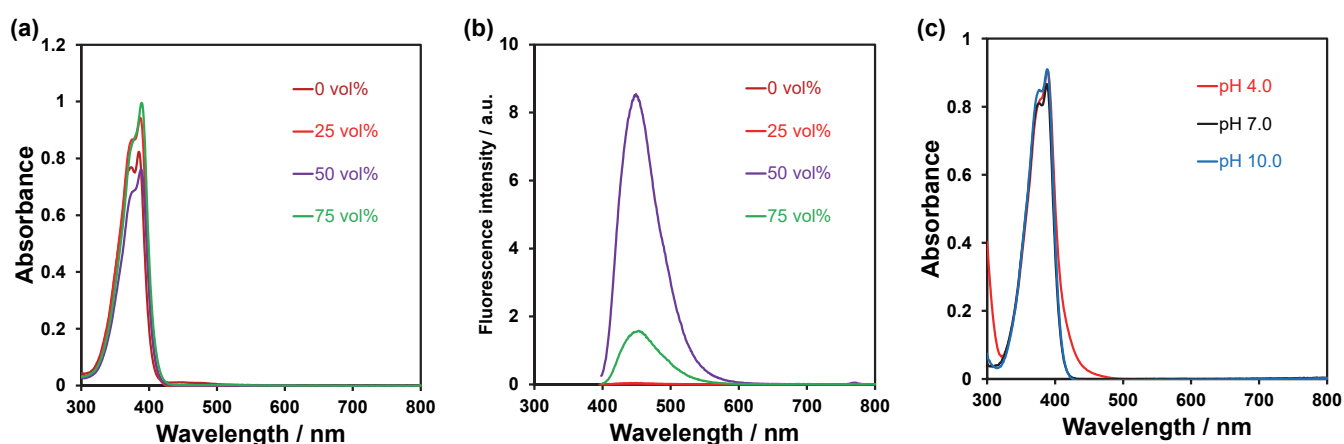

**Fig. S30** (a) Photoabsorption and (b) normalized fluorescence ( $\lambda_{\text{ex}} = 385\text{--}389$  nm) spectra of **PD3** ( $5.0 \times 10^{-5}$  M) in various solvents in THF containing water (0–75 vol%). (c) Photoabsorption spectra of **PD3** ( $5.0 \times 10^{-5}$  M) in DMSO before (under pH 7) and after (pH 4 and pH 10, respectively) addition of HCl aq. and NaOH aq.

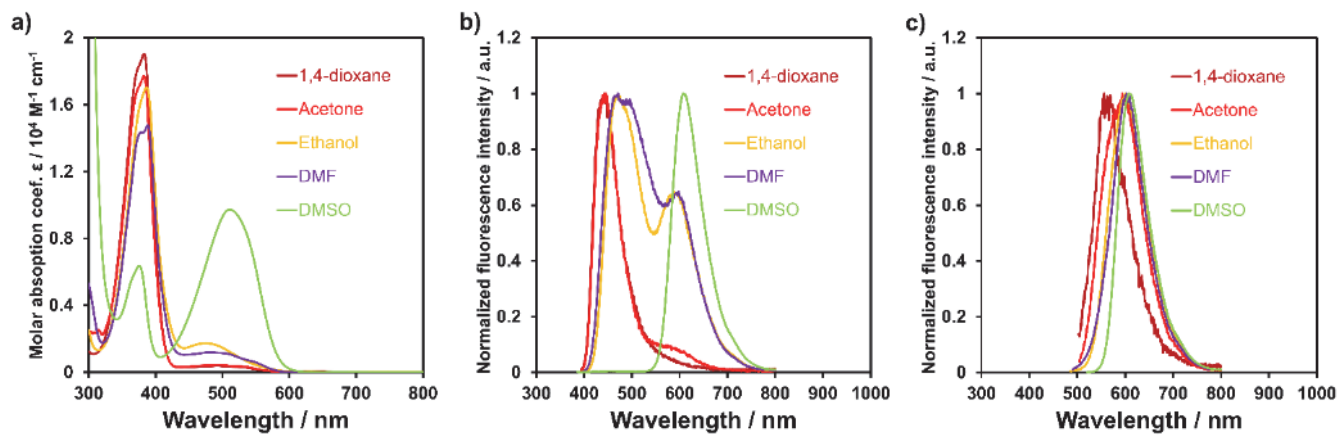

**Fig. S31** (a) Photoabsorption and (b and c) normalized fluorescence (b:  $\lambda_{\text{ex}} = 378\text{--}390$  nm, c:  $\lambda_{\text{ex}} = 480$  nm) spectra of **PD2** ( $1.0 \times 10^{-4}$  M) in various solvents.

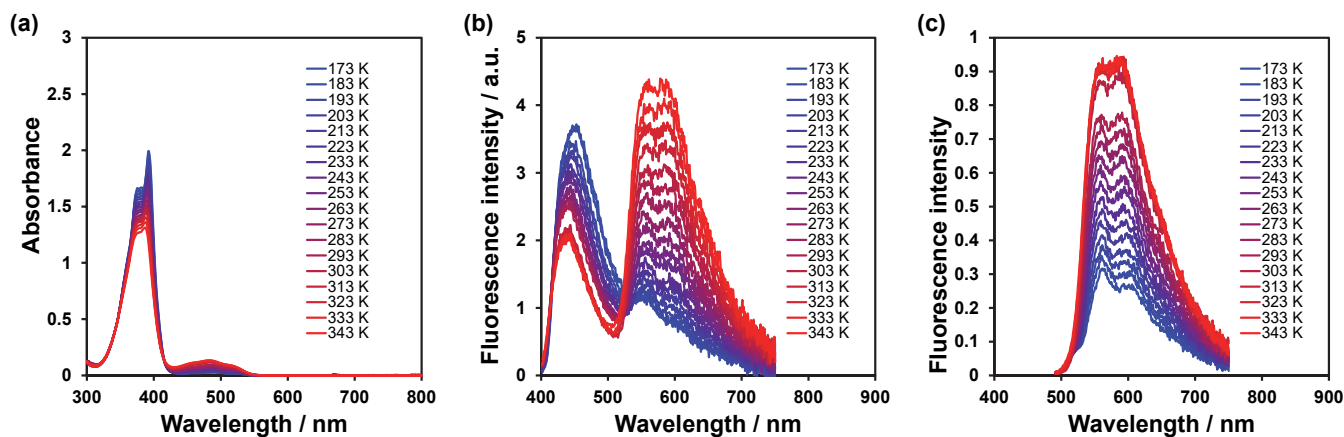

**Fig. S32** Temperature-dependent (a) Photoabsorption and (b and c) fluorescence (b:  $\lambda_{\text{ex}} = 392$  nm, c:  $\lambda_{\text{ex}} = 481$  nm) spectra of **PD1** ( $1.0 \times 10^{-4}$  M) from 173 K to 343 K.

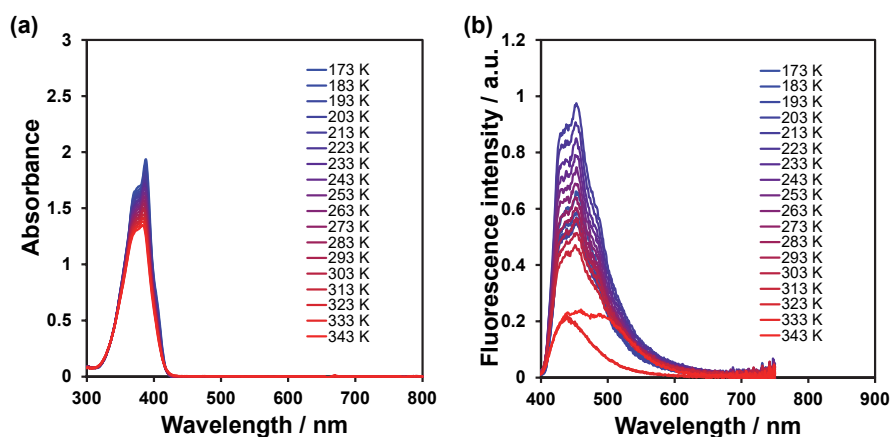

**Fig. S33** Temperature-dependent (a) Photoabsorption and (b) fluorescence ( $\lambda_{\text{ex}} = 388$  nm) spectra of **PD2** ( $1.0 \times 10^{-4}$  M) from 173 K to 343 K.

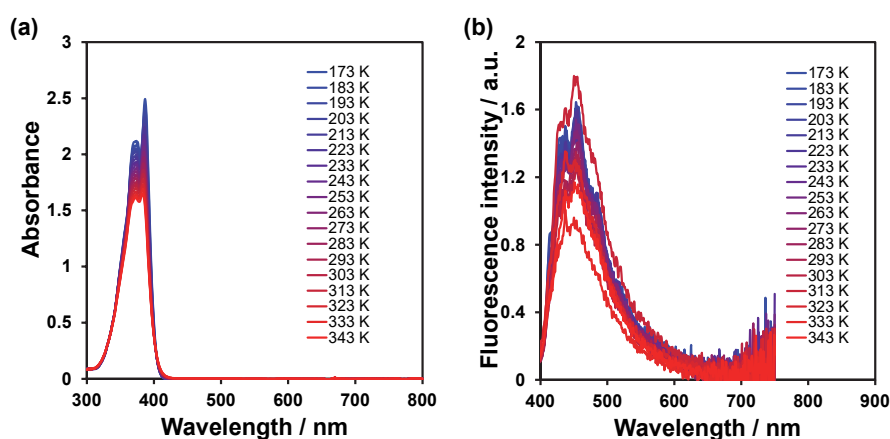

**Fig. S34** Temperature-dependent (a) Photoabsorption and (b) fluorescence ( $\lambda_{\text{ex}} = 387$  nm) spectra of **PD3** ( $1.0 \times 10^{-4}$  M) from 173 K to 343 K.

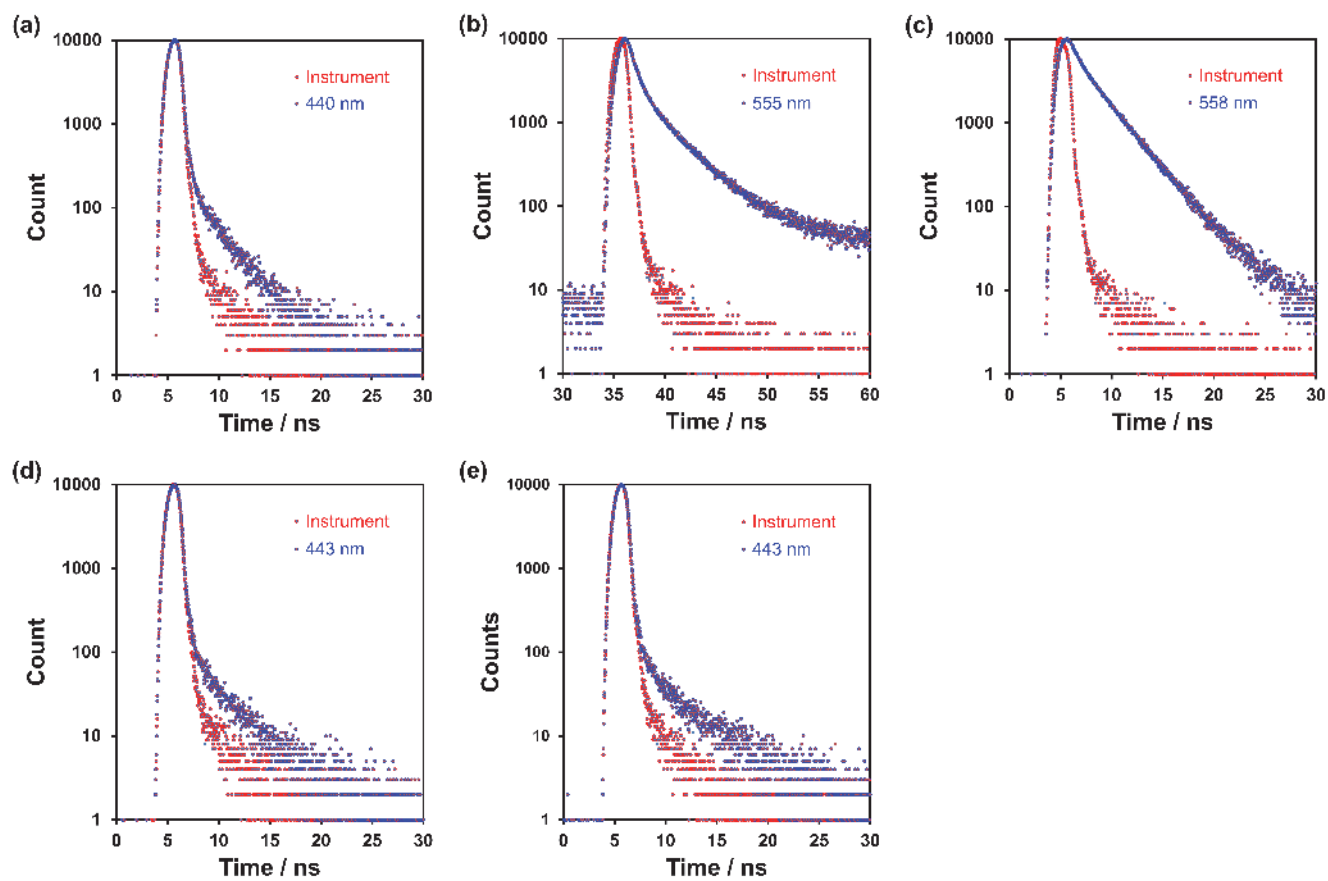

**Fig. S35** Instrument profiles (red dots) and fluorescence decay profiles (blue dots) of (a, b and c) **PD1** (a:  $\lambda_{\text{exc}} = 366$  nm, b:  $\lambda_{\text{exc}} = 366$  nm, c:  $\lambda_{\text{exc}} = 451$  nm), (d) **PD2** ( $\lambda_{\text{exc}} = 366$  nm), and (e) **PD3** ( $\lambda_{\text{exc}} = 366$  nm).



## 7. Photo-induced proton tautomerism

The photoabsorption and fluorescence spectral measurements of **PD1–3**, **PZ1**, and **PZ2** were performed in 2-methyltetrahydrofuran (2-MeTHF) at room temperature (298 K) and a glassy matrix of 2-MeTHF at 77 K.<sup>S3</sup> A 1.0 cm quartz cuvette was used in measurements at 298 K and a 0.4 cm quartz tube at 77 K. The solutions were irradiated with light-emitting diode (LED) light with a peak wavelength of 385 nm for 4 minutes (22.3 mW cm<sup>-2</sup>, LDR2-100VL2-385-W, CCS). The photoabsorption and fluorescence spectra of these solutions were measured immediately after photoirradiation.

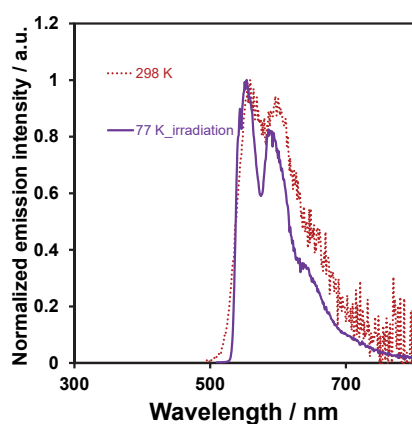

**Fig. S36** Normalized fluorescence ( $\lambda_{\text{ex}} = 485\text{--}500$  nm) spectra of **PD1** in 2-MeTHF at 298 (dashed line) and 77 K (solid lines) after irradiation with monochromic light at 385 nm.

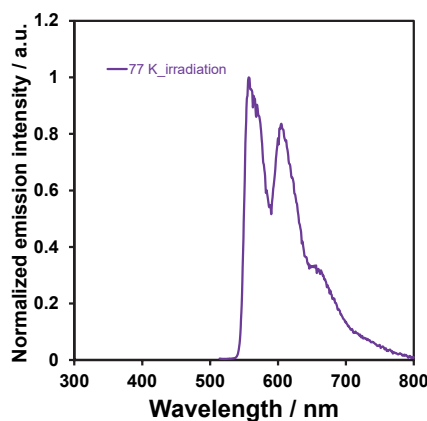

**Fig. S37** Normalized fluorescence ( $\lambda_{\text{ex}} = 504$  nm) spectra of **PD2** in 2-MeTHF at 77 K after irradiation with monochromic light at 385 nm.

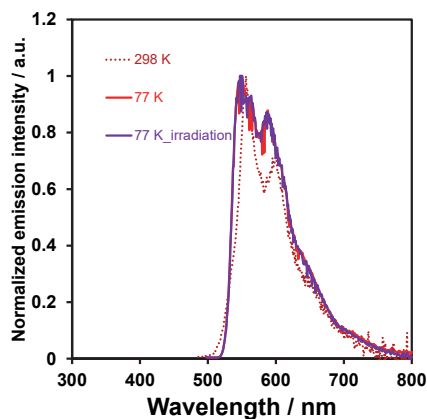

**Fig. S38** Normalized fluorescence ( $\lambda_{\text{ex}} = 476\text{--}487$  nm) spectra of **PZ1** in 2-MeTHF at 298 (dashed line) and 77 K (solid lines) before and after irradiation with monochromatic light at 385 nm.

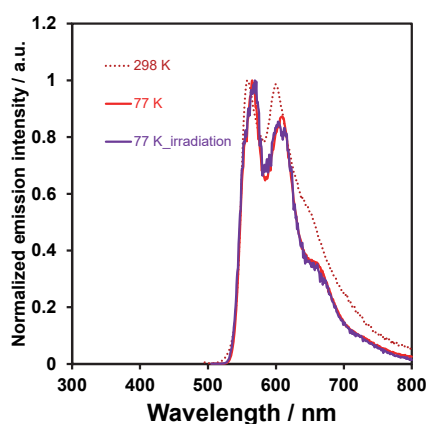

**Fig. S39** Normalized fluorescence ( $\lambda_{\text{ex}} = 485\text{--}495$  nm) spectra of **PZ2** in 2-MeTHF at 298 (dashed line) and 77 K (solid lines) before and after irradiation with monochromatic light at 385 nm.

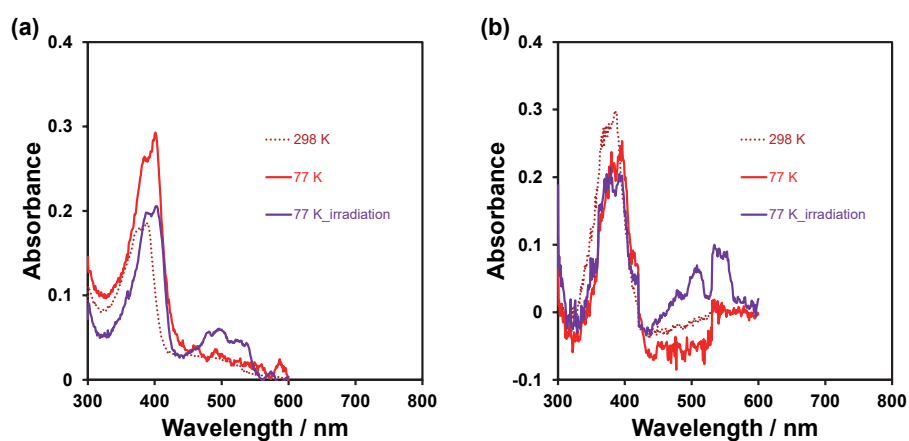

**Fig. S40** Photoabsorption spectra of (a) **PD1** and (b) **PD2** in 2-MeTHF (10  $\mu\text{M}$ ) at 298 K (dashed line) and 77 K (solid line) before and after irradiation with monochromatic light at 385 nm.

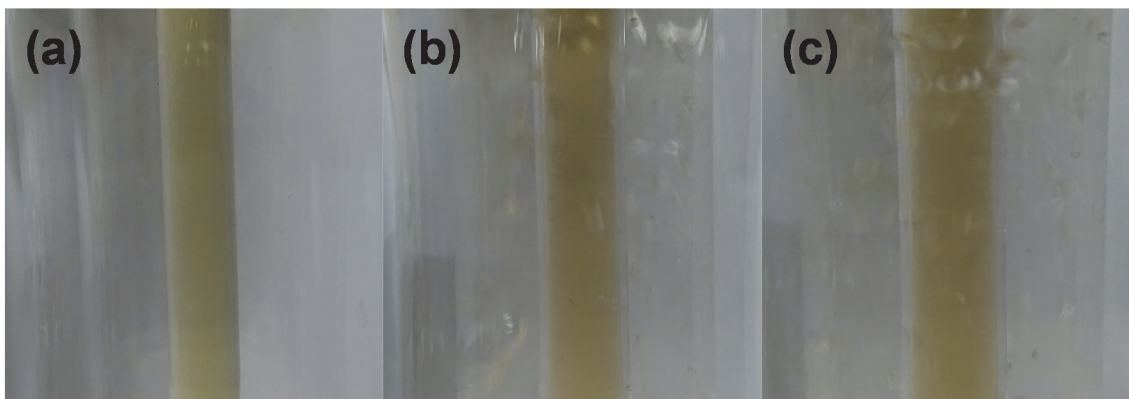

**Fig. S41** Photographs of **PZ1** in 2-MeTHF (a: 298 K, b: 77 K, and c: 77 K after photoirradiation at 385 nm).

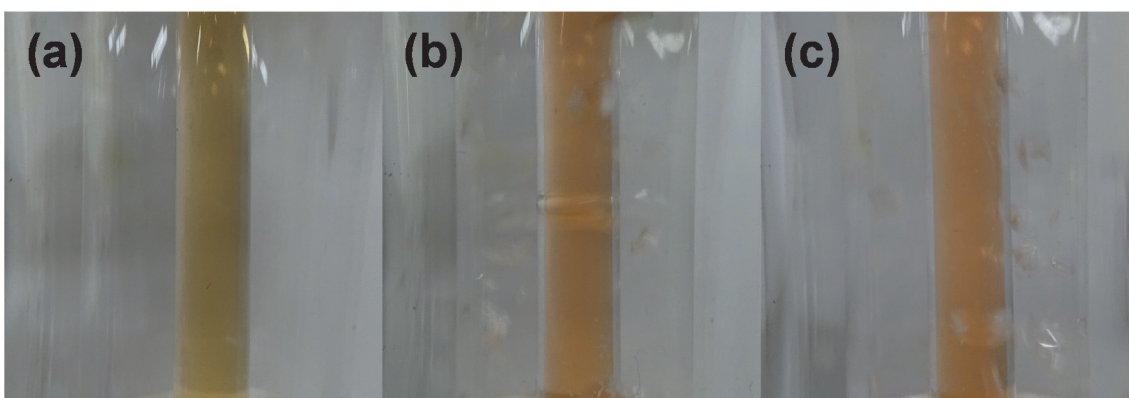

**Fig. S42** Photographs of **PZ2** in 2-MeTHF (a: 298 K, b: 77 K, and c: 77 K after photoirradiation at 385 nm).

## 8. Phosphorescence measurements

In order to assign the emission bands of **PD3** that appeared in the range of 600-800 nm in 2-MeTHF at 77K (Fig. 6f), phosphorescence measurements were performed for **PD1–3**, **PZ1**, and **PZ2**, with an initial delay of 100  $\mu$ s.

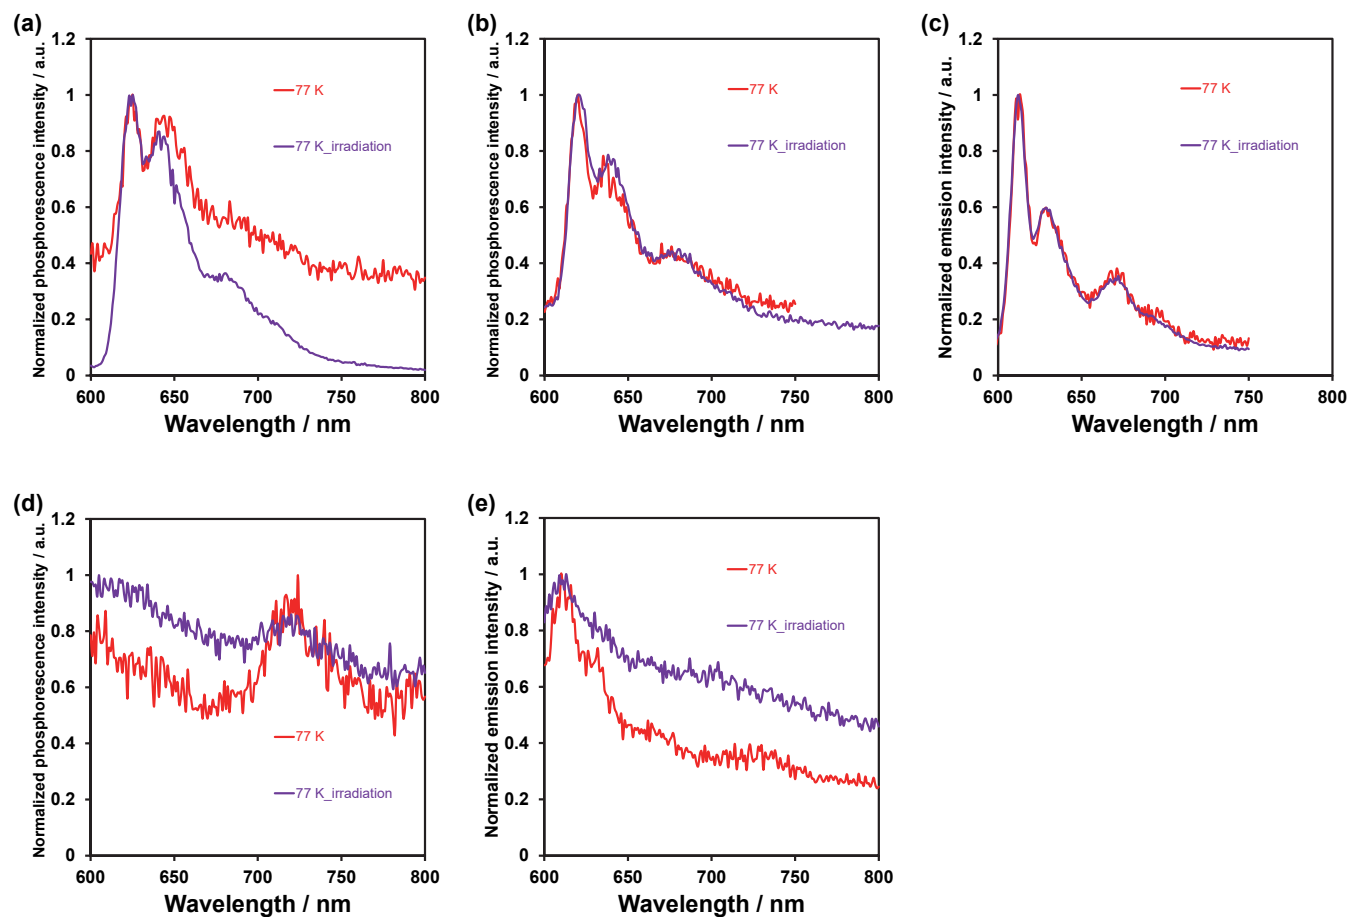

**Fig. S43** Phosphorescence spectra of (a) **PD1** ( $\lambda_{ex} = 400$  nm), (b) **PD2** ( $\lambda_{ex} = 395$  nm), (c) **PD3** ( $\lambda_{ex} = 385$  nm), (d) **PZ1** ( $\lambda_{ex} = 397$  nm), and (e) **PZ2** ( $\lambda_{ex} = 370$  nm) in 2-MeTHF at 77 K before and after irradiation with monochromatic light at 385 nm.

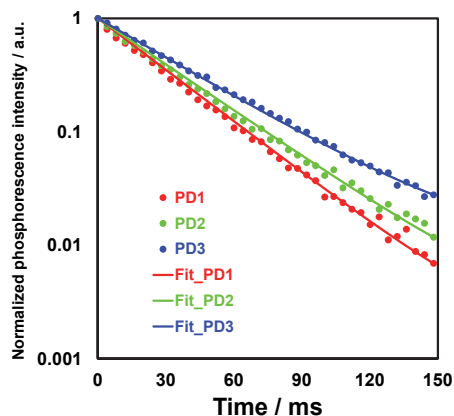

**Fig. S44** Phosphorescence lifetime decay curves of **PD1** at 623 nm, **PD2** at 621 nm, and **PD3** at 612 nm in 2-MeTHF at 77K. The phosphorescence lifetimes were determined to be 28.6 ms for **PD1**, 32.0 ms for **PD2**, and 37.3 ms for **PD3**.

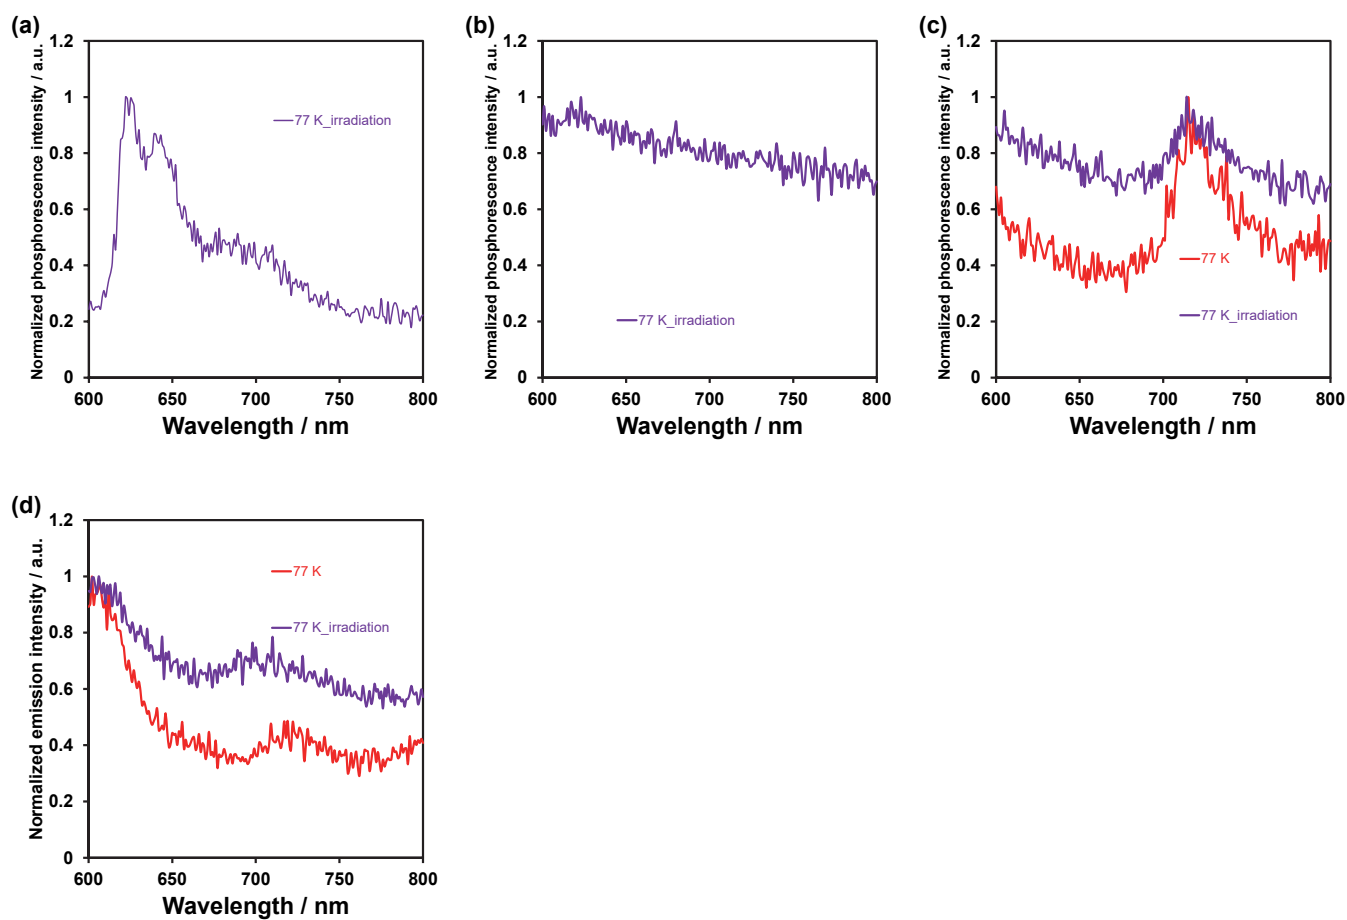

**Fig. S45** Phosphorescence spectra of (a) **PD1** ( $\lambda_{\text{ex}} = 500$  nm), (b) **PD2** ( $\lambda_{\text{ex}} = 504$  nm), (c) **PZ1** ( $\lambda_{\text{ex}} = 487$  nm), and (d) **PZ2** ( $\lambda_{\text{ex}} = 495$  nm) in 2-MeTHF at 77 K after irradiation with monochromatic light at 385 nm.

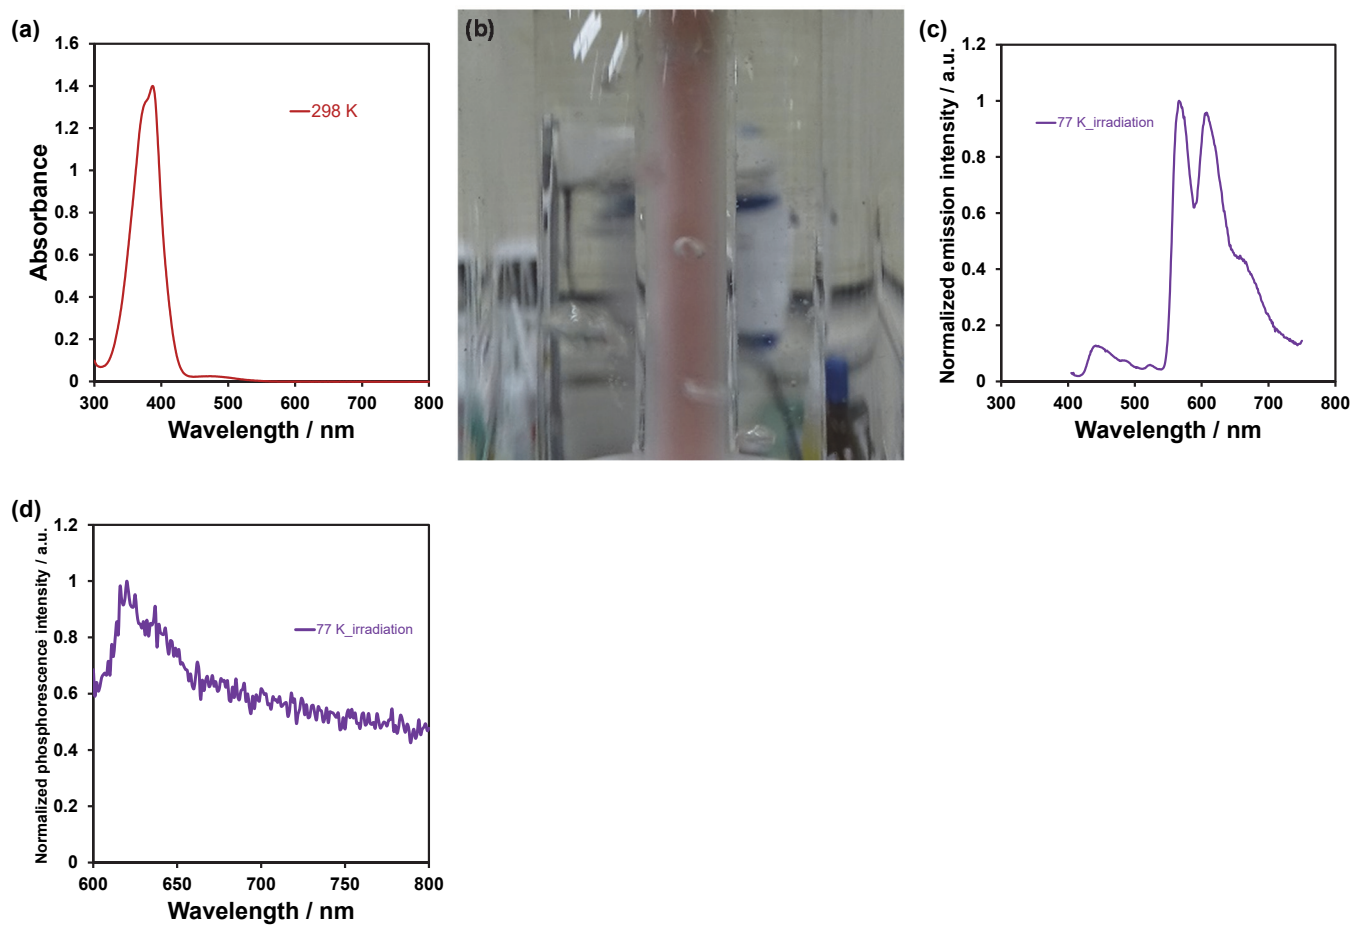

**Fig. S46** (a) Photoabsorption spectrum of **PD2** ( $1.0 \times 10^{-4}$  M) in 2-MeTHF containing water at 298 K, (b) photograph of **PD2**, (c) photoluminescence spectrum of **PD2** ( $\lambda_{\text{ex}} = 504$  nm), and (d) Phosphorescence spectra of **PD2** in 2-MeTHF containing water at 77 K after irradiation with monochromatic light at 385 nm.

## 9. Solid-state optical properties

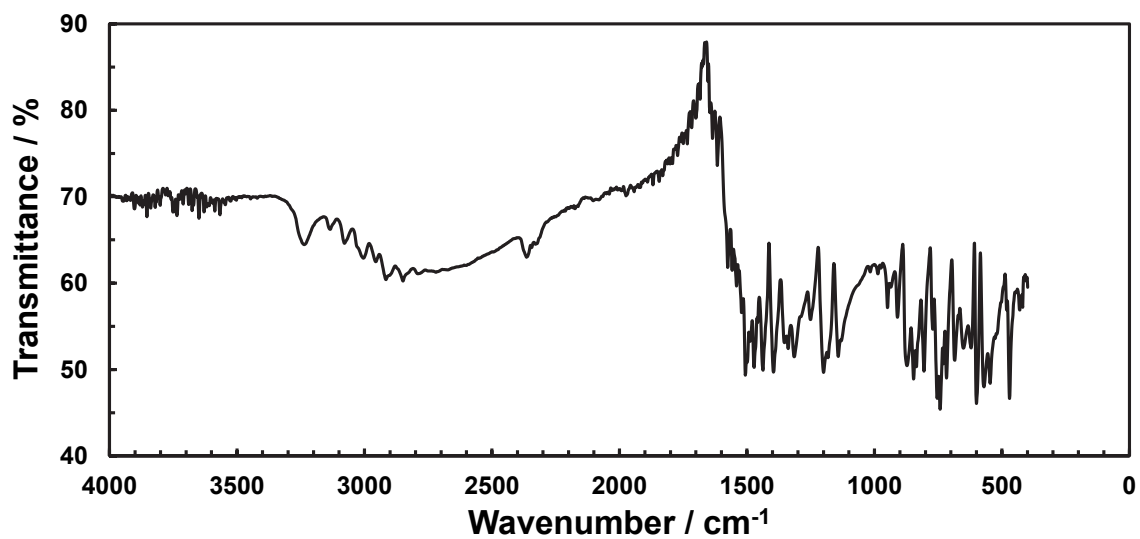

Fig. S47 ATR-FT-IR spectrum of **PD1** crystal obtained by sublimation.

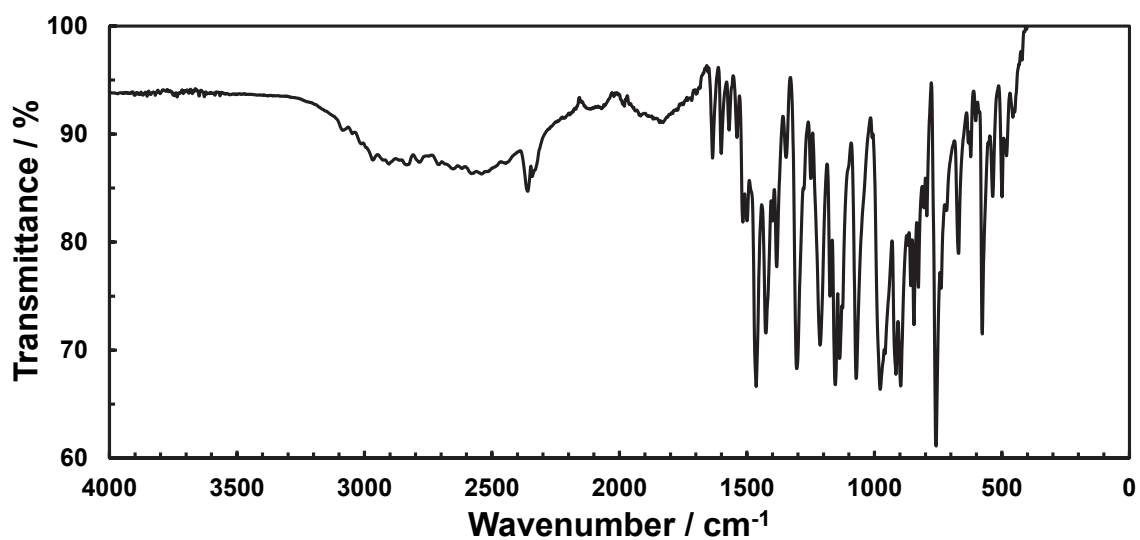

Fig. S48 ATR-FT-IR spectrum of **PD2** crystal obtained by recrystallization from an ethanol solvent.

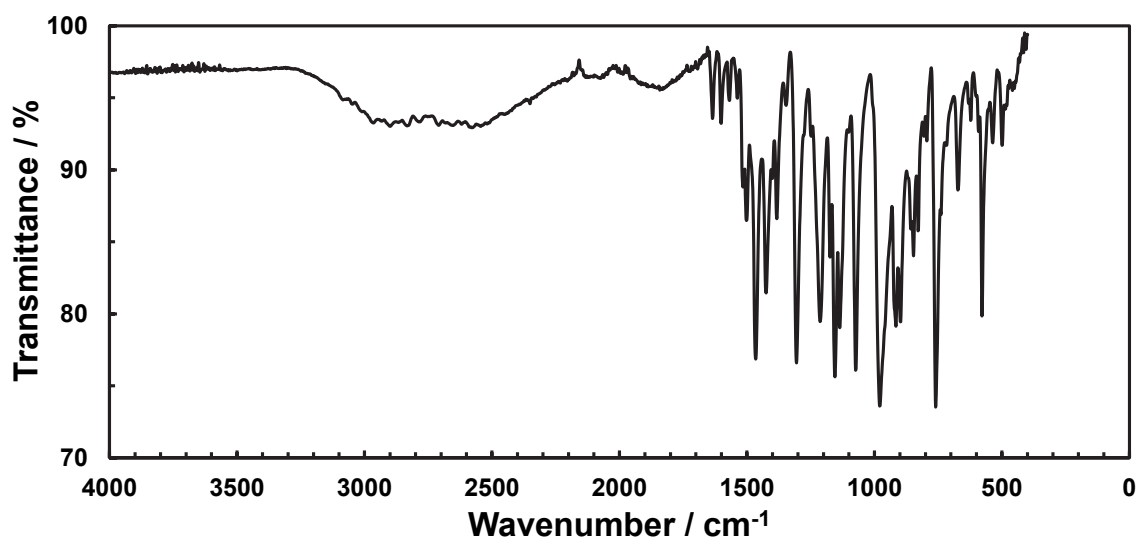

Fig. S49 ATR-FT-IR spectrum of **PD2** after heating at 133 °C under a pressure of  $6.7 \times 10^{-2}$  Pa.

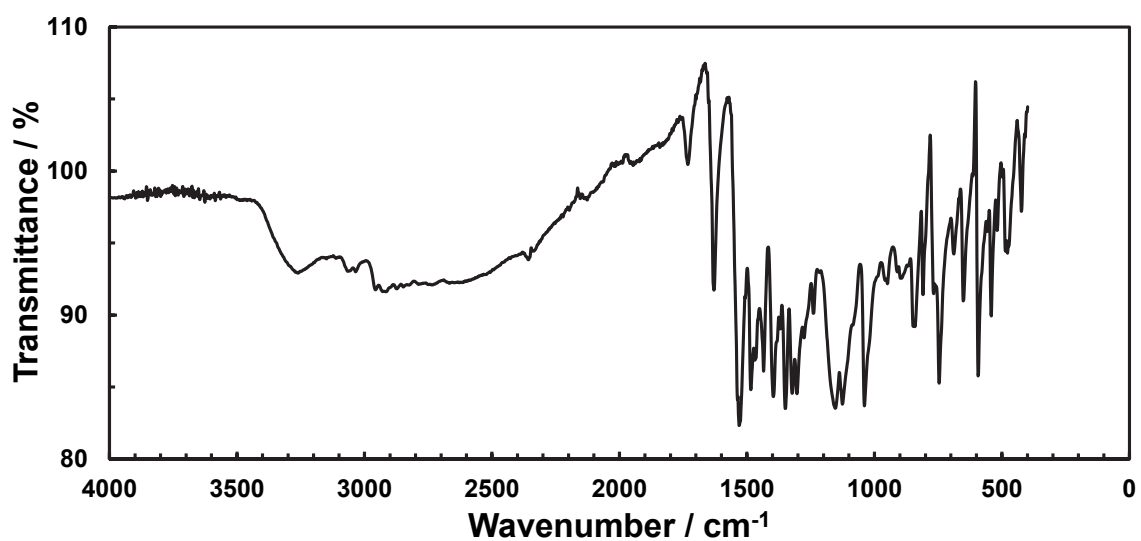

Fig. S50 ATR-FT-IR spectrum of **PD2** after heating at 205 °C under nitrogen atmosphere.



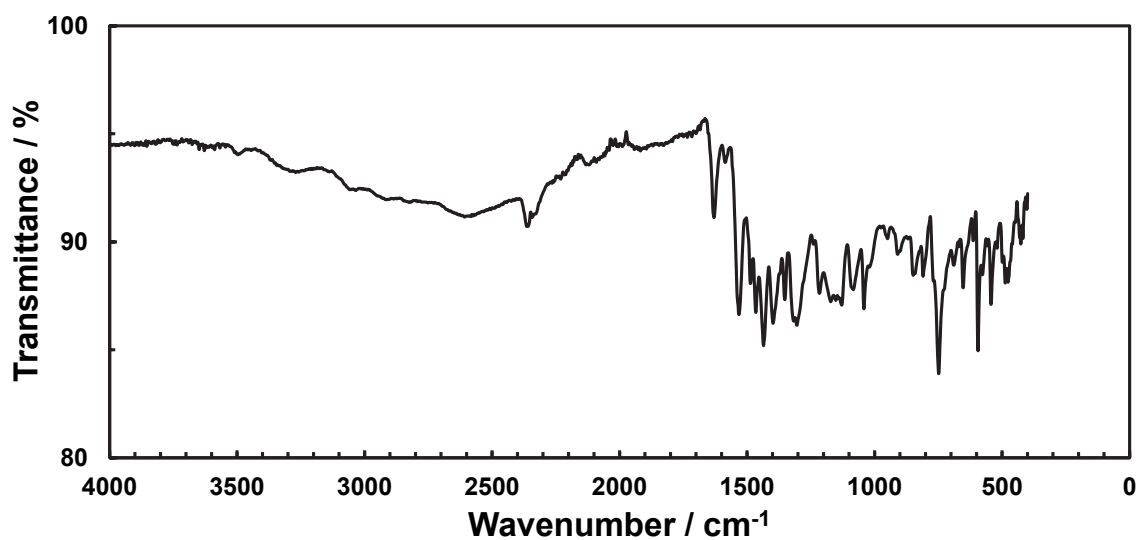

Fig. S51 ATR-FT-IR spectrum of **PD2** after heating at 270 °C under nitrogen atmosphere.

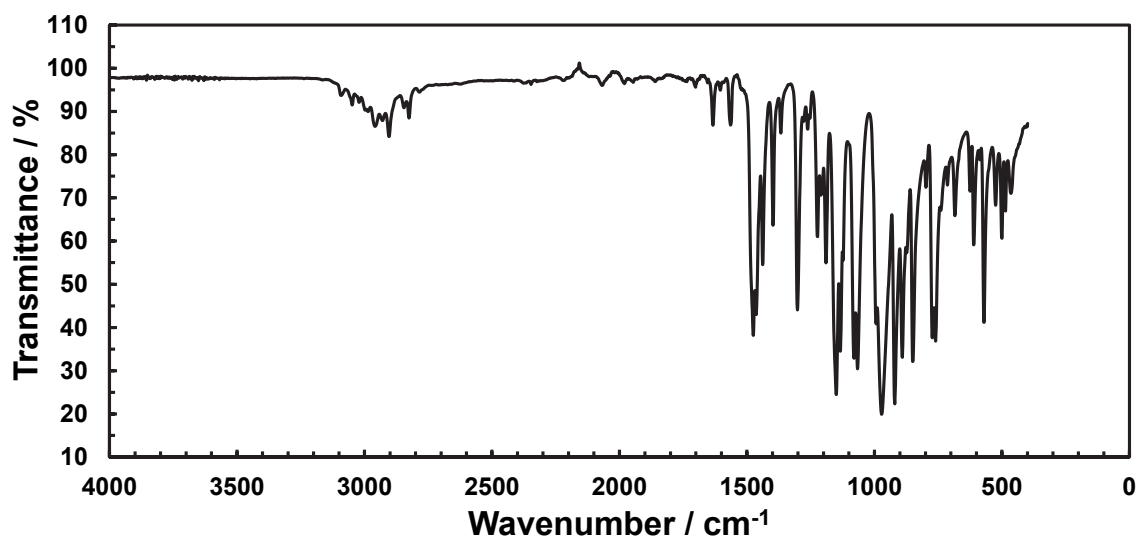

Fig. S52 ATR-FT-IR spectrum of **PD3** powder obtained by reprecipitation from a mixed solvent of THF/hexane.

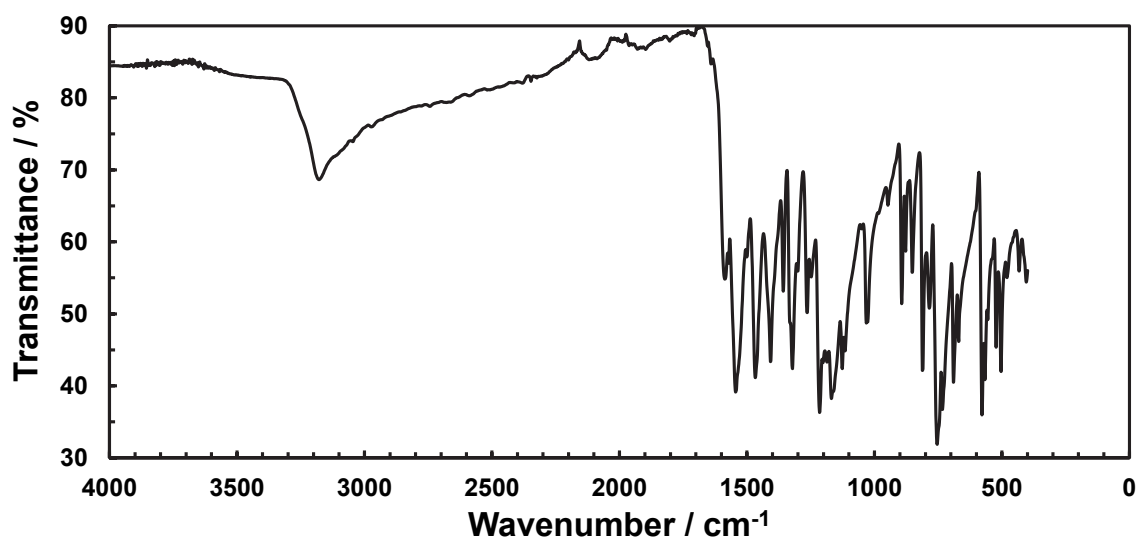

**Fig. S53** ATR-FT-IR spectrum of **PZ1** crystal obtained by recrystallization from a mixed solvent of CH<sub>2</sub>Cl<sub>2</sub>/hexane.<sup>S1</sup>

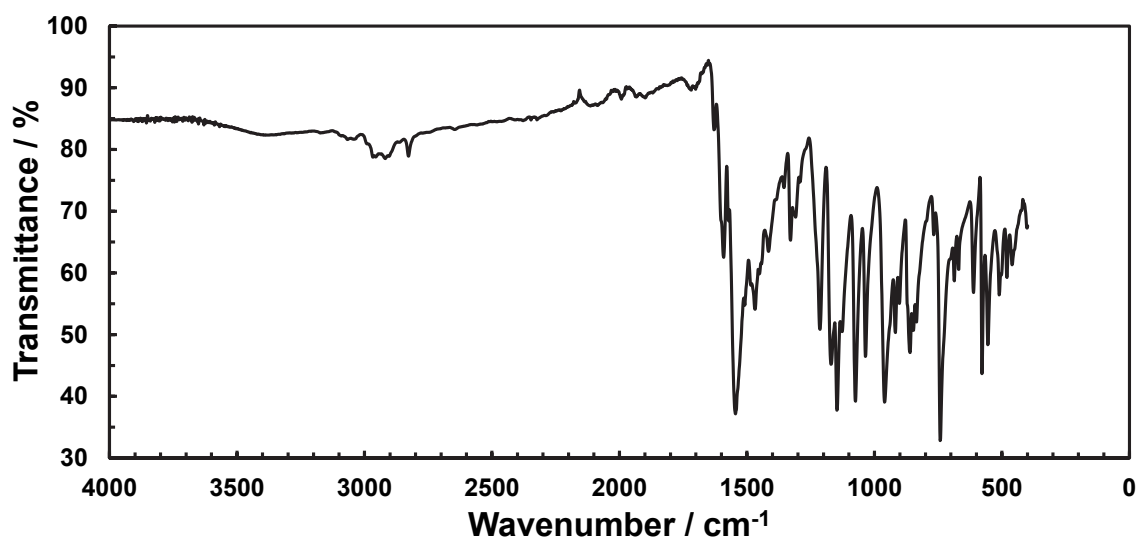

**Fig. S54** ATR-FT-IR spectrum of **PZ2** crystal obtained by recrystallization from a mixed solvent of CH<sub>2</sub>Cl<sub>2</sub>/hexane.<sup>S1</sup>

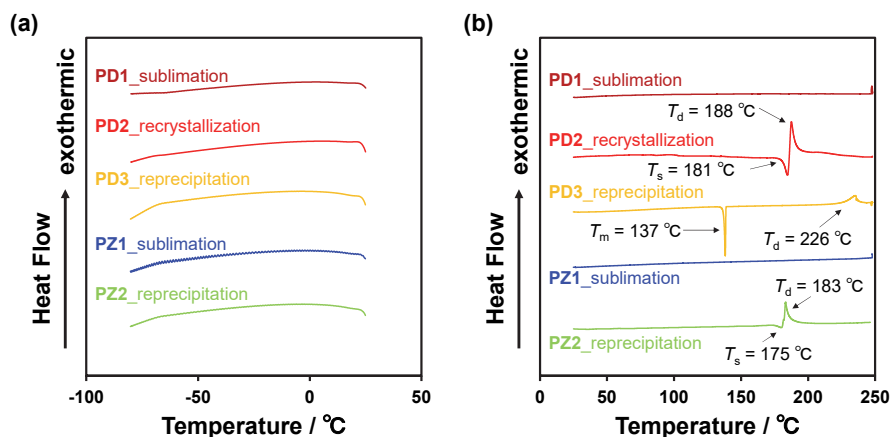

**Fig. S55** DSC curves (a: cooling process from 25 °C to -80 °C with a scan rate of 10 °C min<sup>-1</sup> and b: heating process from 25 °C to 250 °C with a scan rate of 1 °C min<sup>-1</sup>) of **PD1-3**, **PZ1**, and **PZ2**.

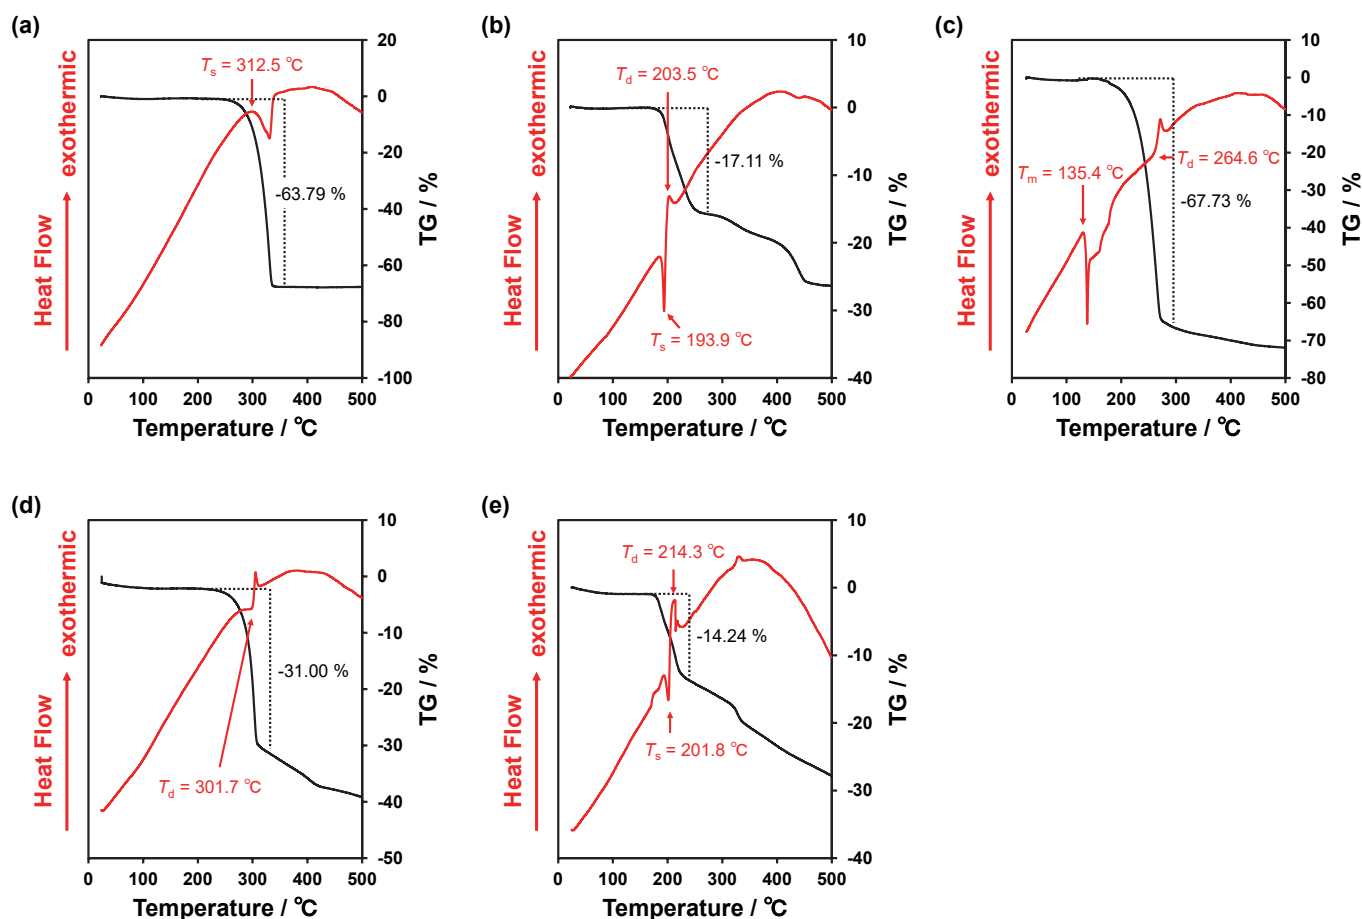

**Fig. S56** DTA-TG curves (heating process from 25 °C to 500 °C with a scan rate of 10 °C min<sup>-1</sup>) of (a) **PD1**, (b) **PD2**, (c) **PD3**, (d) **PZ1**, and (e) **PZ2**. Temperatures at 5% weight loss ( $T_{5\%}$ ) are 285 °C for **PD1**, 203 °C for **PD2**, 209 °C for **PD3**, 272 °C for **PZ1**, and 194 °C for **PZ2**.

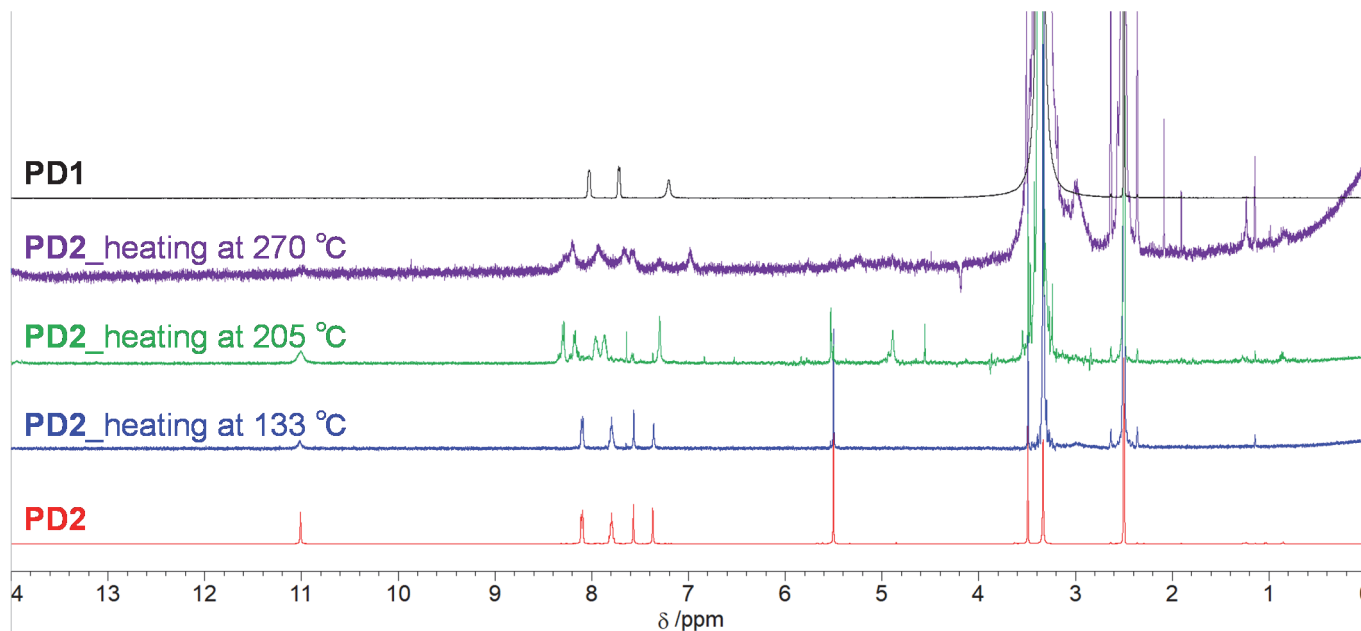

**Fig. S57** <sup>1</sup>H NMR spectra of **PD2**, **PD2** after heating at 133 °C under vacuum, **PD2** after heating at 205 °C, **PD2** after heating at 270 °C under nitrogen atmosphere, and **PD1** in DMSO-*d*<sub>6</sub>.

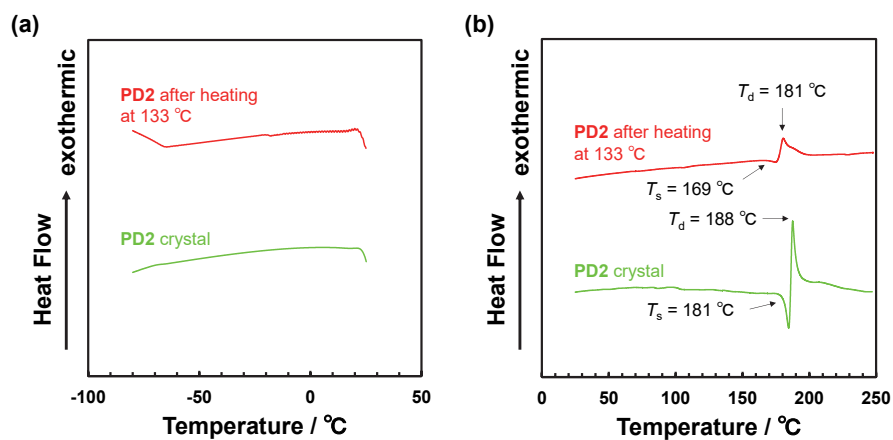

**Fig. S58** DSC curves (a: cooling process from 25 °C to -80 °C with a scan rate of 10 °C min<sup>-1</sup> and b: heating process from 25 °C to 250 °C with a scan rate of 1 °C min<sup>-1</sup>) of solid of sublimate obtained by heating the crystals of **PD2** at 133 °C under vacuum (red) and crystals of **PD2** obtained by the recrystallization from the ethanol solution (green).

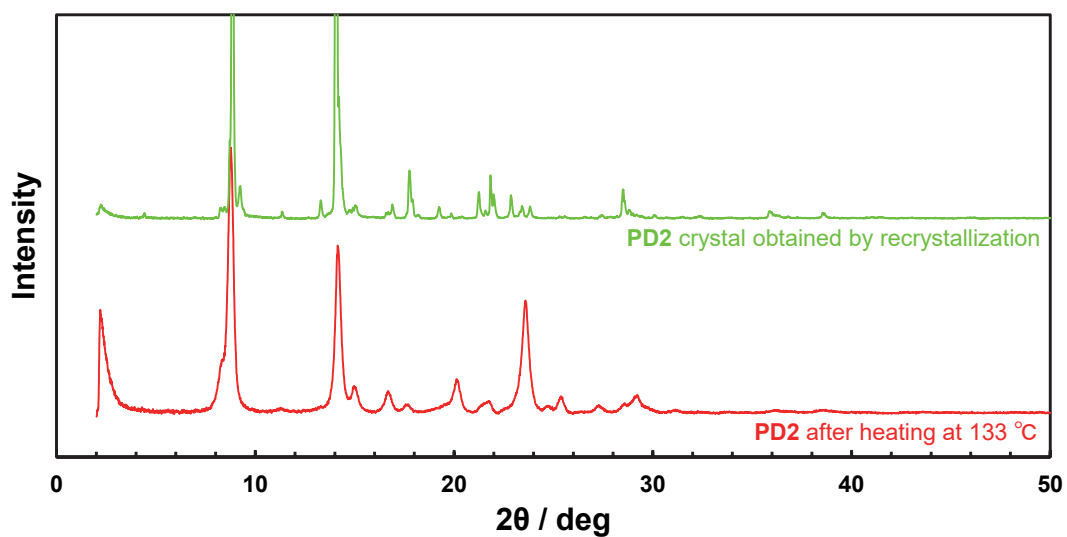

**Fig. S59** Powder X-ray diffraction patterns of crystals of **PD2** obtained by the recrystallization from the ethanol solution (green) and solid of sublimate obtained by heating the crystals of **PD2** at 133 °C under vacuum (red).

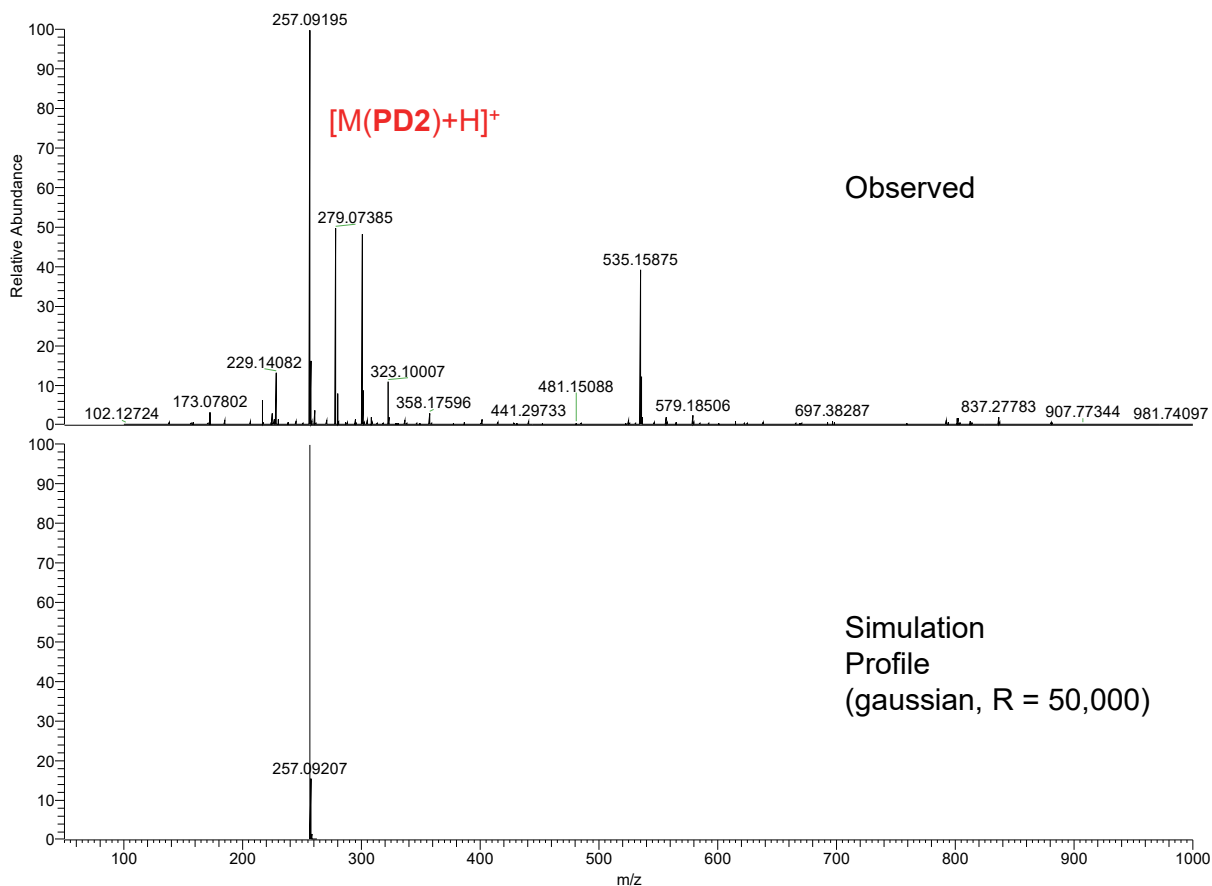

**Fig. S60** HRMS spectrum (ESI, positive) of **PD2**.

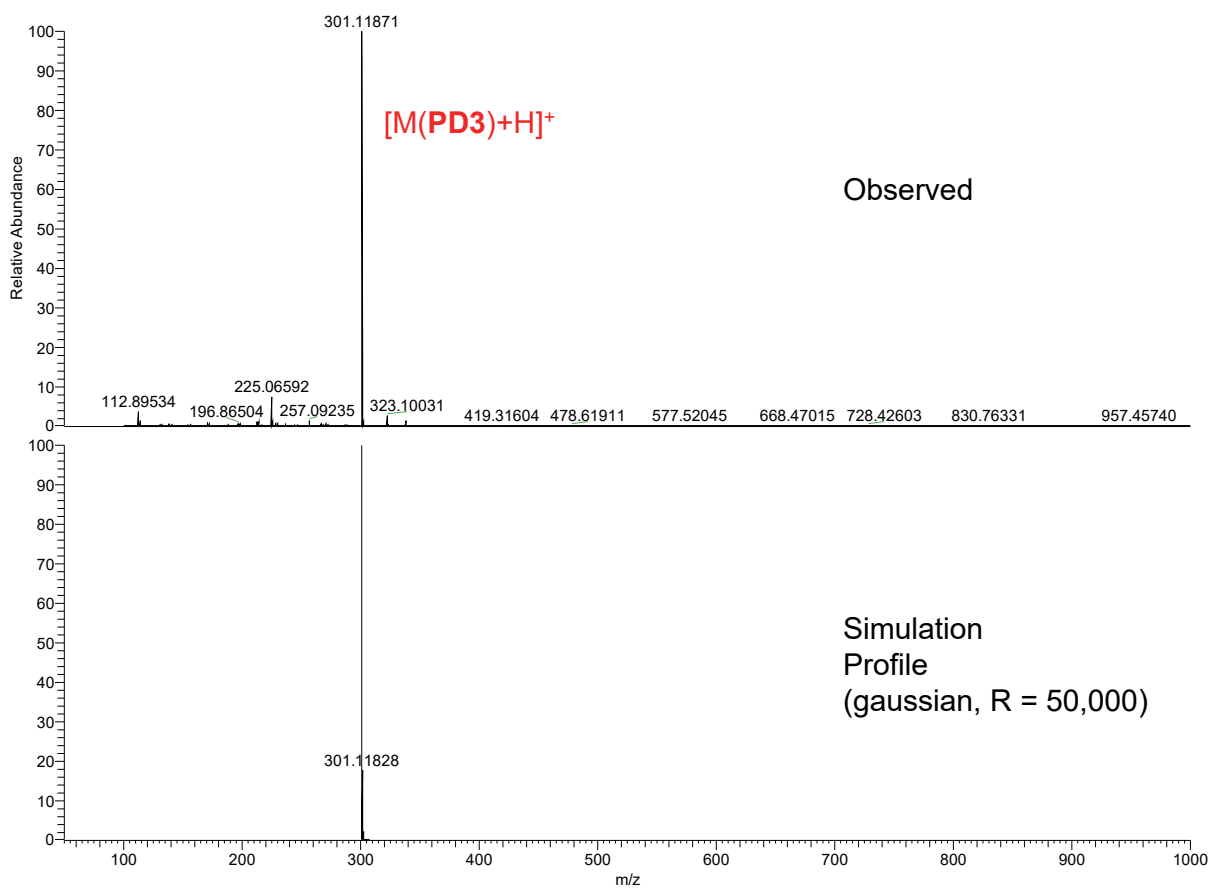

**Fig. S61** HRMS spectrum (APCI, positive) of **PD3**.

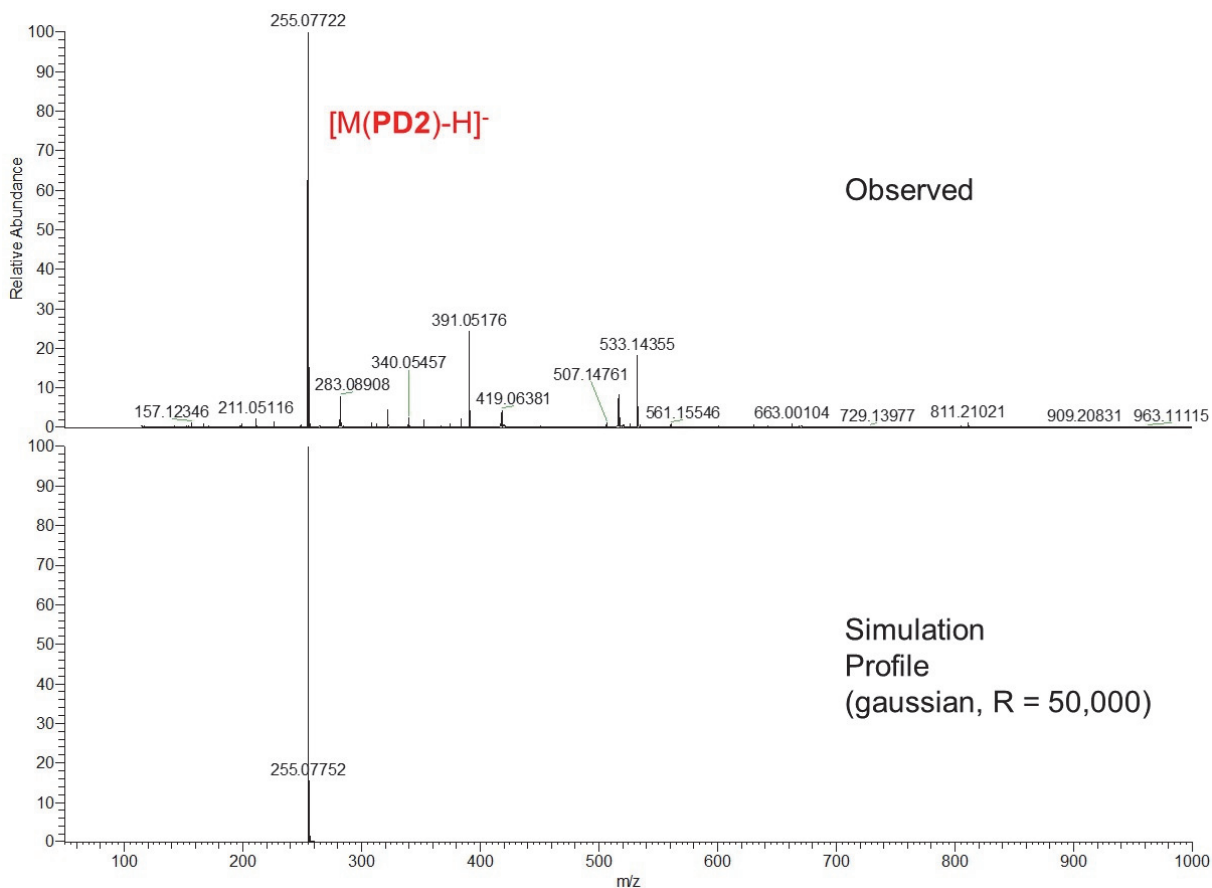

**Fig. S62** HRMS spectrum (ESI, negative) of PD2 after heating at 133 °C under vacuum.

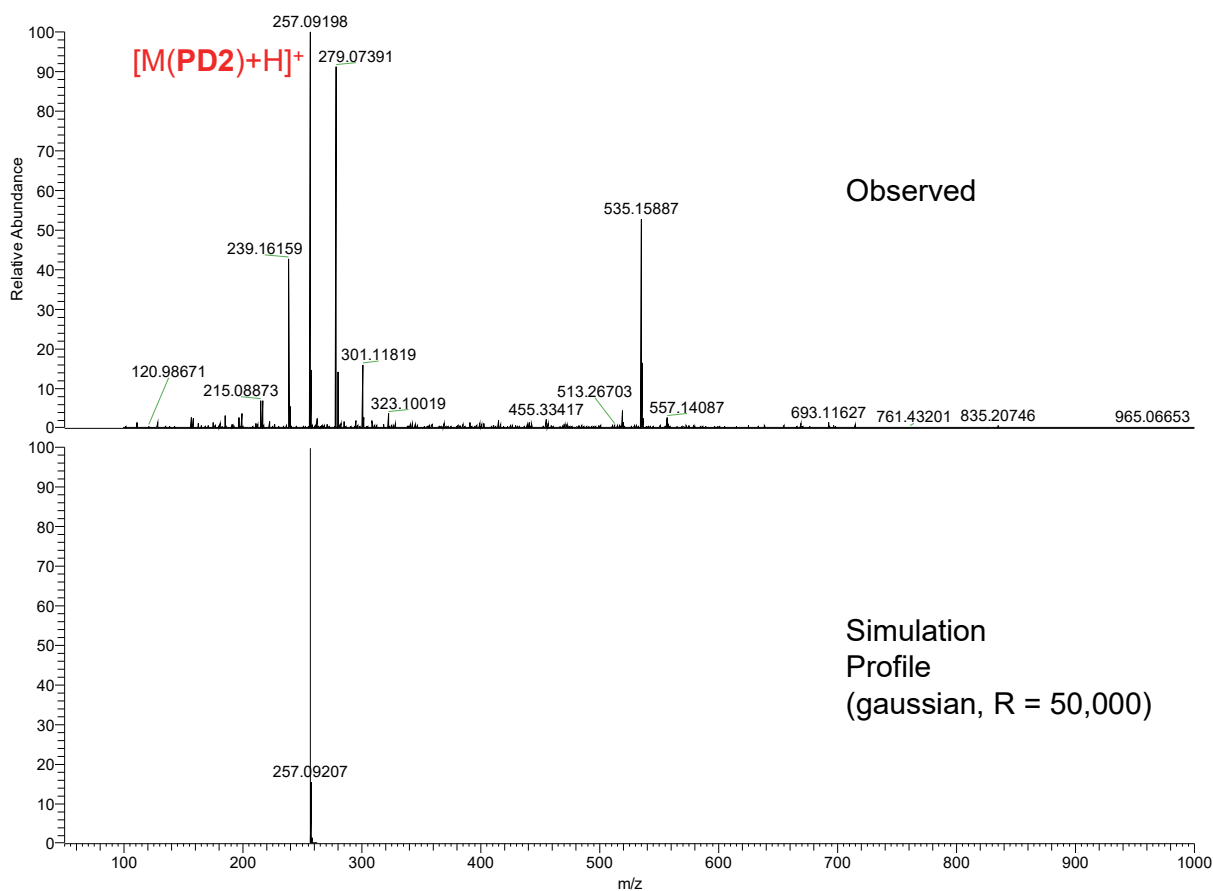

**Fig. S63** HRMS spectrum (ESI, positive) of PD2 after heating at 133 °C under vacuum.

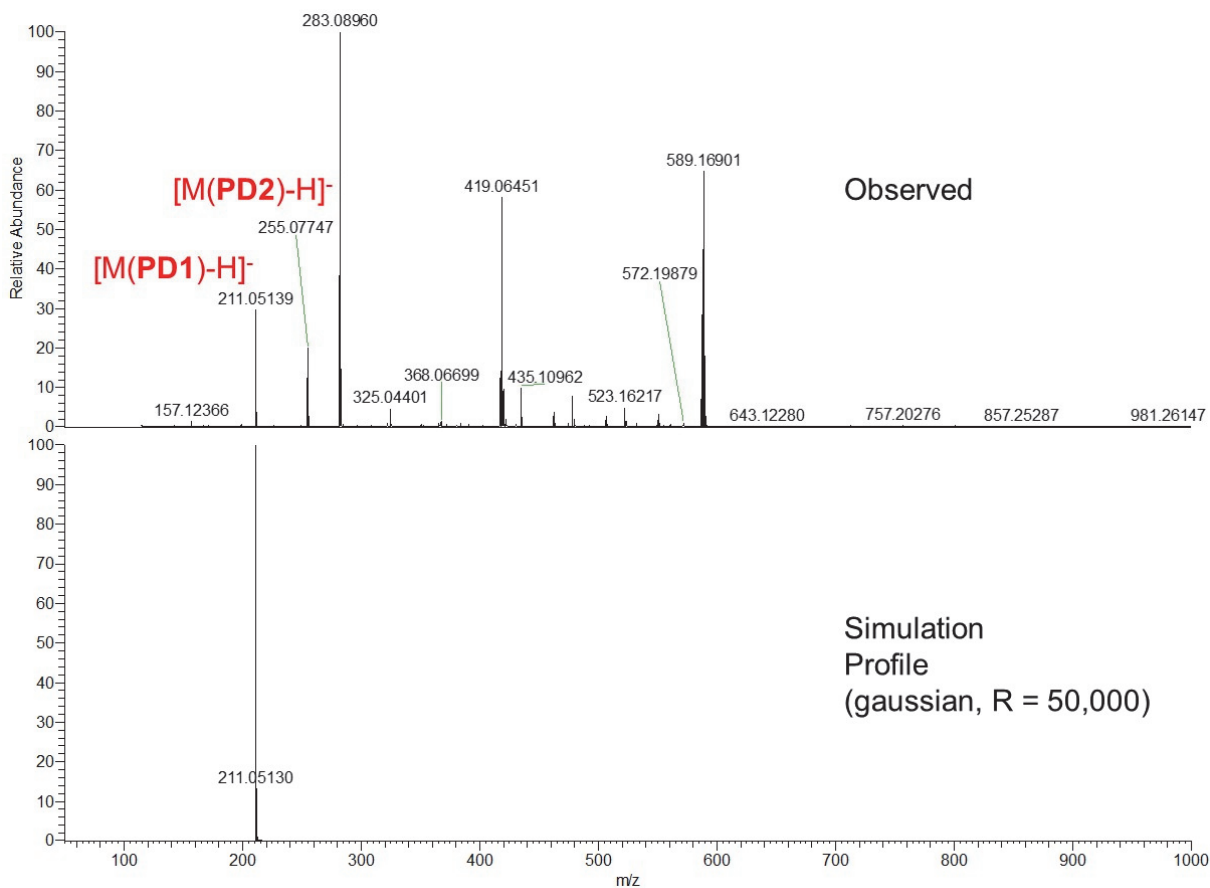

**Fig. S64** HRMS spectrum (ESI, negative) of PD2 after heating at 205 °C under nitrogen atmosphere.

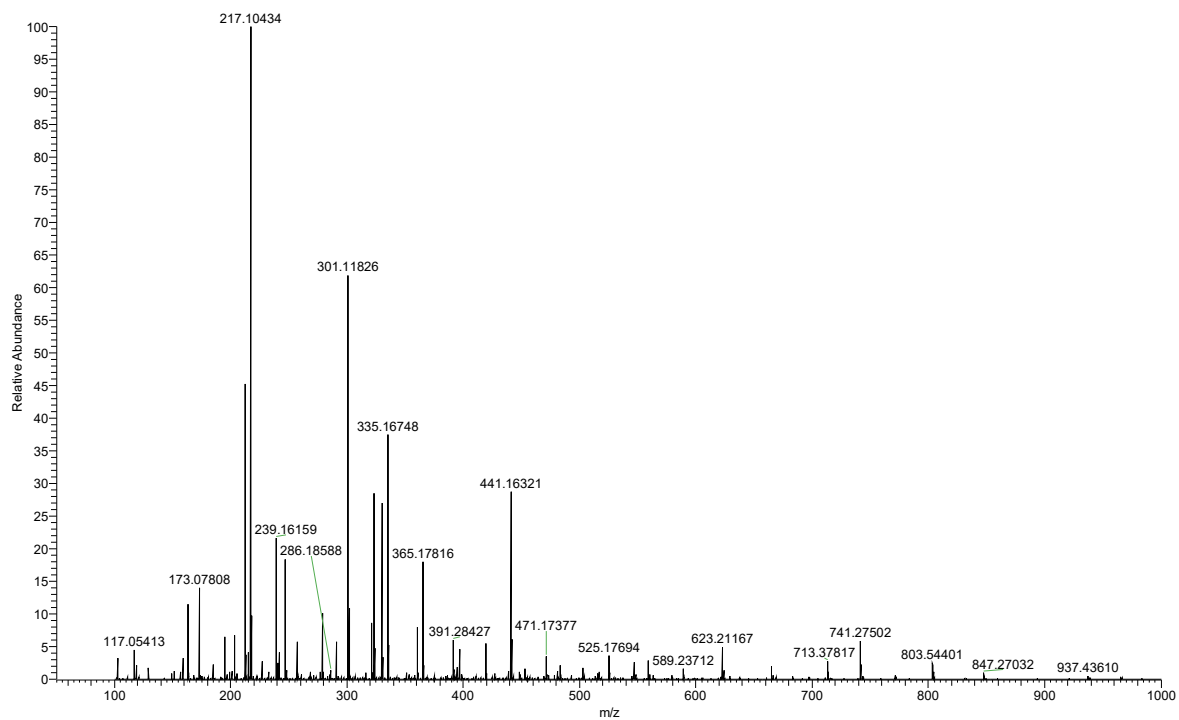

**Fig. S65** HRMS spectrum (ESI, positive) of PD2 after heating at 205 °C under nitrogen atmosphere.



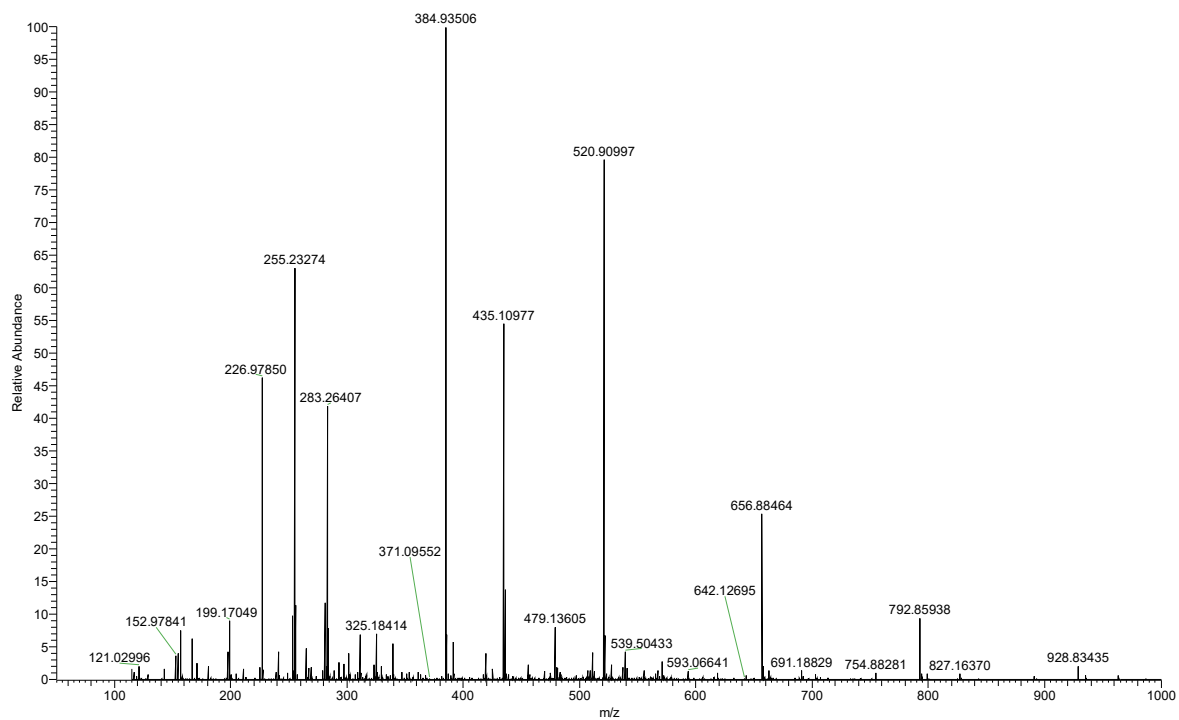

**Fig. S66** HRMS spectrum (ESI, negative) of PD2 heating at 270 °C under nitrogen atmosphere.

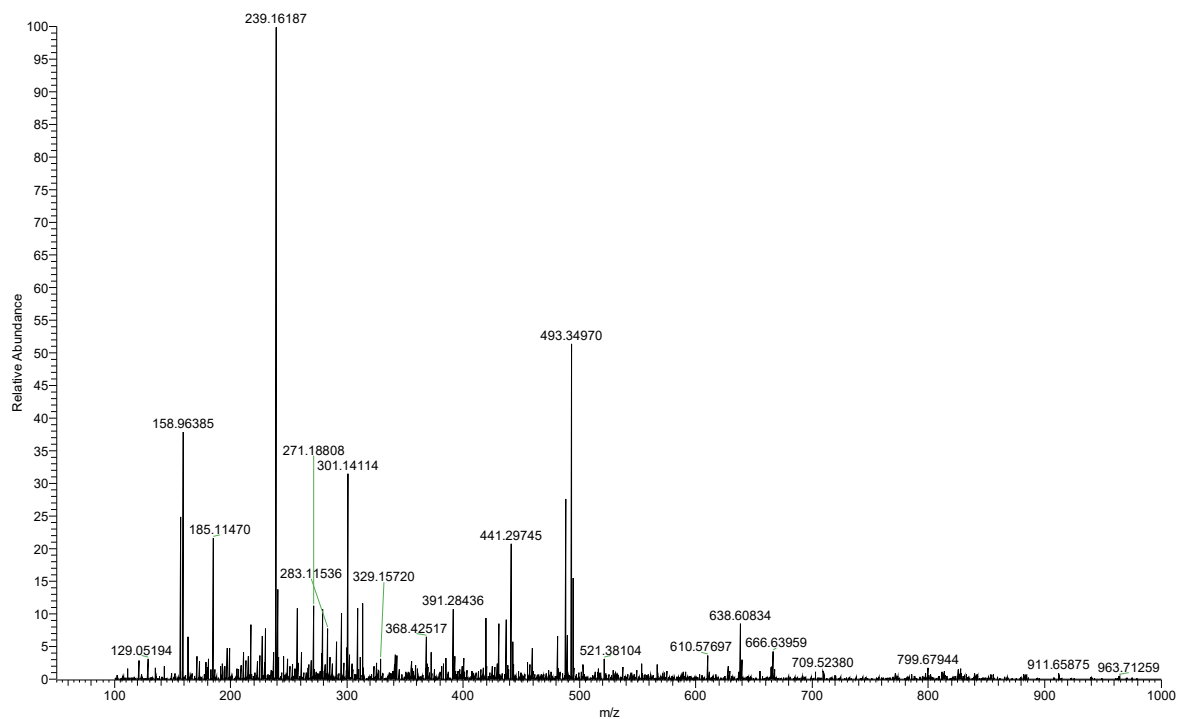

**Fig. S67** HRMS spectrum (ESI, positive) of PD2 heating at 270 °C under nitrogen atmosphere.

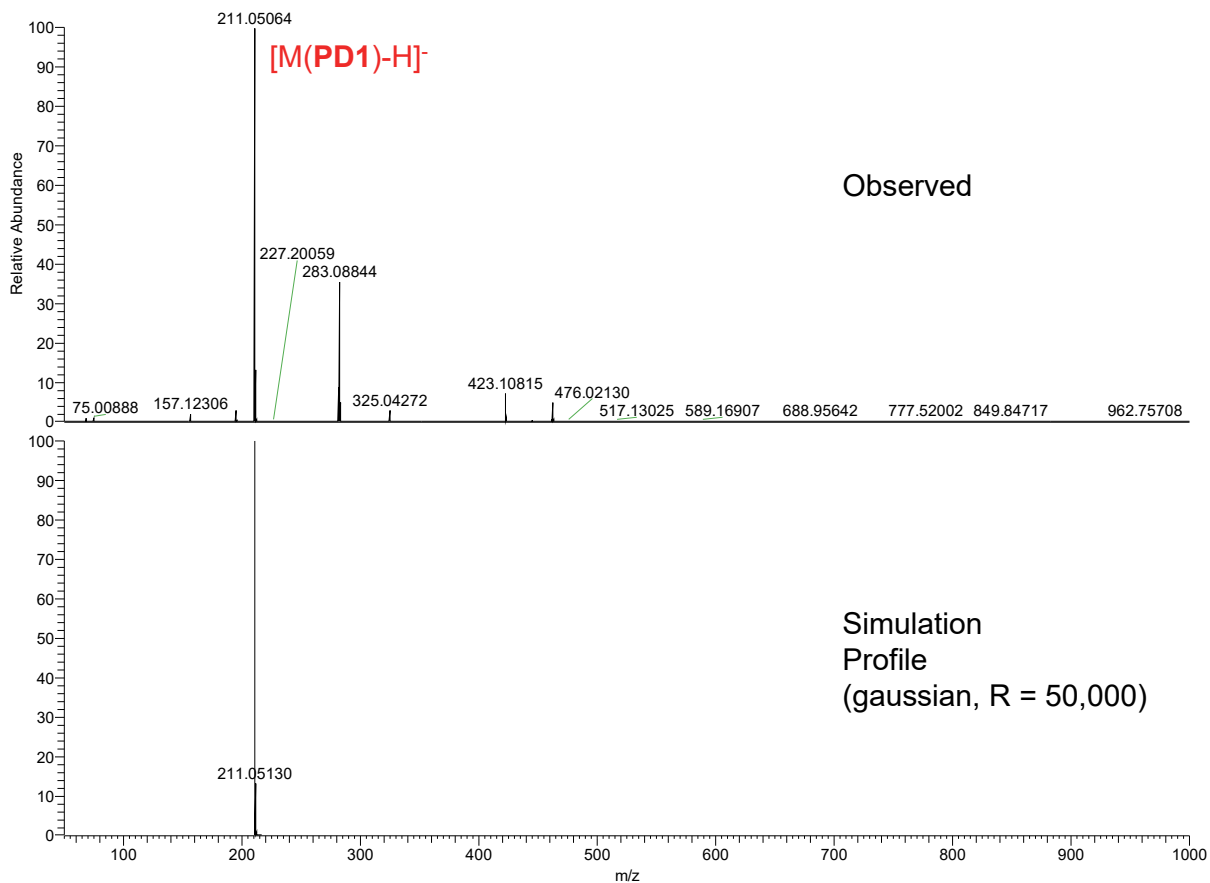

Fig. S68 HRMS spectrum (ESI, negative) of PD1.

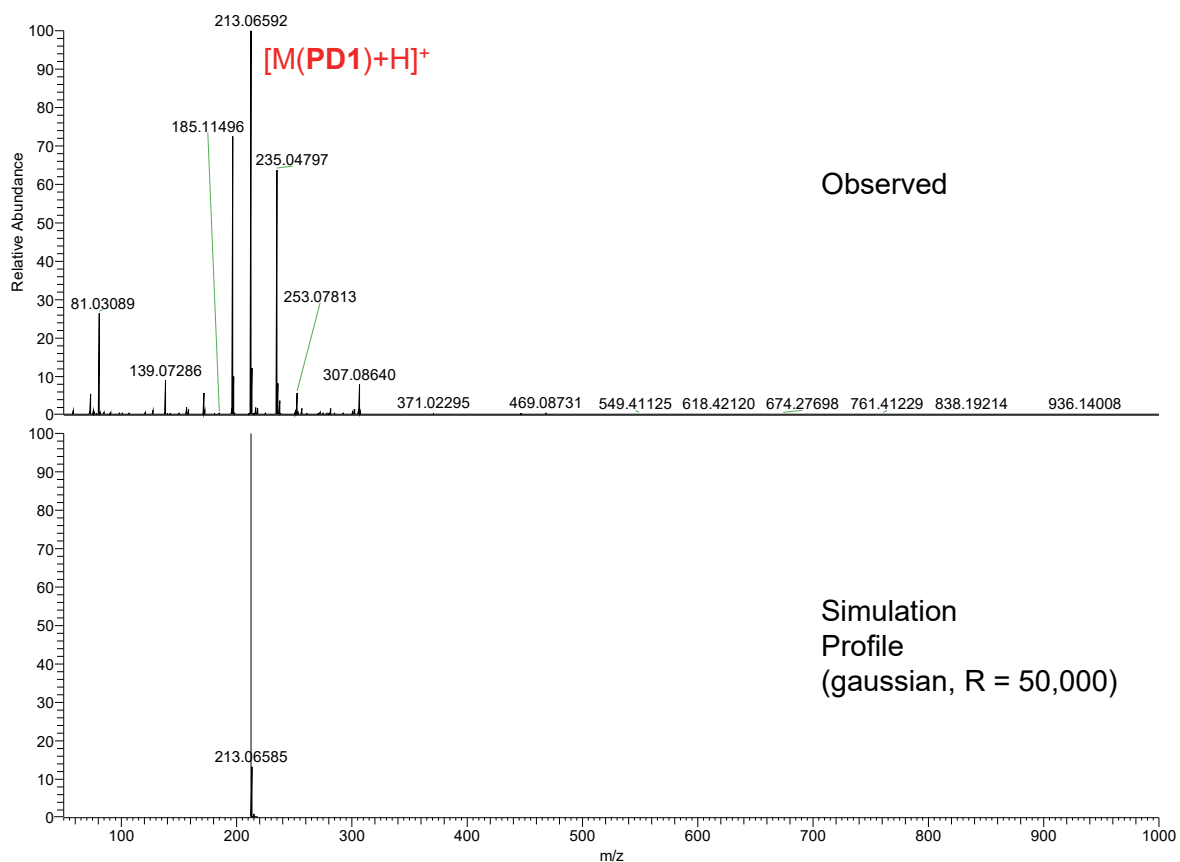

Fig. S69 HRMS spectrum (ESI, positive) of PD1.

## 10. Supporting References

- S1. K. Ohira, M. Yamamoto, K. Imato and Y. Ooyama, *New J. Chem.*, 2023, **47**, 2711–2718.
- S2. Gaussian 16, Revision B.01 and C.01, Gaussian, Inc., Wallingford CT, 2016.
- S3. K. Ogawa, M. Miura, T. Nakayama and J. Harada, *Chem. Lett.*, 2003, **32**, 840–841.
